# Supplementary material
Source: publisher figshare collection journal article supplement (https://tandf.figshare.com/articles/dataset/_/9938042)
Supplement: Supplementary file 3 [file 1]

## **SUPPLEMENTAL MATERIALS**

## Supplemental Materials

### Tables

- Table S1. Tissues collected at necropsy
- Table S2. Body weight and food consumption
- Table S3. BALF (first wash) parameters (Excel)
- Table S4. BALF parameters: cytology

### Figures

- Figure S1. Respiratory physiology (10-min pre-exposure & first 60 min of exposure)
- Figure S2. BALF (first wash): MAP – separate PDF
- Figure S3. BALF (first wash): PRM – separate PDF
- Figure S4. BALF cytology: T-cells
- Figure S5. BALF cytology: B-cells
- Figure S6. BALF cytology: macrophages and monocytes
- Figure S7. BALF cytology: dendritic cells
- Figure S8. BALF cytology: density plots
- Figure S9. Volcano plots representing the changes in protein abundances in the lung
- Figure S10. Comparison of gene expression between contrasts – separate PDF

**Table S1. Tissues collected at necropsy**


---

|                                                       |                                                                  |
|-------------------------------------------------------|------------------------------------------------------------------|
| Animal identification                                 | Nasal turbinates (4 levels)                                      |
| Adrenal glands                                        | Ovaries (without oviduct)                                        |
| Aorta                                                 | Pancreas                                                         |
| Bone with articular surface and marrow (femur)        | Pharynx                                                          |
| Brain                                                 | Pituitary gland                                                  |
| Esophagus                                             | Salivary gland (mandibular)                                      |
| Eyes with optic nerves                                | Sciatic nerve                                                    |
| Gallbladder                                           | Skeletal muscle (biceps femoris)                                 |
| Gross lesions                                         | Spinal cord (thoracolumbar)                                      |
| Heart                                                 | Spleen                                                           |
| Intestine, large (cecum, colon, rectum)               | Stomach                                                          |
| Intestine, small (duodenum, jejunum, ileum)           | Thymus                                                           |
| Kidneys                                               | Thyroid gland (with parathyroids, if present in routine section) |
| Larynx (3 sections)                                   | Trachea                                                          |
| Liver (median lobe and left lateral lobe)             | Tongue                                                           |
| Lungs with bronchia                                   | Urinary bladder                                                  |
| Lymph node (mandibular, mesenteric, tracheobronchial) | Uterus (with cervix)                                             |
| Mammary gland                                         |                                                                  |

---

**Table S2. Body weight and food consumption**

| Parameter                                    | Group                                 |                                |                               |                                |                           |
|----------------------------------------------|---------------------------------------|--------------------------------|-------------------------------|--------------------------------|---------------------------|
|                                              | Sham (Air)<br>Control<br>(0 µg TPM/L) | Carrier<br>(1,550 µg<br>TPM/L) | Test-1<br>(1,400 µg<br>TPM/L) | Test-2<br>(1,400 µg<br>TPM/L)  | 3R4F<br>(550 µg TPM/L)    |
| <b>Body Weight (mean [g] ± SD)</b>           |                                       |                                |                               |                                |                           |
| Day -7*                                      | 20.282±2.584                          | 21.008 ±1.404                  | 20.905±1.701                  | 21.119±1.197                   | 20.773±1.949              |
| Day 1*                                       | 20.593 ±1.044                         | 20.468±1.049                   | 20.890±1.222                  | 20.656±1.227                   | 20.921±1.125              |
| Day 5**                                      | 20.080±1.025                          | 19.963±1.109                   | 20.020±1.156                  | 20.048±1.053                   | 19.839±1.216              |
| Day 8*                                       | 21.120±1.077                          | 20.866±1.211                   | 20.971±1.202                  | 20.631±1.103                   | 21.119±1.260              |
| Day 12***                                    | 19.976±1.045                          | 20.110±1.177                   | 20.202±1.308                  | 19.600±1.877                   | 19.712±1.257              |
| Day 15***                                    | 21.317±1.120                          | 21.455±1.100                   | 21.695±1.161 <sup>c</sup>     | 21.407±1.498                   | 21.051±1.234              |
| Day 17 <sup>&amp;</sup>                      | 20.517±0.954                          | 20.883±0.983                   | 19.933±1.164                  | 20.533±1.500                   | 20.067±1.076              |
| Day 18 <sup>@</sup>                          | 19.840±1.265                          | 20.133±1.072                   | 20.160±1.331                  | 20.820±1.195 <sup>c</sup>      | 19.533±0.756              |
| Day 19 <sup>#</sup>                          | 20.580±0.846                          | 20.726±1.474                   | 21.095±1.298                  | 19.925±1.740 <sup>d</sup>      | 20.505±1.213              |
| <b>Body Weight Gain (mean [g] ± SD/day)*</b> |                                       |                                |                               |                                |                           |
| Day 1*                                       | 0.039±0.291                           | -0.068±0.140                   | -0.002±0.155 <sup>b</sup>     | -0.058±0.096                   | 0.019±0.249               |
| Day 5**                                      | -0.128±0.231                          | -0.126±0.194 <sup>c</sup>      | -0.218±0.141 <sup>a,b</sup>   | -0.152±0.172 <sup>c,d</sup>    | -0.271±0.200 <sup>a</sup> |
| Day 8 **                                     | 0.346±0.200                           | 0.301±0.222                    | 0.317±0.224                   | 0.194±0.154 <sup>a,b,c,d</sup> | 0.414±0.296               |
| Day 12***                                    | -0.286±0.200                          | -0.188±0.141 <sup>c</sup>      | -0.192±0.246 <sup>c</sup>     | -0.258±0.413 <sup>c</sup>      | -0.352±0.217              |
| Day 15***                                    | 0.447±0.229                           | 0.448±0.237                    | 0.498±0.265                   | 0.602±0.599                    | 0.446±0.279               |
| Day 17 <sup>&amp;</sup>                      | -0.817±0.413                          | -0.675±0.238                   | -0.950±0.449 <sup>c</sup>     | -0.650±0.202                   | -0.392±0.139              |
| Day 18 <sup>@</sup>                          | -0.393±0.356                          | -0.300±0.239                   | -0.420±0.168                  | -0.353±0.228                   | -0.387±0.225              |
| Day 19 <sup>#</sup>                          | -0.178±0.183                          | -0.204±0.233                   | -0.191±0.100                  | -0.250±0.568                   | -0.219±0.169              |
| <b>Feed Consumption (mean [g] ± SD/day)</b>  |                                       |                                |                               |                                |                           |
| Day 8*                                       | 4.0±0.4                               | 3.7±0.4 <sup>a</sup>           | 4.0±0.6 <sup>c</sup>          | 3.9±0.5                        | 3.7±0.7 <sup>a</sup>      |
| Day 15 <sup>%</sup>                          | 4.1±0.4                               | 3.9±0.8 <sup>a,c</sup>         | 4.1±0.9 <sup>c</sup>          | 3.8±0.6 <sup>a,c</sup>         | 3.6±1.2 <sup>a</sup>      |
| Day 17 <sup>&amp;</sup>                      | 3.4±0.3                               | 3.3±0.5 <sup>c</sup>           | 3.2±0.3 <sup>c</sup>          | 2.8±0.3 <sup>a</sup>           | 2.6±0.2 <sup>a</sup>      |
| Day 18 <sup>@</sup>                          | 3.4±0.5                               | 3.5±0.4 <sup>c</sup>           | 3.4±0.5 <sup>c</sup>          | 3.3±0.4 <sup>c</sup>           | 2.7±0.3 <sup>a</sup>      |
| Day 19 <sup>#</sup>                          | 3.7±0.4                               | 3.6±0.3 <sup>c</sup>           | 3.8±0.4 <sup>c</sup>          | 3.5±0.9 <sup>c</sup>           | 2.9±0.3 <sup>a</sup>      |

\*N=41 all Groups except N=39 in Sham (Air) group for food consumption Day 8

\*\*N=41 all Groups except N=39 for 3R4F Cigarette Group

\*\*\*N=41 all Groups except N=40 for Carrier Group

<sup>&</sup>N=6 all Groups<sup>%</sup>N=41 all Groups except N=39 in Sham (Air) group<sup>%</sup>N=41 all Groups except N=39 for Carrier Group and N=40 for Test-1 Group<sup>@</sup>N=15 all Groups<sup>#</sup>N=20 all Groups except N=19 for Carrier Group<sup>a</sup>  $p \leq 0.05$  compared to Sham (Air) Control<sup>b</sup>  $p \leq 0.05$  compared to Carrier<sup>c</sup>  $p \leq 0.05$  compared to 3R4F cigarette<sup>d</sup>  $p \leq 0.05$  compared to Test-1

**Table S3. BALF (first wash) parameters**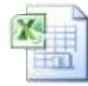

MAP-MMP-PRM  
statistics

### Multi-Analyte Profiling (MAP)

| Kit                                         | Provider         | Catalog number       | Markers                                                                                                                                                                                                                                           |
|---------------------------------------------|------------------|----------------------|---------------------------------------------------------------------------------------------------------------------------------------------------------------------------------------------------------------------------------------------------|
| Mouse Cytokine/<br>Chemokine<br><br>Panel I | EMD<br>Millipore | MCYTOMAG-<br>70K-PMX | G-CSF, GM-CSF, IFN- $\gamma$ , IL-1 $\alpha$ , IL-1 $\beta$ , IL-2, IL-4, IL-5,<br>IL-6, IL-7, IL-9, IL-10, IL-12 (p40), IL-12 (p70), IL-13,<br>IL-15, IL-17, IP-10, KC, MCP-1, MIP-1 $\alpha$ , MIP-1 $\beta$ , MIP-<br>2, RANTES, TNF- $\alpha$ |
| Mouse CVD1                                  | EMD<br>Millipore | MCVD1MAG-<br>77K     | proMMP-9, PAI-1 (total), sE-selectin, sICAM-<br>1, thrombomodulin, pecam-1, sP-selectin                                                                                                                                                           |

### Abbreviations

- G-CSF, Granulocyte colony-stimulating factor
- IL, Interleukin
  - IL-7, IL-4, IL-1 $\alpha$ , IL-9, IL-10, IL-12, IL-6, IL-7, IL-5
- IP-10, interferon  $\gamma$ -induced protein 10 kDa
- KC, Keratinocyte chemoattractant
- MCP-1, Monocyte Chemoattractant Protein-1
- MIP, Macrophage inflammatory protein
  - MIP-1 $\alpha$ , MIP-1 $\beta$ , MIP-2
- TNF, Tumor necrosis factor
- proMMP-9, Precursor of matrix metalloproteinase 9
- GM-CSF, Granulocyte-macrophage colony-stimulating factor
- aldehyde dehydrogenase 3 family member A1 (AL3A1)
- apolipoprotein A1 (ApoA1)
- cathepsin D (CATD)
- cathepsin S (CATS)
- chemokine (C-X-C motif) ligand 15 (CXCL15)

- fetuin-A (FETUA)
- fibrinogen beta chain (FIBB)
- SERPING1 (IC1)
- intercellular adhesion molecule 1 (ICAM-1)
- putative permease (PERM)
- surfactant protein D (SFTPD)
- superoxide dismutase (SODE)
- uteroglobin (UTER), and
- von Willebrand factor (vWF)

As appropriate, data are plotted in Tables S7 and S9 - by treatment group, using mainly boxplots for the univariate illustration of the studied endpoints. The logarithmic scale was used for illustration purposes to facilitate group comparisons. Multivariate charts (principal component biplots) were also used to visualize all analyzed tissue samples vs. all targeted endpoints.

**Table S4. BALF parameters: cytology**

| Parameter                                                                                                     | Group                                 |                               |                              |                             |                            |
|---------------------------------------------------------------------------------------------------------------|---------------------------------------|-------------------------------|------------------------------|-----------------------------|----------------------------|
|                                                                                                               | Sham (Air)<br>Control (0 µg<br>TPM/L) | Carrier<br>(1550 µg<br>TPM/L) | Test-1<br>(1400 µg<br>TPM/L) | Test-2<br>(1400 µg TPM/L)   | 3R4F<br>(550 µg TPM/L)     |
| <b>Bronchoalveolar Lavage – Flow Cytometry – 3 Week Sacrifice* (mean [cells x10<sup>3</sup> per mL] ± SD)</b> |                                       |                               |                              |                             |                            |
| Live Cells                                                                                                    | 219±802                               | 194±86 <sup>c</sup>           | 269±292 <sup>c</sup>         | 220±56 <sup>c</sup>         | 556±94 (N=14)              |
| Dead Cell                                                                                                     | 27±14                                 | 25±7 <sup>c</sup>             | 34±15 <sup>c</sup>           | 45±26 <sup>a,b,c</sup>      | 351±71 <sup>a</sup> (N=14) |
| Total CD45+ Leukocytes                                                                                        | 160±65                                | 138±82 <sup>c</sup>           | 135±41 <sup>c</sup>          | 161±52 <sup>c</sup>         | 417±87 <sup>a</sup> (N=14) |
| Total Macrophages                                                                                             | 195±74                                | 172±82 <sup>c</sup>           | 162±40 <sup>c</sup>          | 185±54 <sup>c</sup>         | 38±12 <sup>a</sup> (N=14)  |
| Total Alveolar Macrophages                                                                                    | 194±74                                | 171±82 <sup>c</sup>           | 161±39 <sup>c</sup>          | 180±57 <sup>c</sup>         | 18±4 <sup>a</sup> (N=14)   |
| Total Interstitial Macrophages/Monocytes                                                                      | 1±0.3 (N=8)                           | 3±2 <sup>c</sup> (N=7)        | 2±3 <sup>c</sup> (N=9)       | 6±12 <sup>a,c</sup> (N=12)  | 19±10 <sup>a</sup> (N=14)  |
| Dendritic Cells                                                                                               | 1 (N=1)                               | ND                            | 1±1 <sup>c</sup> (N=3)       | 3±2 <sup>c</sup> (N=4)      | 20±8 <sup>a</sup> (N=14)   |
| Total activated (CD54+) Macrophages/Monocytes                                                                 | 14±8                                  | 9±3                           | 15±16                        | 10±3                        | 10±3 (N=14)                |
| Activated (CD54+) Alveolar Macrophages                                                                        | 14±8                                  | 9±3                           | 11±7                         | 10±3                        | 8±2 (N=14)                 |
| Activated (CD54+) Interstitial Macrophages/Monocytes                                                          | 0.06±0.03 (N=8)                       | 0.06±0.02 <sup>c</sup> (N=7)  | 0.08±0.08 <sup>c</sup> (N=9) | 0.2±0.3 <sup>c</sup> (N=12) | 3±1 (N=14)                 |
| Activated (CD54+) Dendritic Cells                                                                             | 0.07 (N=1)                            | 0.08 (N=1)                    | 0.03±0.03 <sup>c</sup> (N=3) | 0.1±0.1 <sup>c</sup> (N=4)  | 0.7±0.6 (N=14)             |
| MHC II High Alveolar Macrophages                                                                              | 8±4                                   | 8±4 <sup>c</sup>              | 9±6 <sup>c</sup>             | 7±5 <sup>c</sup>            | 14±3 (N=14)                |
| MHC II High Interstitial Macrophages/Monocytes                                                                | 0.2±0.2 (N=8)                         | 0.1±0.07 <sup>c</sup> (N=7)   | 0.2±0.2 <sup>c</sup> (N=9)   | 0.4±0.3 <sup>c</sup> (N=12) | 9±3 (N=14)                 |
| MHC II High Dendritic Cells                                                                                   | 0.14 (N=1)                            | 0.3 (N=1)                     | 0.09±0.06 <sup>c</sup> (N=3) | 0.2±0.2 <sup>c</sup> (N=4)  | 3±1 (N=14)                 |
| Total Granulocytes                                                                                            | 2 (N=1)                               | ND                            | ND                           | ND                          | 238±42 (N=14)              |
| Neutrophils                                                                                                   | 2 (N=1)                               | ND                            | ND                           | ND                          | 230±40 (N=14)              |
| Eosinophils/Basophils/Mast Cells                                                                              | ND                                    | ND                            | ND                           | ND                          | 9±4 (N=11)                 |
| Total activated (CD54+) Granulocytes                                                                          | ND                                    | ND                            | ND                           | ND                          | 2±0.9 (N=14)               |
| Activated (CD54+) Neutrophils                                                                                 | 0.07 (N=1)                            | ND                            | ND                           | ND                          | 2±0.8 (N=14)               |
| Activated (CD54+) Eosinophils/Basophils/Mast Cells                                                            | ND                                    | ND                            | ND                           | ND                          | 0.1±0.2 (N=11)             |
| B-Cells                                                                                                       | 2 ± 1                                 | 3 ± 1 <sup>c</sup>            | 2±1 <sup>c</sup>             | 3±2 <sup>c</sup>            | 22±12 <sup>a</sup> (N=14)  |
| Activated (CD69+) B-Cells                                                                                     | 0.6±0.4(N=12)                         | 0.6±0.4 <sup>c</sup>          | 0.7±0.5 <sup>c</sup> (N=13)  | 0.7±0.7 <sup>c</sup> (N=13) | 7±4 (N=14)                 |
| MHC II High B-Cells                                                                                           | 0.2±0.2 (N=12)                        | 0.4±0.6 <sup>c</sup>          | 0.4±0.3 <sup>c</sup> (N=13)  | 0.4±0.5 <sup>c</sup> (N=13) | 13±9 (N=14)                |
| Total CD3+ T-Cells                                                                                            | 7±5                                   | 6±6 <sup>c</sup>              | 5±4 <sup>c</sup>             | 5±3 <sup>c</sup>            | 150±54 <sup>a</sup> (N=14) |
| CD4+ T-Cells                                                                                                  | 3±2 (N=5)                             | 1 (N=1)                       | 4±6 <sup>c</sup> (N=5)       | 2±3 <sup>c</sup> (N=2)      | 44±24 <sup>a</sup> (N=14)  |
| CD8+ T-Cells                                                                                                  | 4±1 (N=6)                             | 8±9 <sup>c</sup> (N=3)        | 4±2 <sup>c</sup> (N=4)       | 5±4 <sup>c</sup> (N=4)      | 93±37 <sup>a</sup> (N=6)   |
| Activated (CD69+) CD4+ T-Cells                                                                                | 0.9±0.5 (N=5)                         | 0.2 (N=1)                     | 0.7±0.6 <sup>c</sup> (N=5)   | 1±2 <sup>c</sup> (N=2)      | 19±9 (N=14)                |
| Activated (CD69+) CD8+ T-Cells                                                                                | 4±1 (N=6)                             | 8±9 <sup>c</sup> (N=3)        | 3±2 <sup>c</sup> (N=4)       | 4±4 <sup>c</sup> (N=4)      | 85±36 (N=6)                |

<sup>a</sup>  $p \leq 0.05$  compared to Sham (Air) Control;<sup>b</sup>  $p \leq 0.05$  compared to compared to Carrier;<sup>c</sup>  $p \leq 0.05$  compared to 3R4F cigarette;<sup>d</sup>  $p \leq 0.05$  compared to Test-1;

\*N=15 per group (the N used for summary statistics differs per parameter based on if enough events of the parent population of cells could be counted during analysis; Actual N (if not 15) are included

ND = Not detected

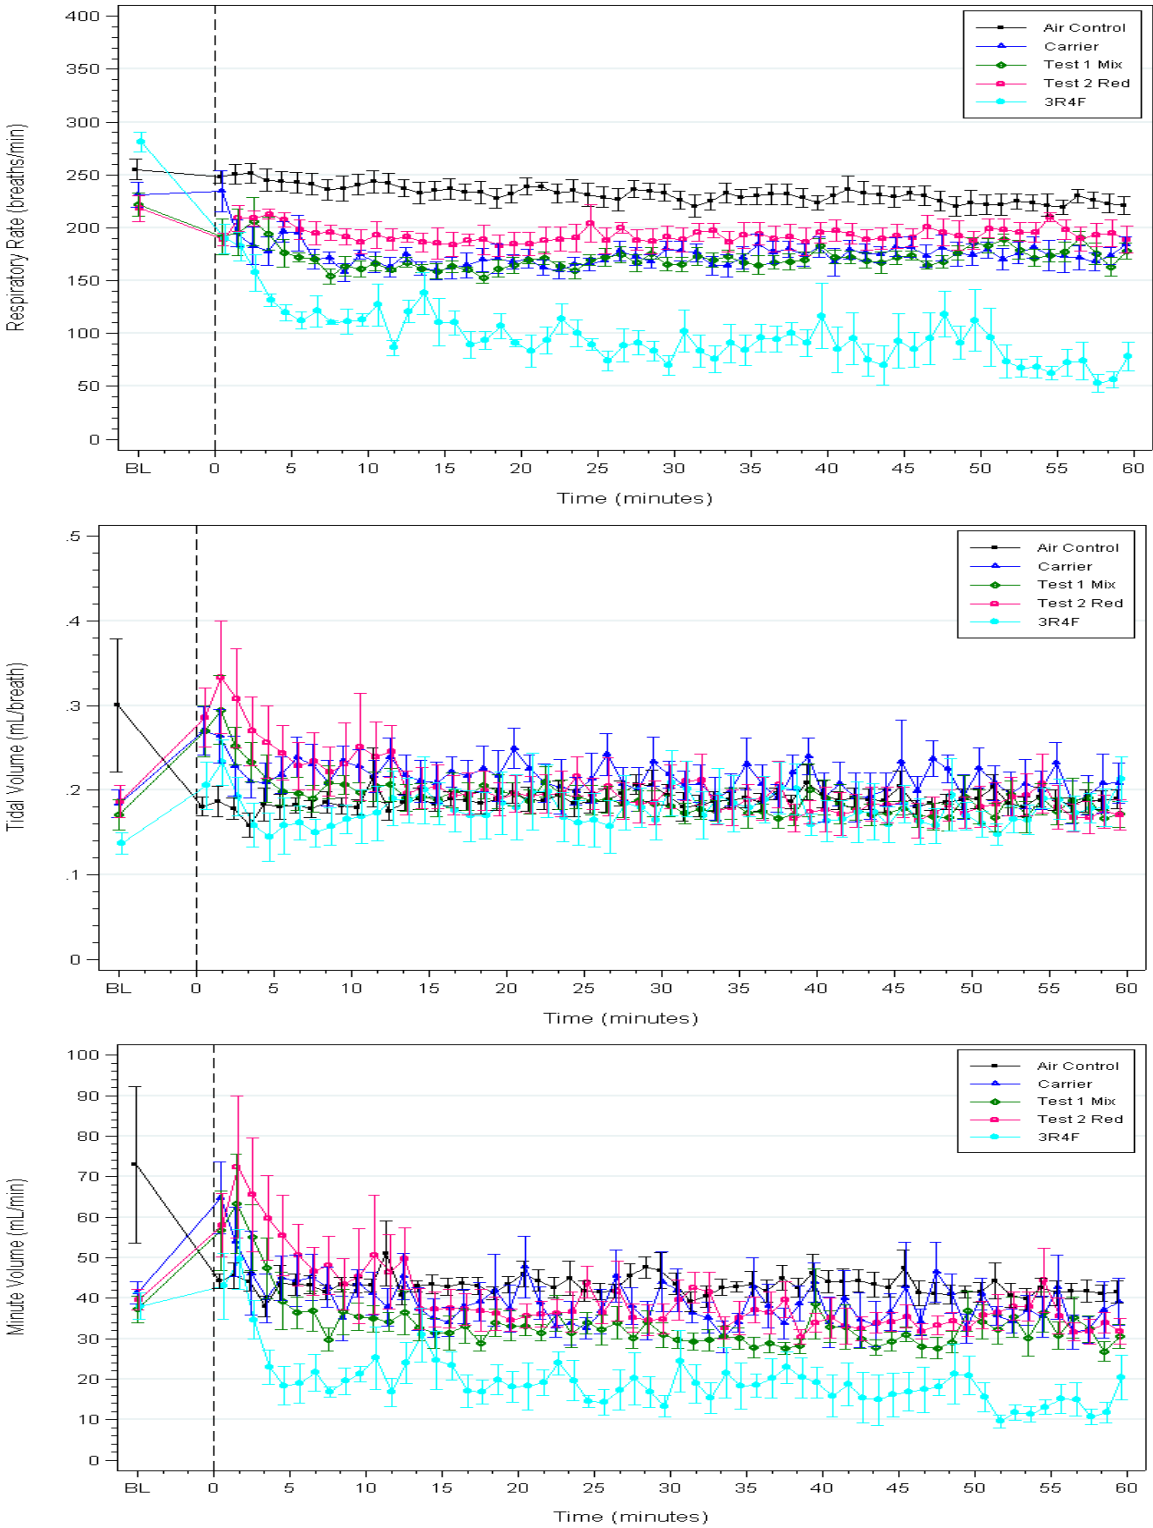

**Figure S1. Respiratory physiology**



**[SEPARATE PDF]**

**Figure S2. BALF (first wash): MAP**

Boxplots for selected BALF cytokines for the study groups (from left to right: Sham, Carrier, Test-1, Test-2, and 3R4F). Black thick lines inside the boxes represent the sample medians. Box's lower and upper limits depict the first and the third sample quartiles, respectively. Box whiskers are defined by extending the box ends by a multiple of the data variability. Points not included within the whiskers are depicted by black dots and may be outliers. Data are plotted on the logarithmic scale for easier visualization and group comparisons. The y-axis on the left reports values in the logarithmic scale, while on the right reports values in the original scale. Red and green dashed-dotted lines illustrate the limits of quantification and detection, respectively. The descriptive statistics are given in Figure S3.

**[SEPARATE PDF]**

**Figure S3. BALF (first wash): PRM**

Parallel reaction monitoring (PRM) of BALF cytokines (The used protein sequence is given next to the protein name in the header): Boxplots for selected parameters for the study groups (from left to right: Sham, Carrier, Test-1, Test-2, and 3R4F). Black thick lines inside the boxes represent the sample medians. Box's lower and upper limits depict the first and the third sample quartiles, respectively. Box whiskers are defined by extending the box ends by a multiple of the data variability. Points not included within the whiskers are depicted by black dots and may be outliers. Data are plotted on the logarithmic scale for easier visualization and group comparisons. The y-axis on the left reports values in the logarithmic scale, while on the right reports values in the original scale. The descriptive statistics are given Figure S3.

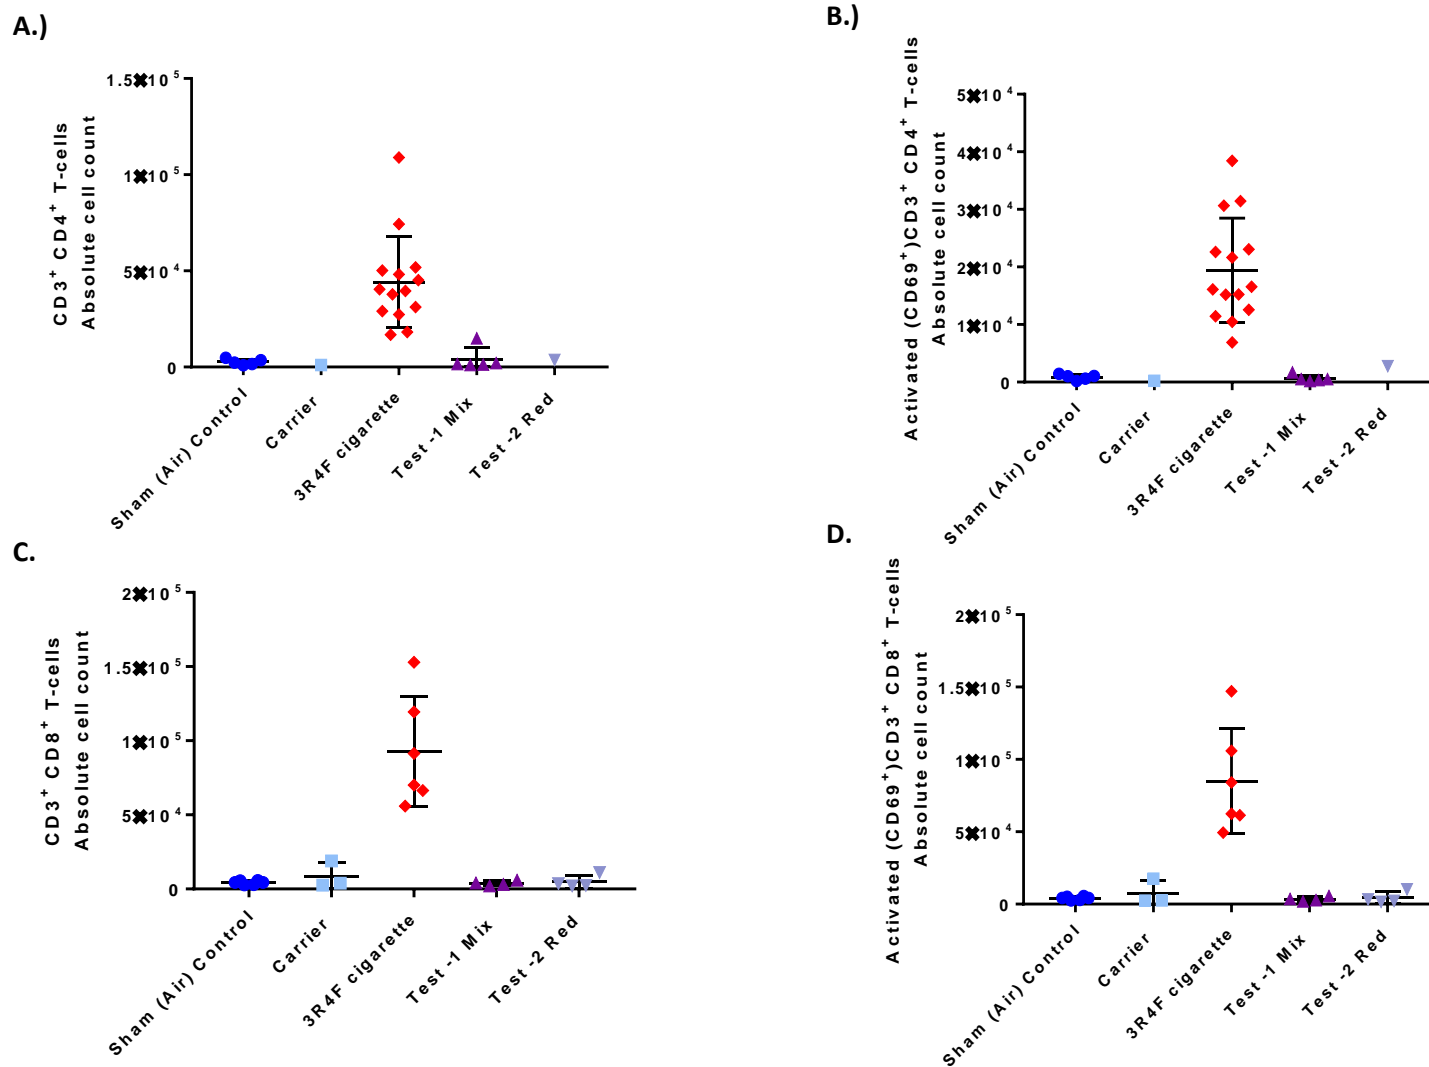

**Figure S4. BALF cytology: T-cells**

- A)** Number of CD3<sup>+</sup> CD4<sup>+</sup> T-cells recovered after bronchial lavage
- B)** Number of activated (CD69<sup>+</sup>) CD3<sup>+</sup> CD4<sup>+</sup> T-cells recovered after bronchial lavage
- C)** Number of CD3<sup>+</sup> CD8<sup>+</sup> T-cells recovered after bronchial lavage
- D)** Number of activated (CD69<sup>+</sup>) CD3<sup>+</sup> CD8<sup>+</sup> T-cells recovered after bronchial lavage

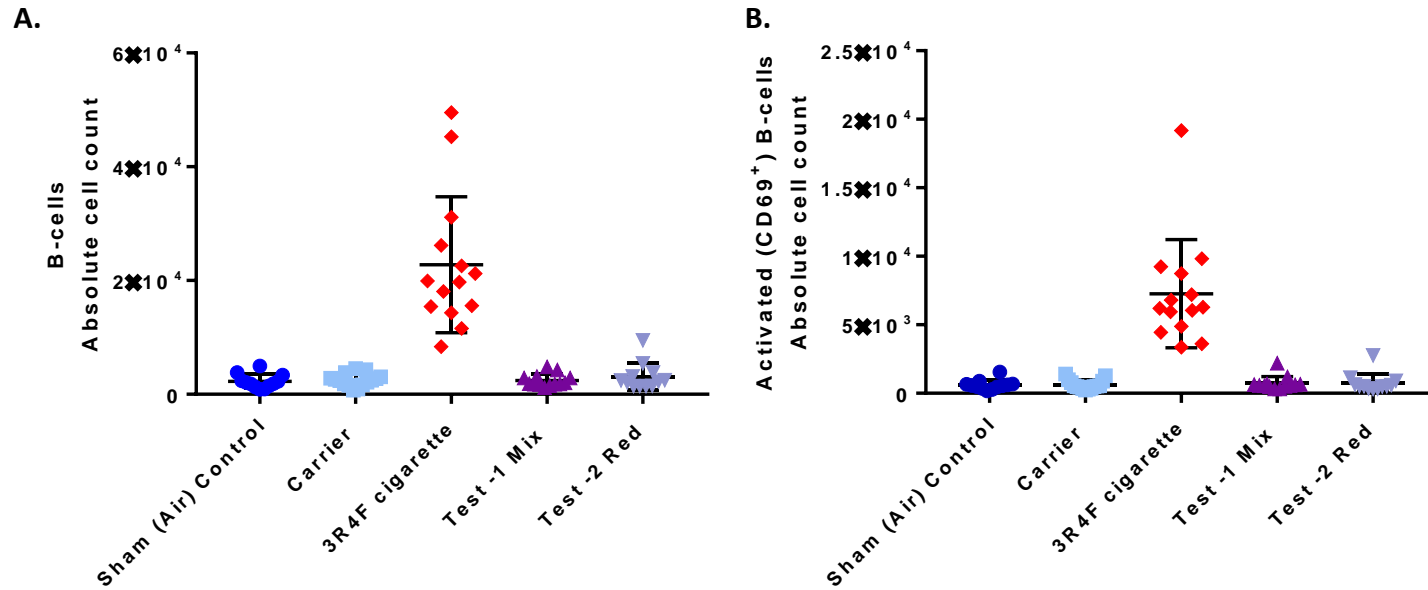

**Figure S5. BALF cytology: B-cells**

- A)** Number of B-cells recovered after bronchial lavage.  
**B)** Number of activated (CD69<sup>+</sup>) B-cells recovered after bronchial lavage.

A.

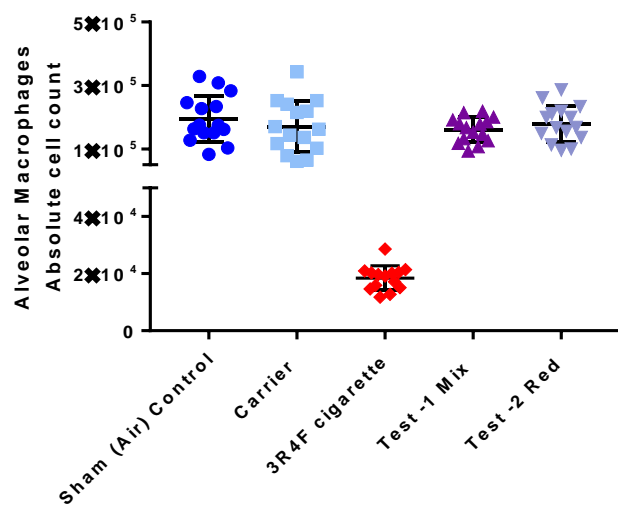

B.

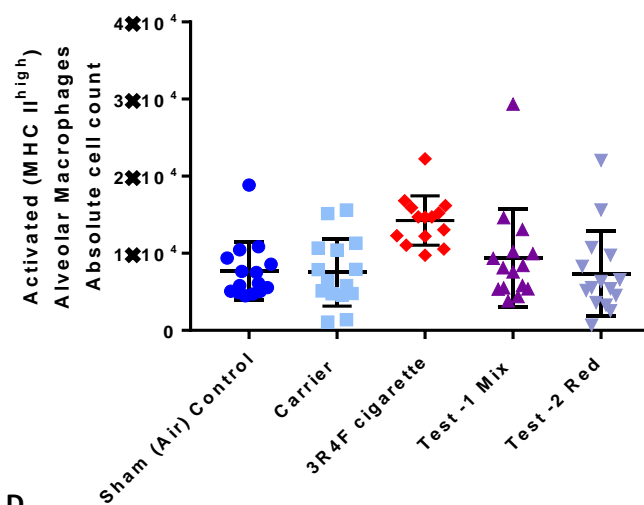

C.

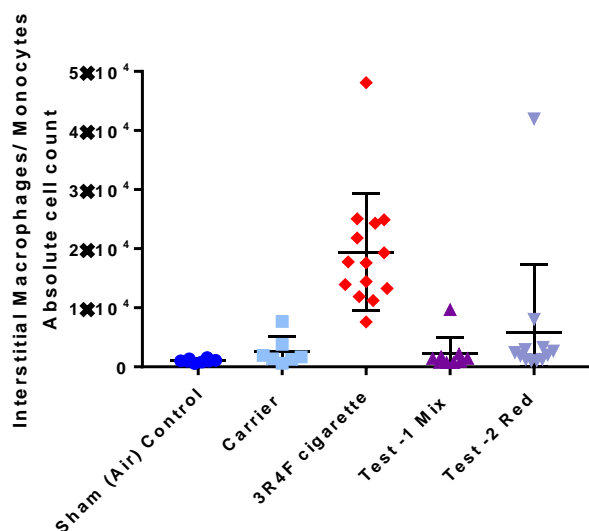

D.

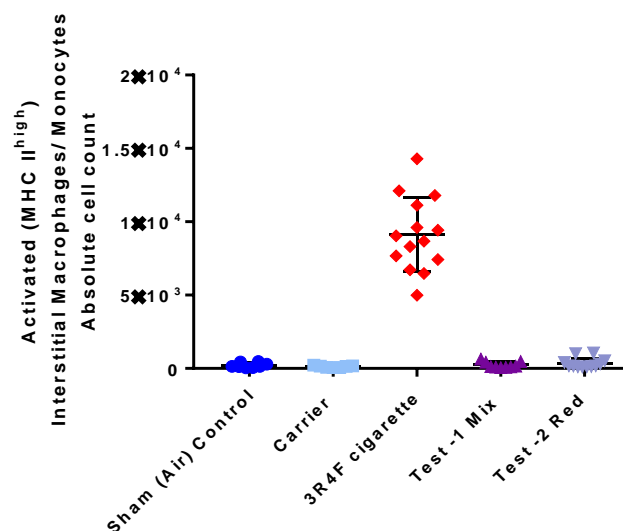

**Figure S6. BALF cytology: macrophages and monocytes**

A) Number of Alveolar Macrophages recovered after bronchial lavage

B.) Number of activated (MHC II<sup>high</sup>) Alveolar Macrophages recovered after bronchial lavage

C.) Number of Interstitial Macrophages/Monocytes recovered after bronchial lavage

D.) Number of activated (MHC II<sup>high</sup>) Interstitial Macrophages/Monocytes recovered after bronchial lavage

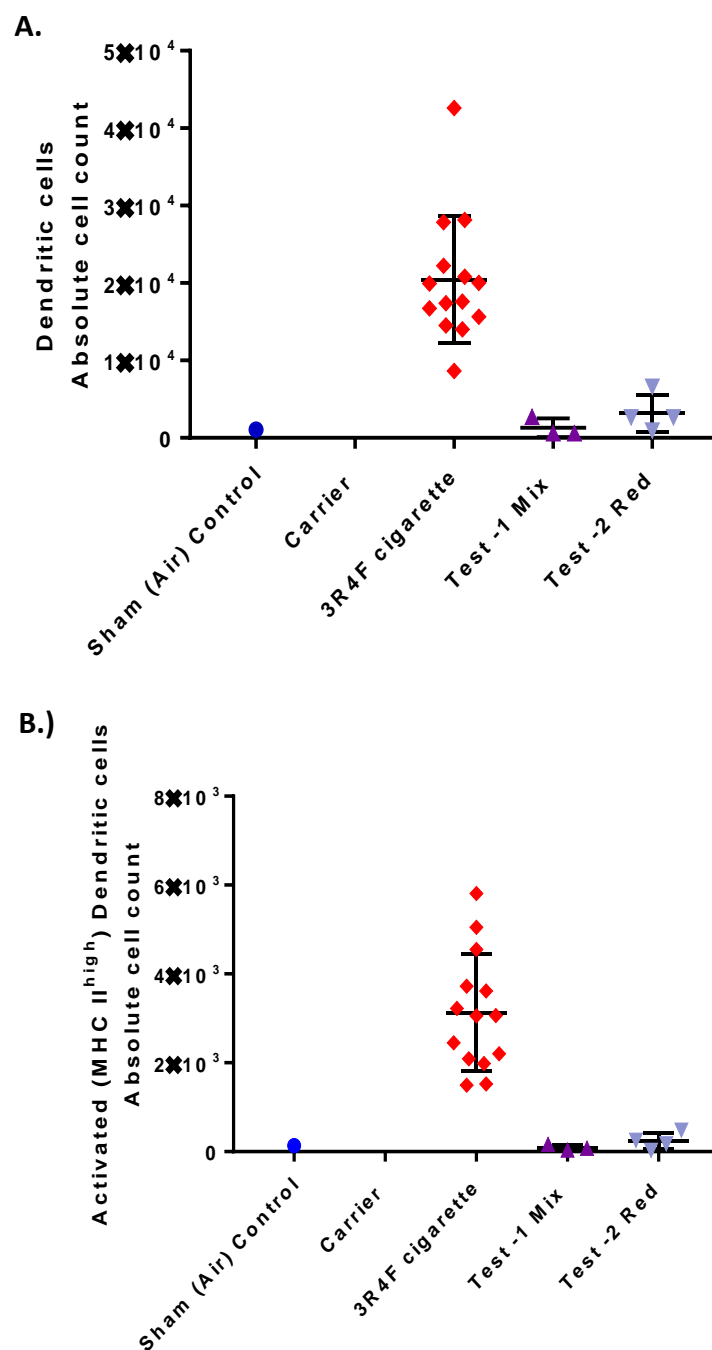

**Figure S7. BALF cytology: dendritic cells**

**A)** Number of Dendritic cells recovered after bronchial lavage

**B)** Number of activated (MHC II<sup>high</sup>) Dendritic cells recovered after bronchial lavage

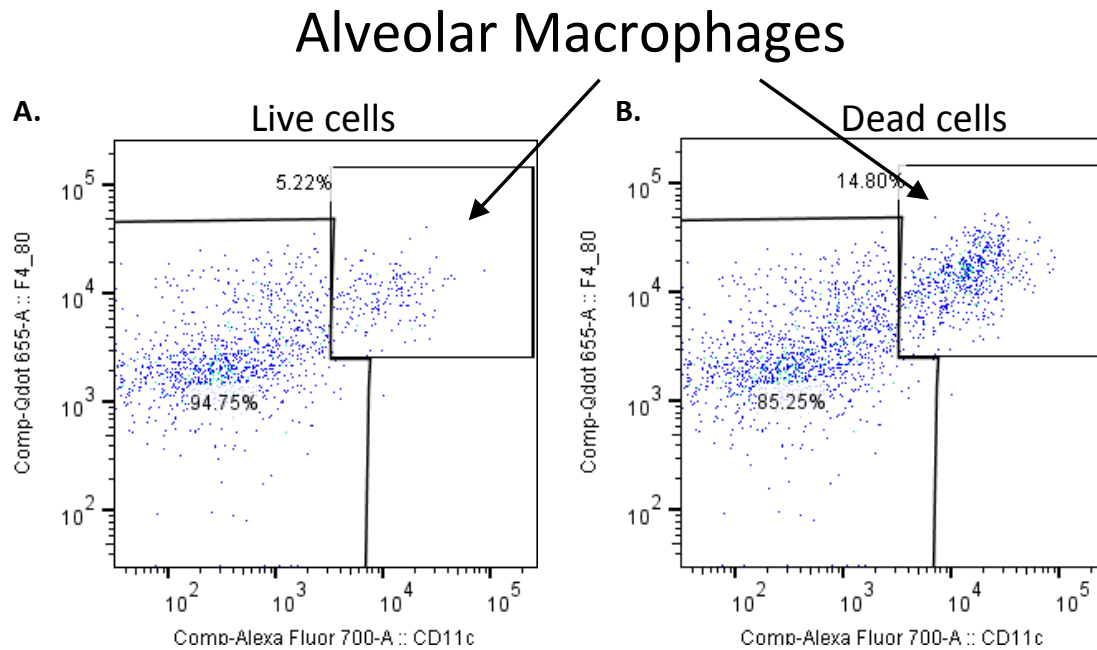

**Figure S8. BALF cytology: density plots**

Example live and dead cell populations gated for BALF alveolar macrophages from the 3R4F group

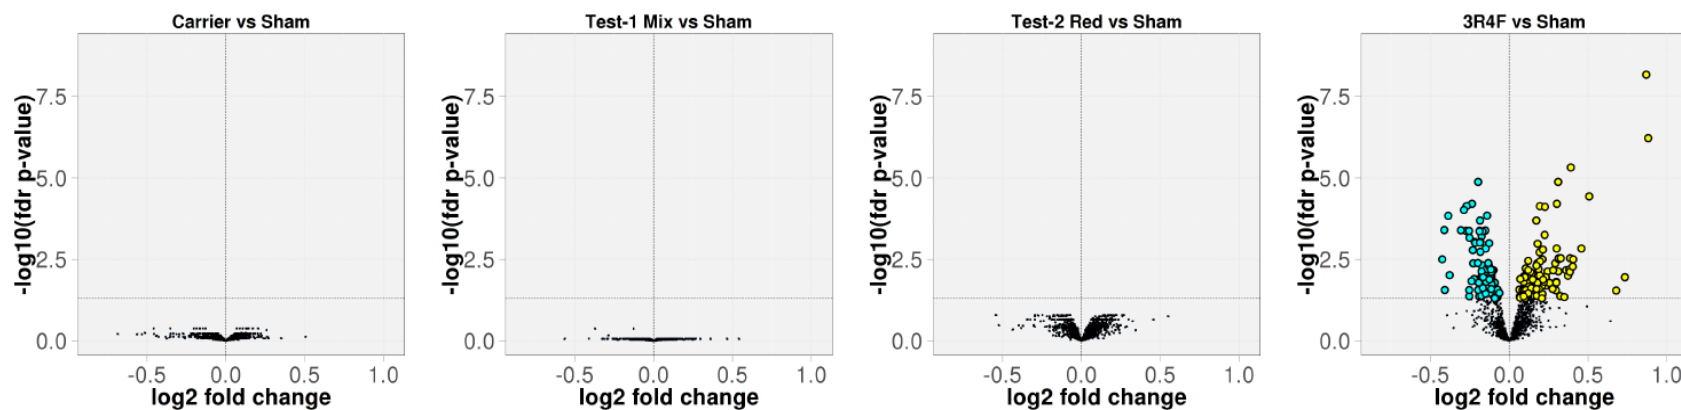

Figure S9. Volcano plots representing the changes in protein abundances in the lung

Volcano plots representing the protein response profiles in the lung. For each protein, the protein expression change, calculated as the log<sub>2</sub> fold-change, is plotted on the x-axis and the statistical significance, proportional to the negative log<sub>10</sub>-adjusted *p*-value, is plotted on the y-axis. Yellow and blue dots highlight proteins that are statistically significantly up- and down-regulated, respectively



**[SEPARATE PDF]**

**Figure S10. Comparison of differentially expressed genes between the contrasts.**

A) Differentially expressed genes in common based on FDR p-value  $<0.05$ . Correlation (Cor) coefficients are color coded (see key), the numbers of overlapping differentially abundant genes are indicated in each cell (with consistency of the change in direction indicated by the pie chart; see key), green stars indicate significance of a Fisher association test ( $p < 0.05$ ).

B) Heatmap of the gene fold-changes ( $\log_2$ , normalized to the maximum observed absolute value) which are significant (FDR $<0.05$ ) in at least one comparison.
