# Supplementary material
Source: publisher figshare collection journal article supplement (https://tandf.figshare.com/articles/dataset/_/9938042)

AL3A1/SFETFSHR [fmol/uL]

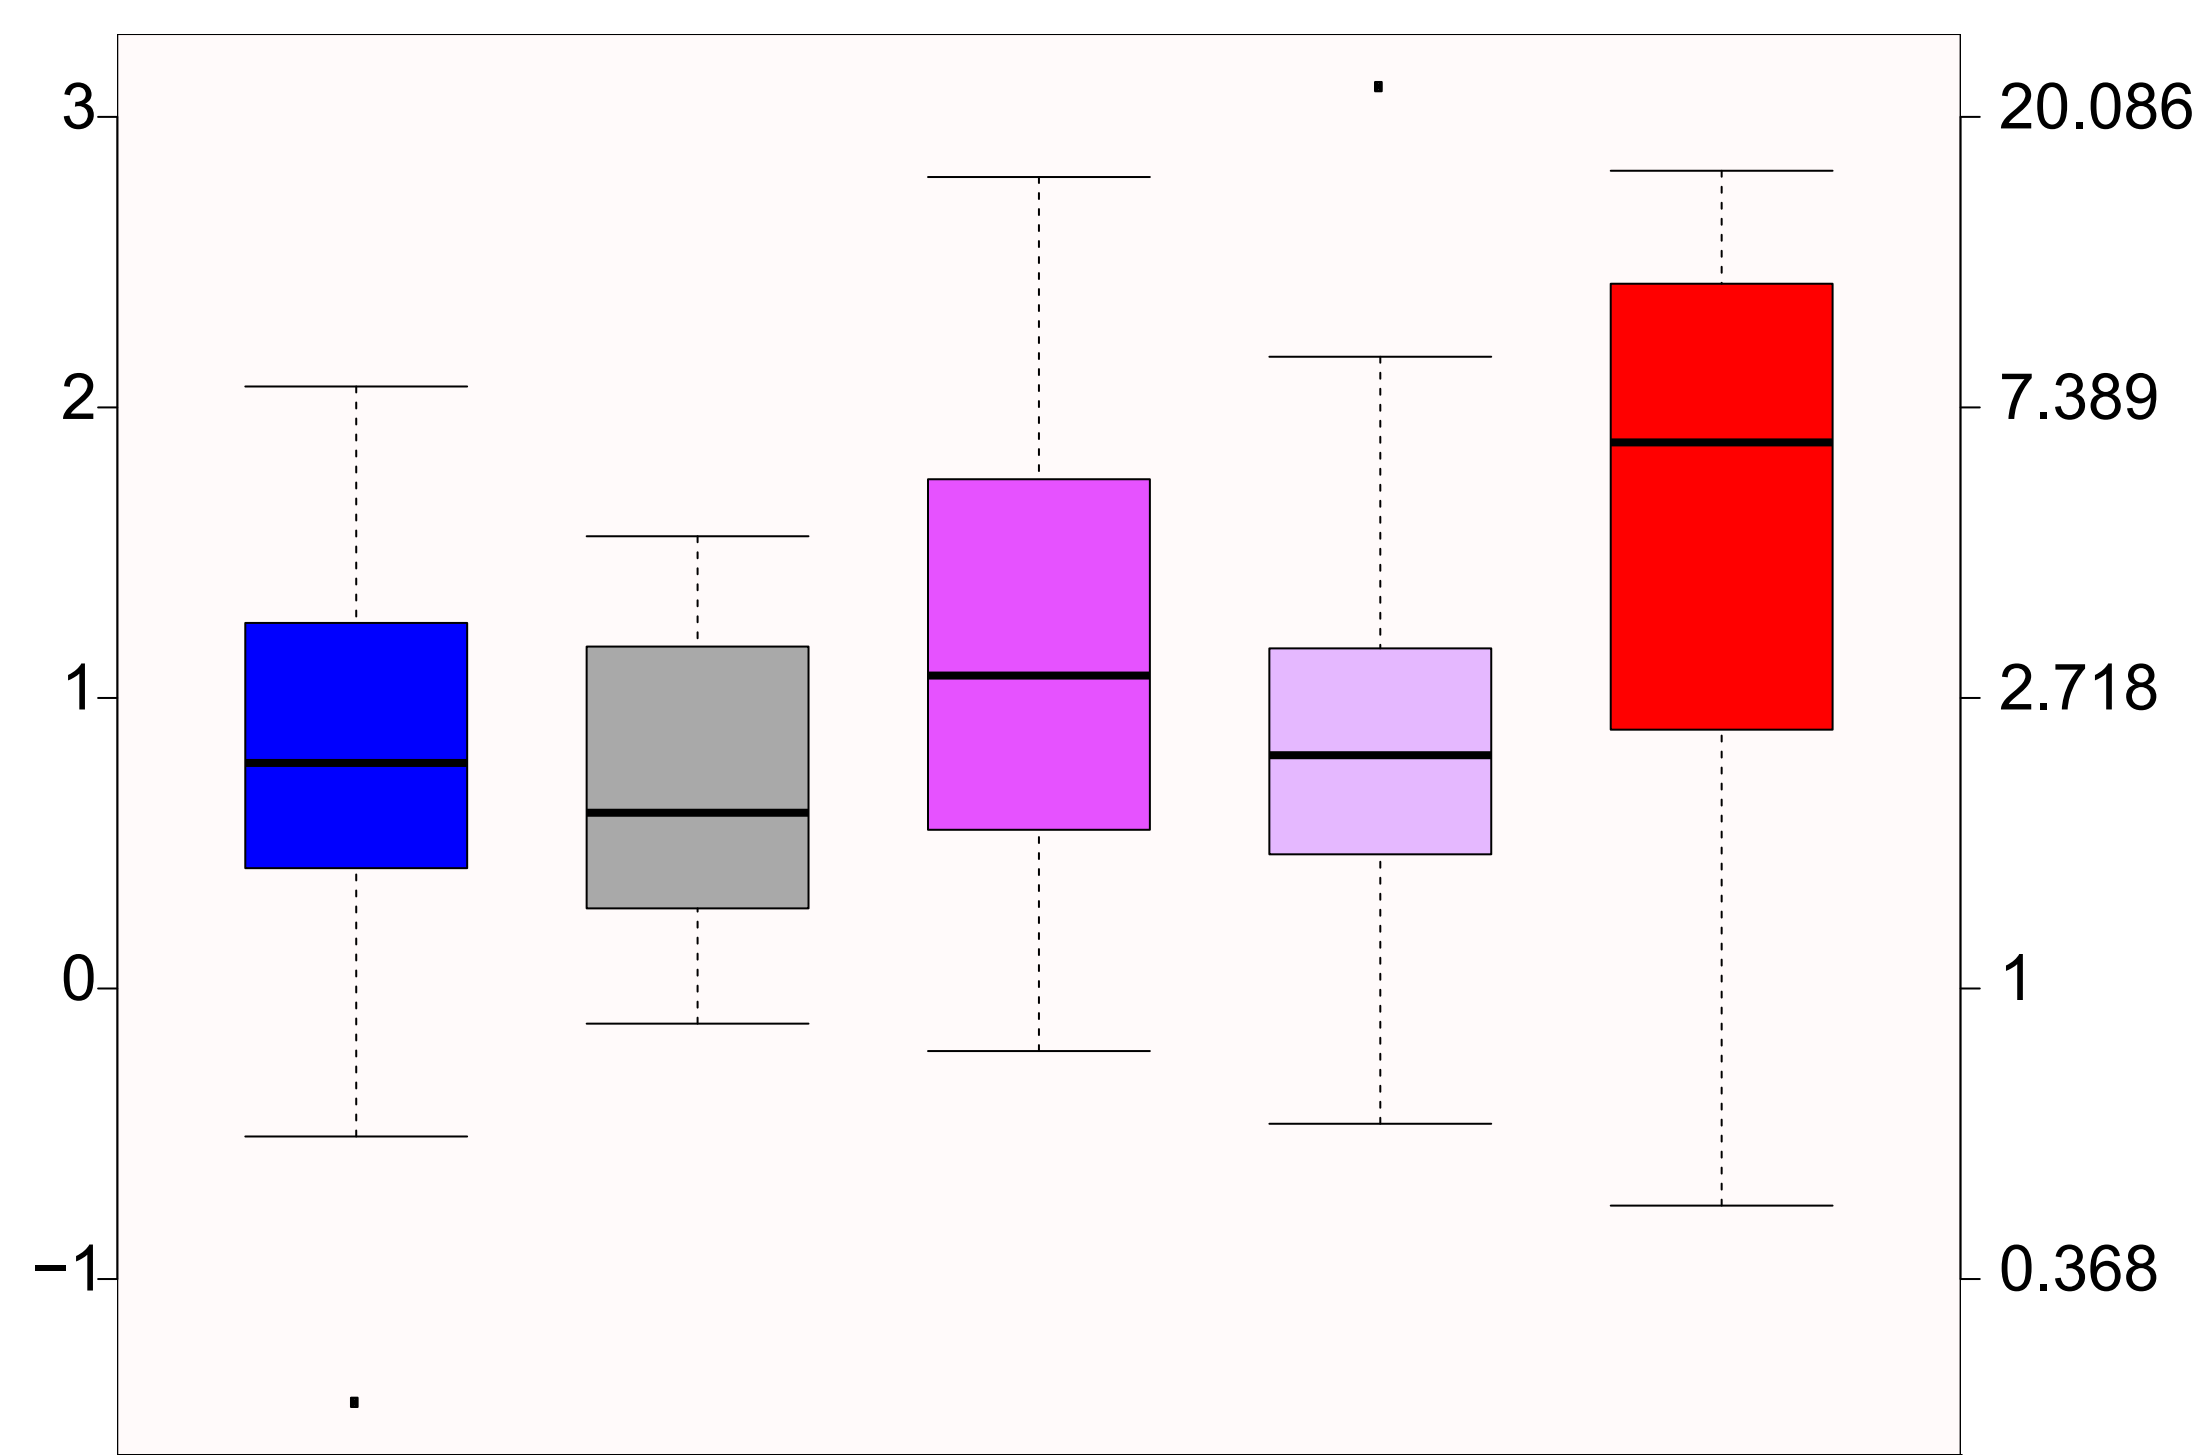

AL3A1/VEQLEALQR [fmol/uL]

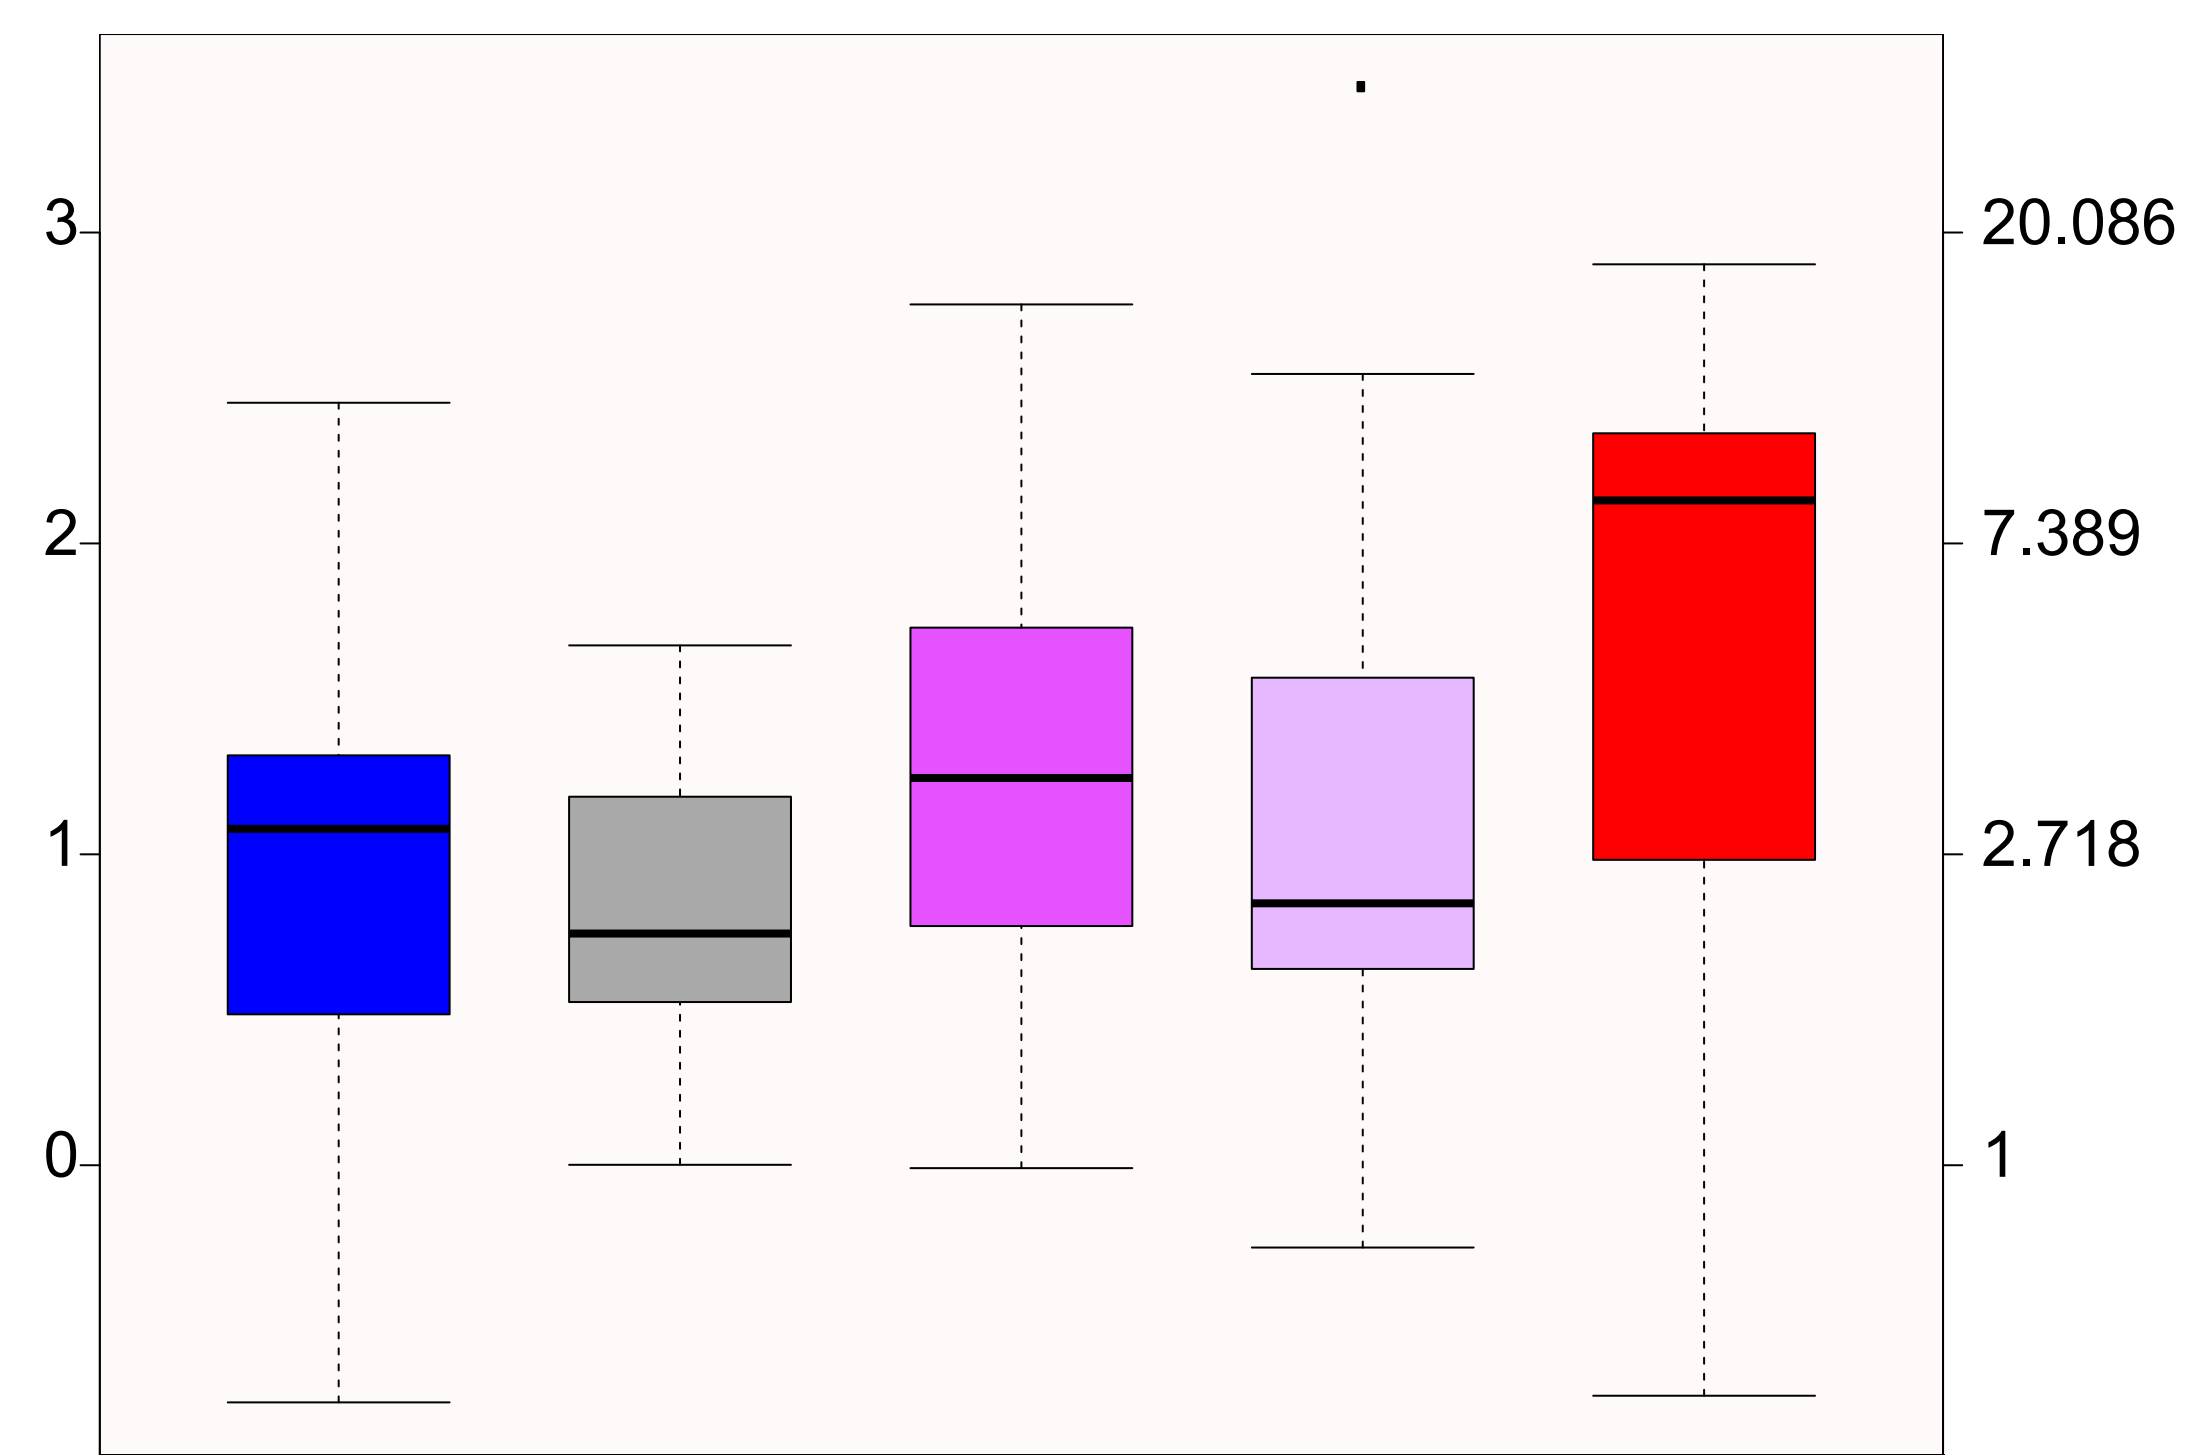

CXL15/ATVGPITNR [fmol/uL]

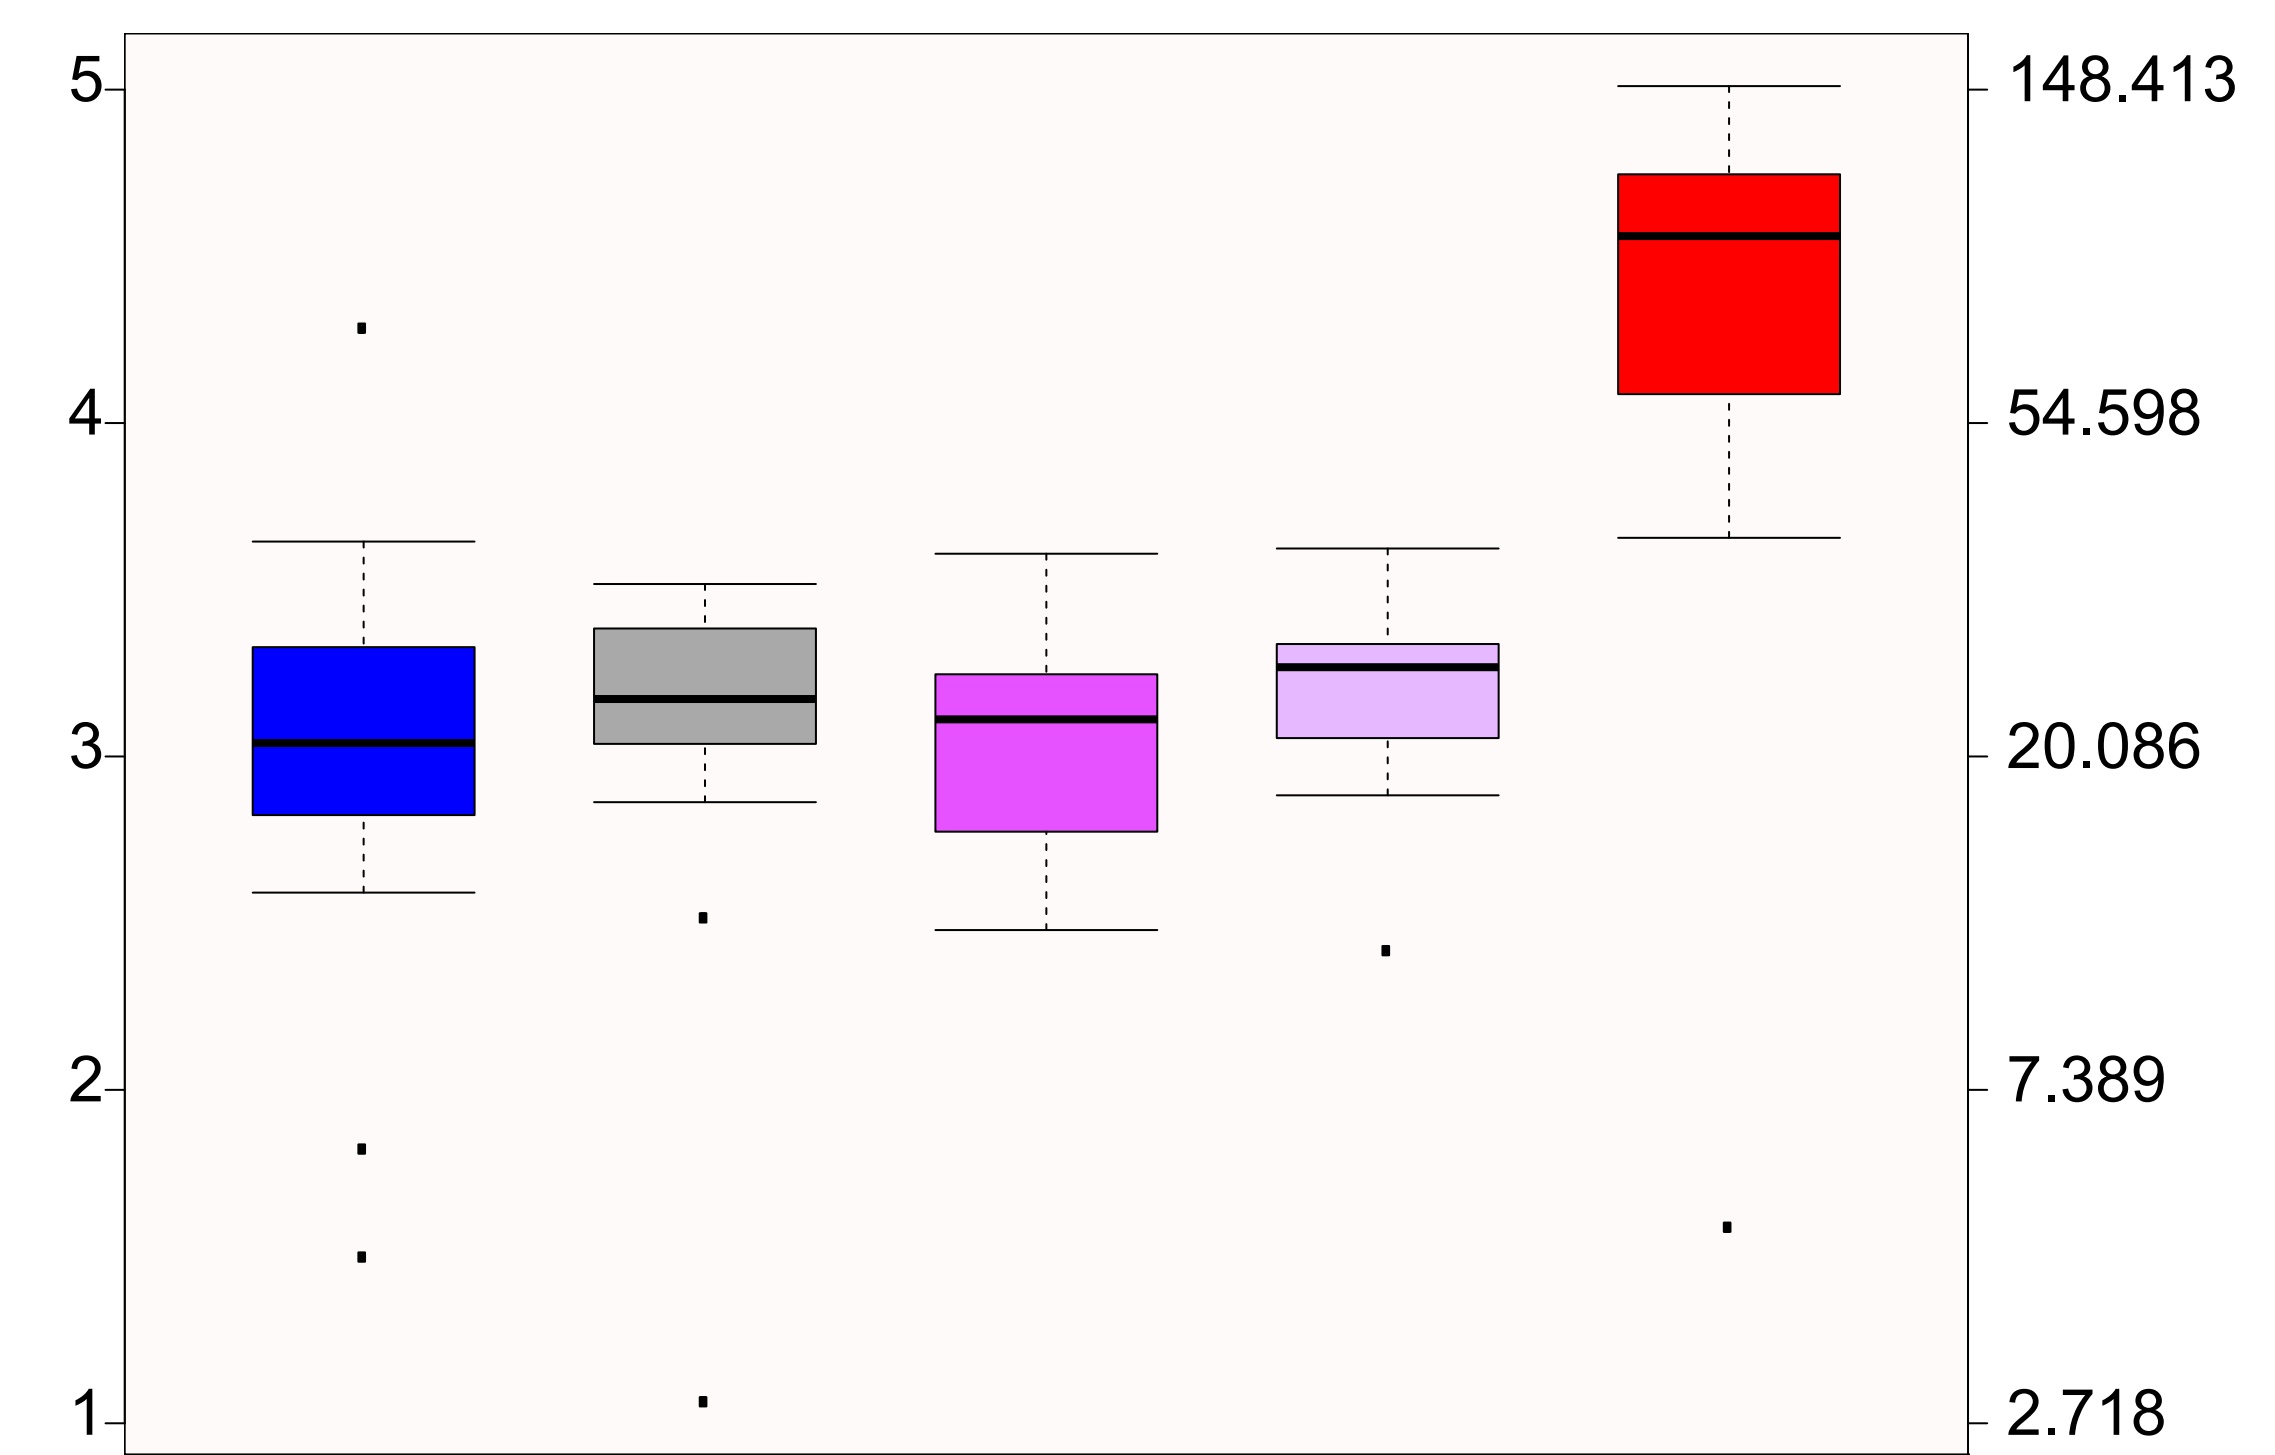

FIBB/QDGSVDFGR [fmol/uL]

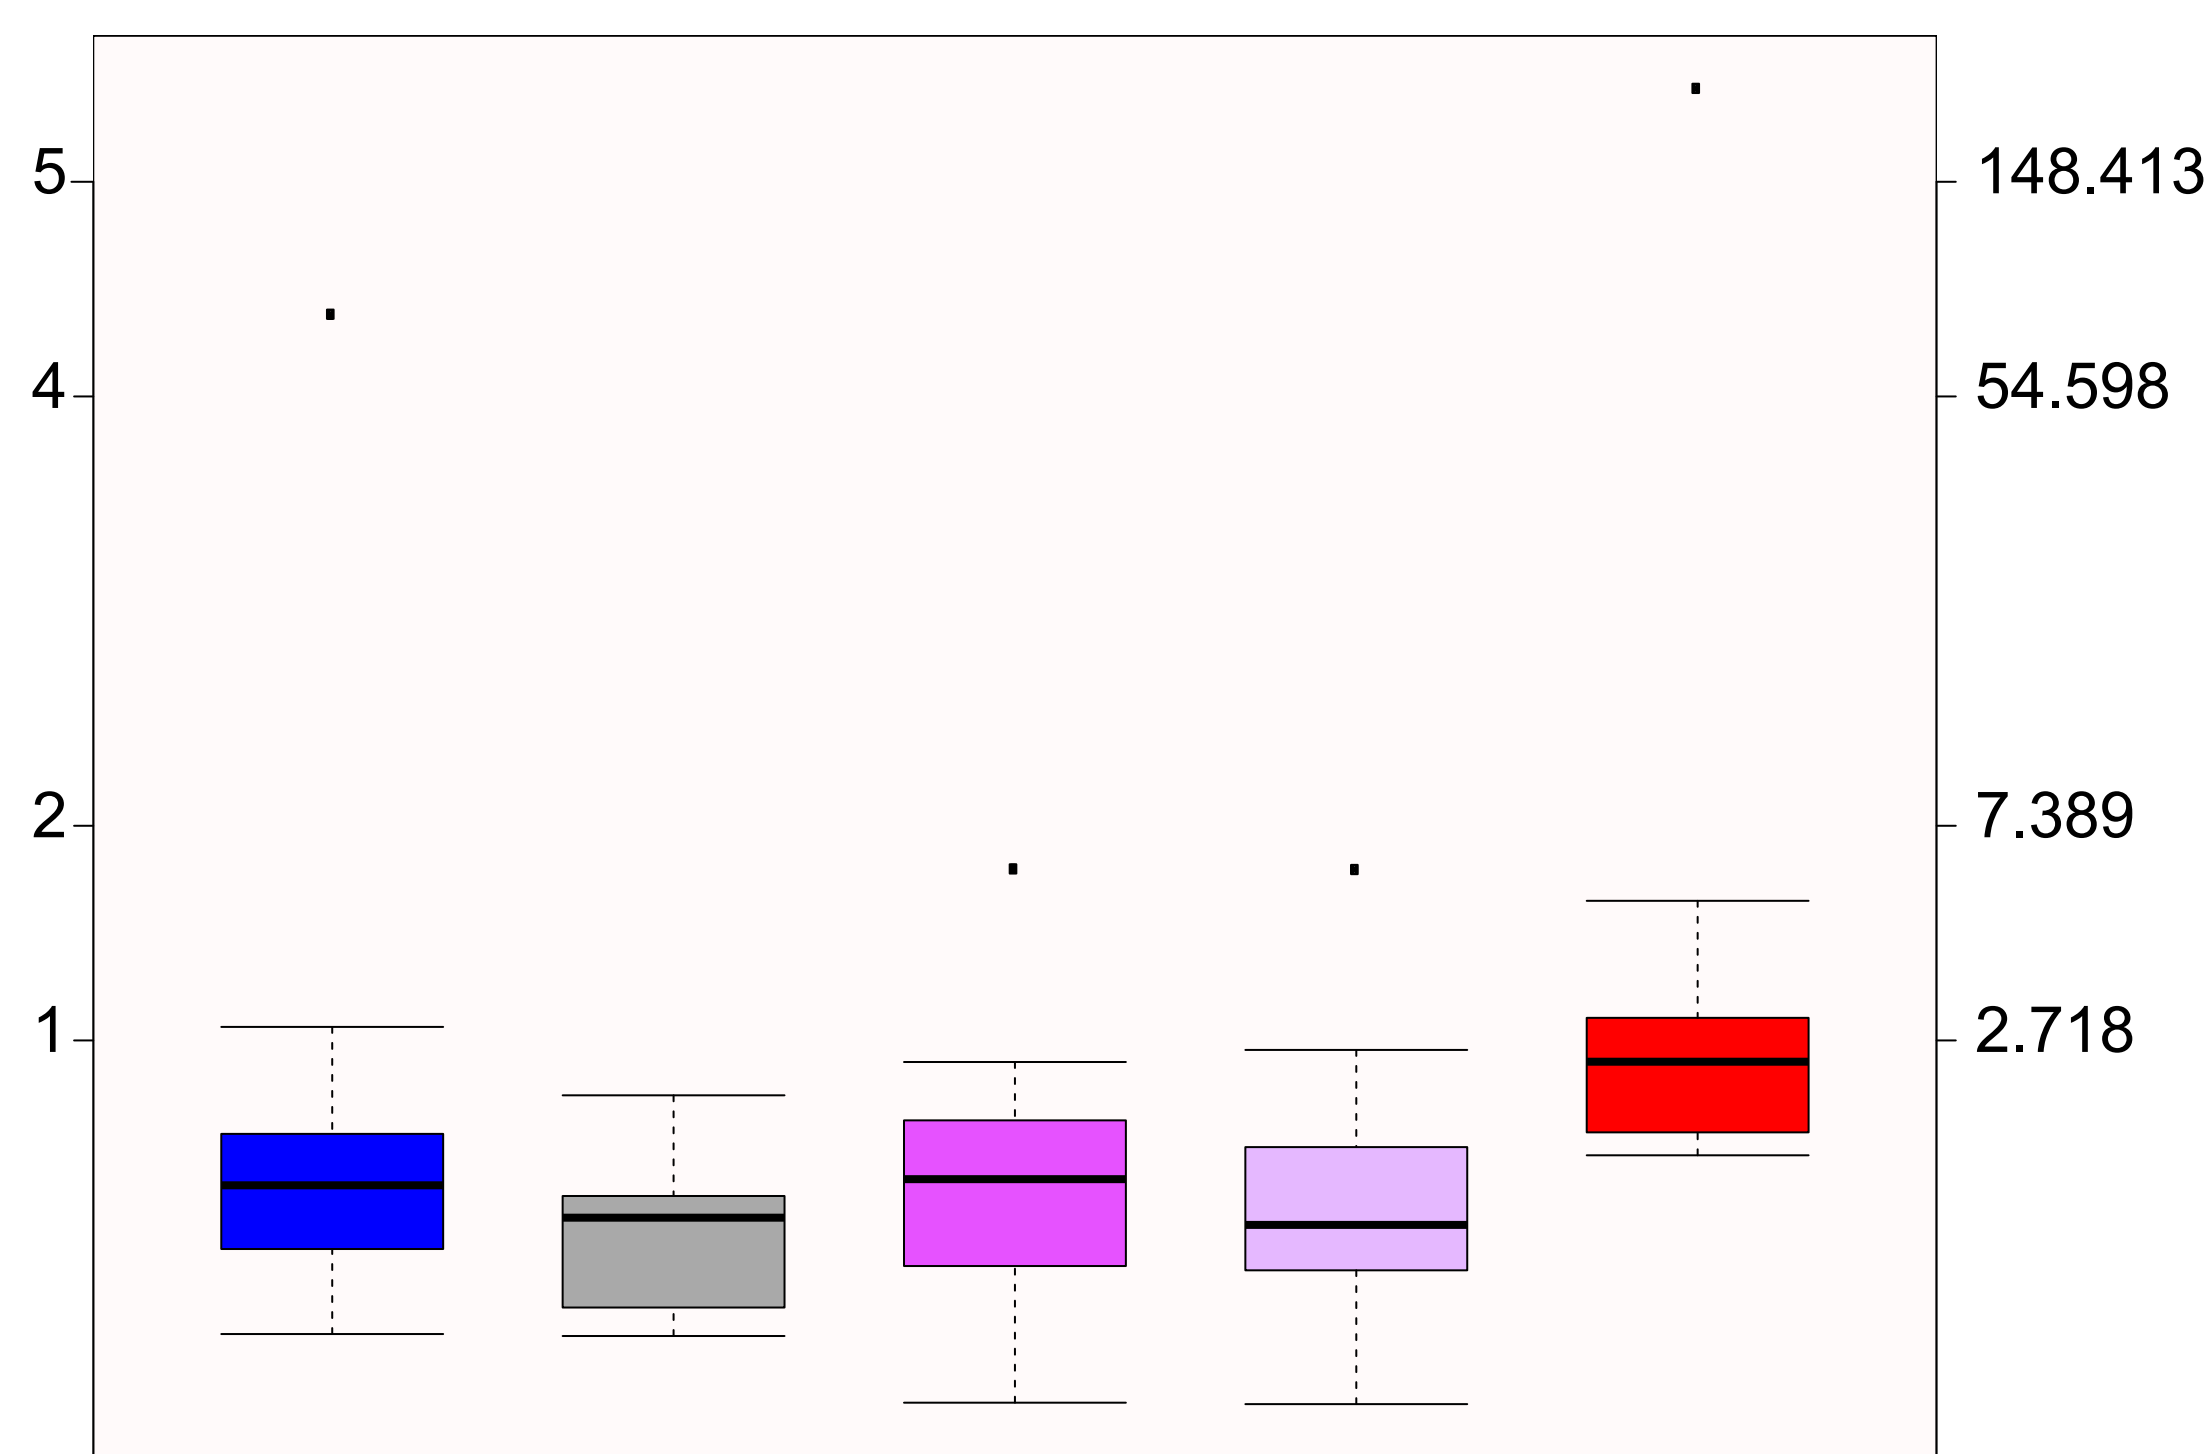

ILEUA/FQSLNAEVSK [fmol/uL]

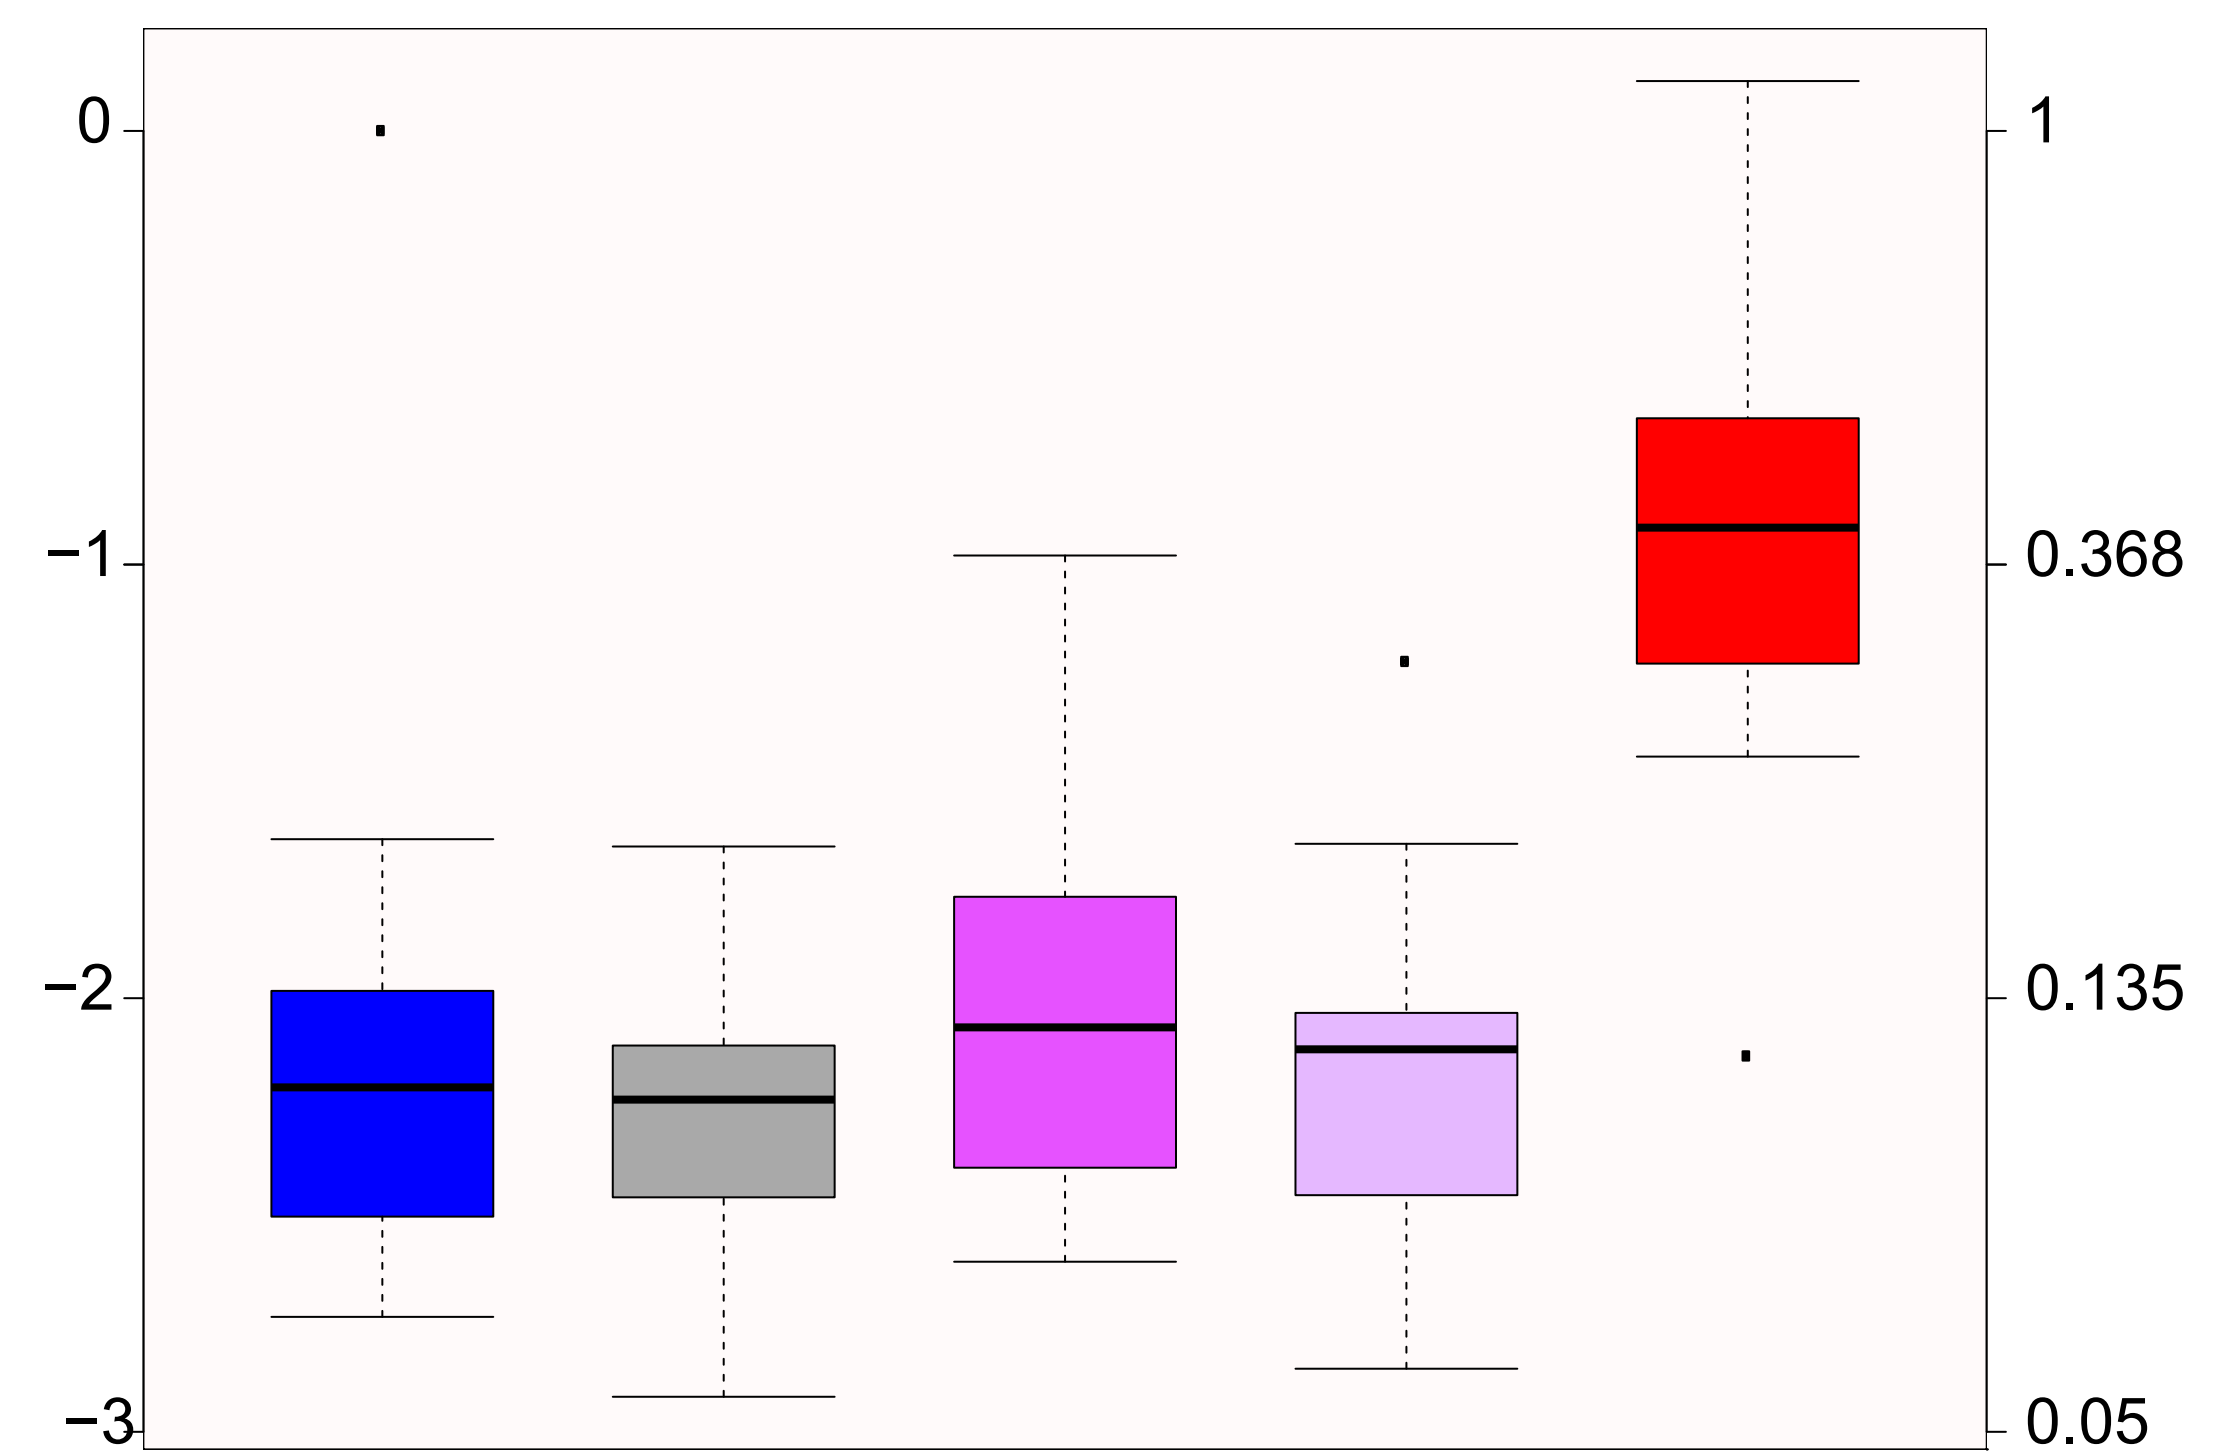

SODE/VGLTASLAGPHAILGR [fmol/uL]

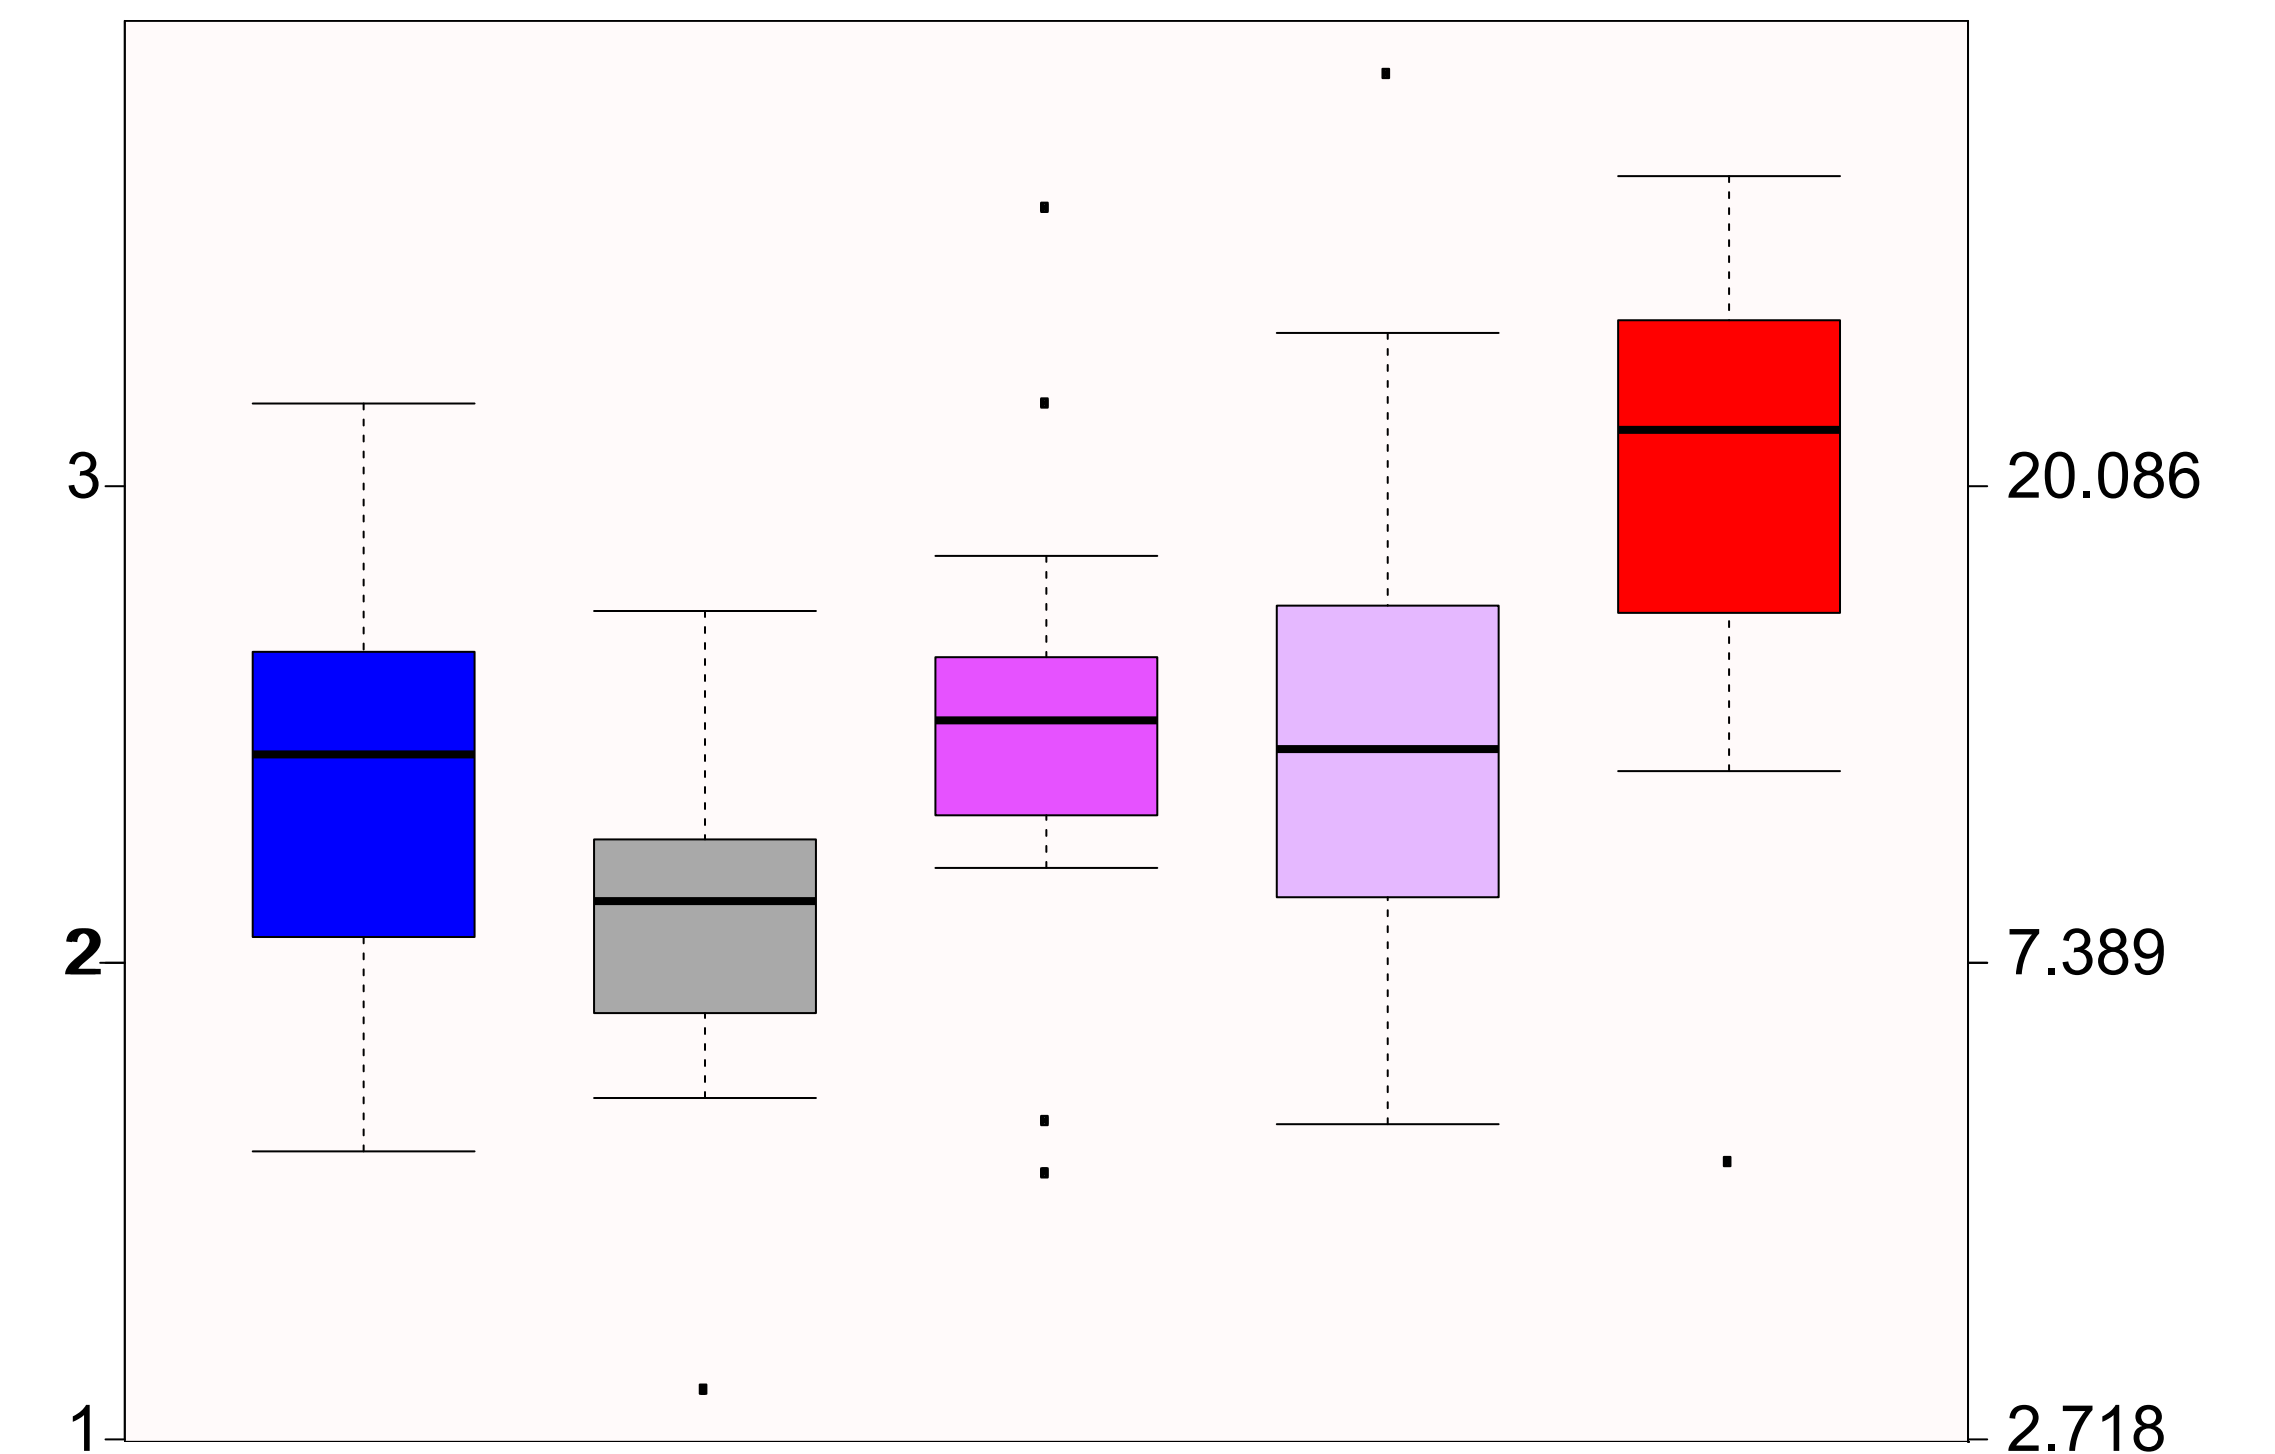

SFTPD/AALFPDGR [fmol/uL]

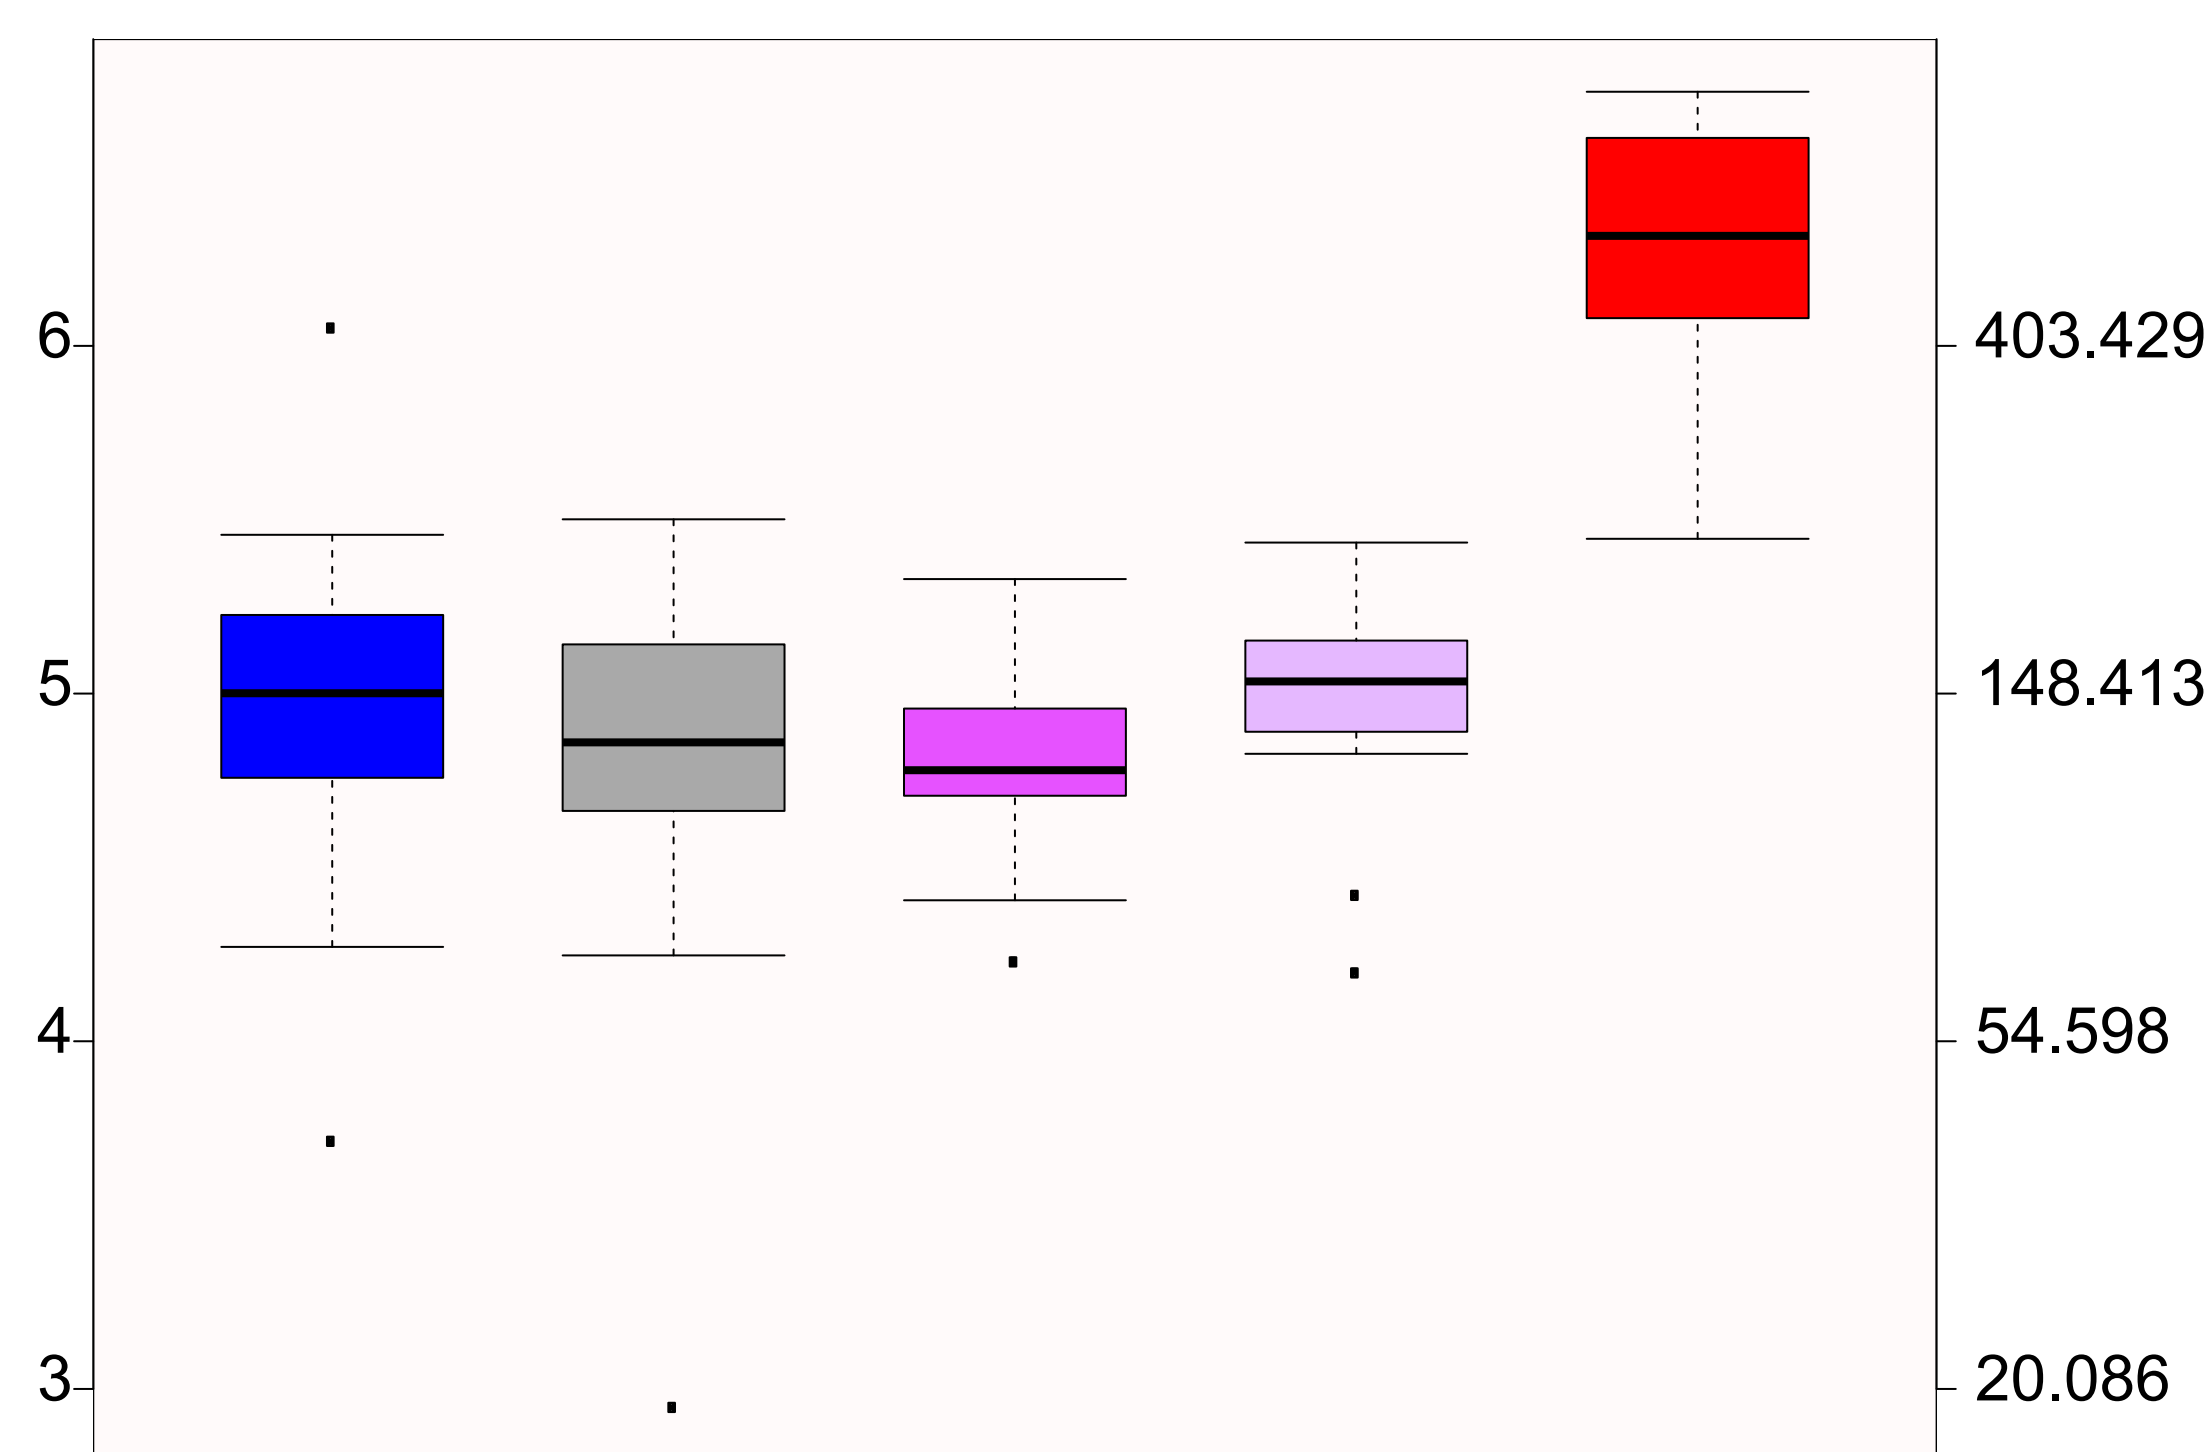

VWF/LSSETFGFAAR [fmol/uL]

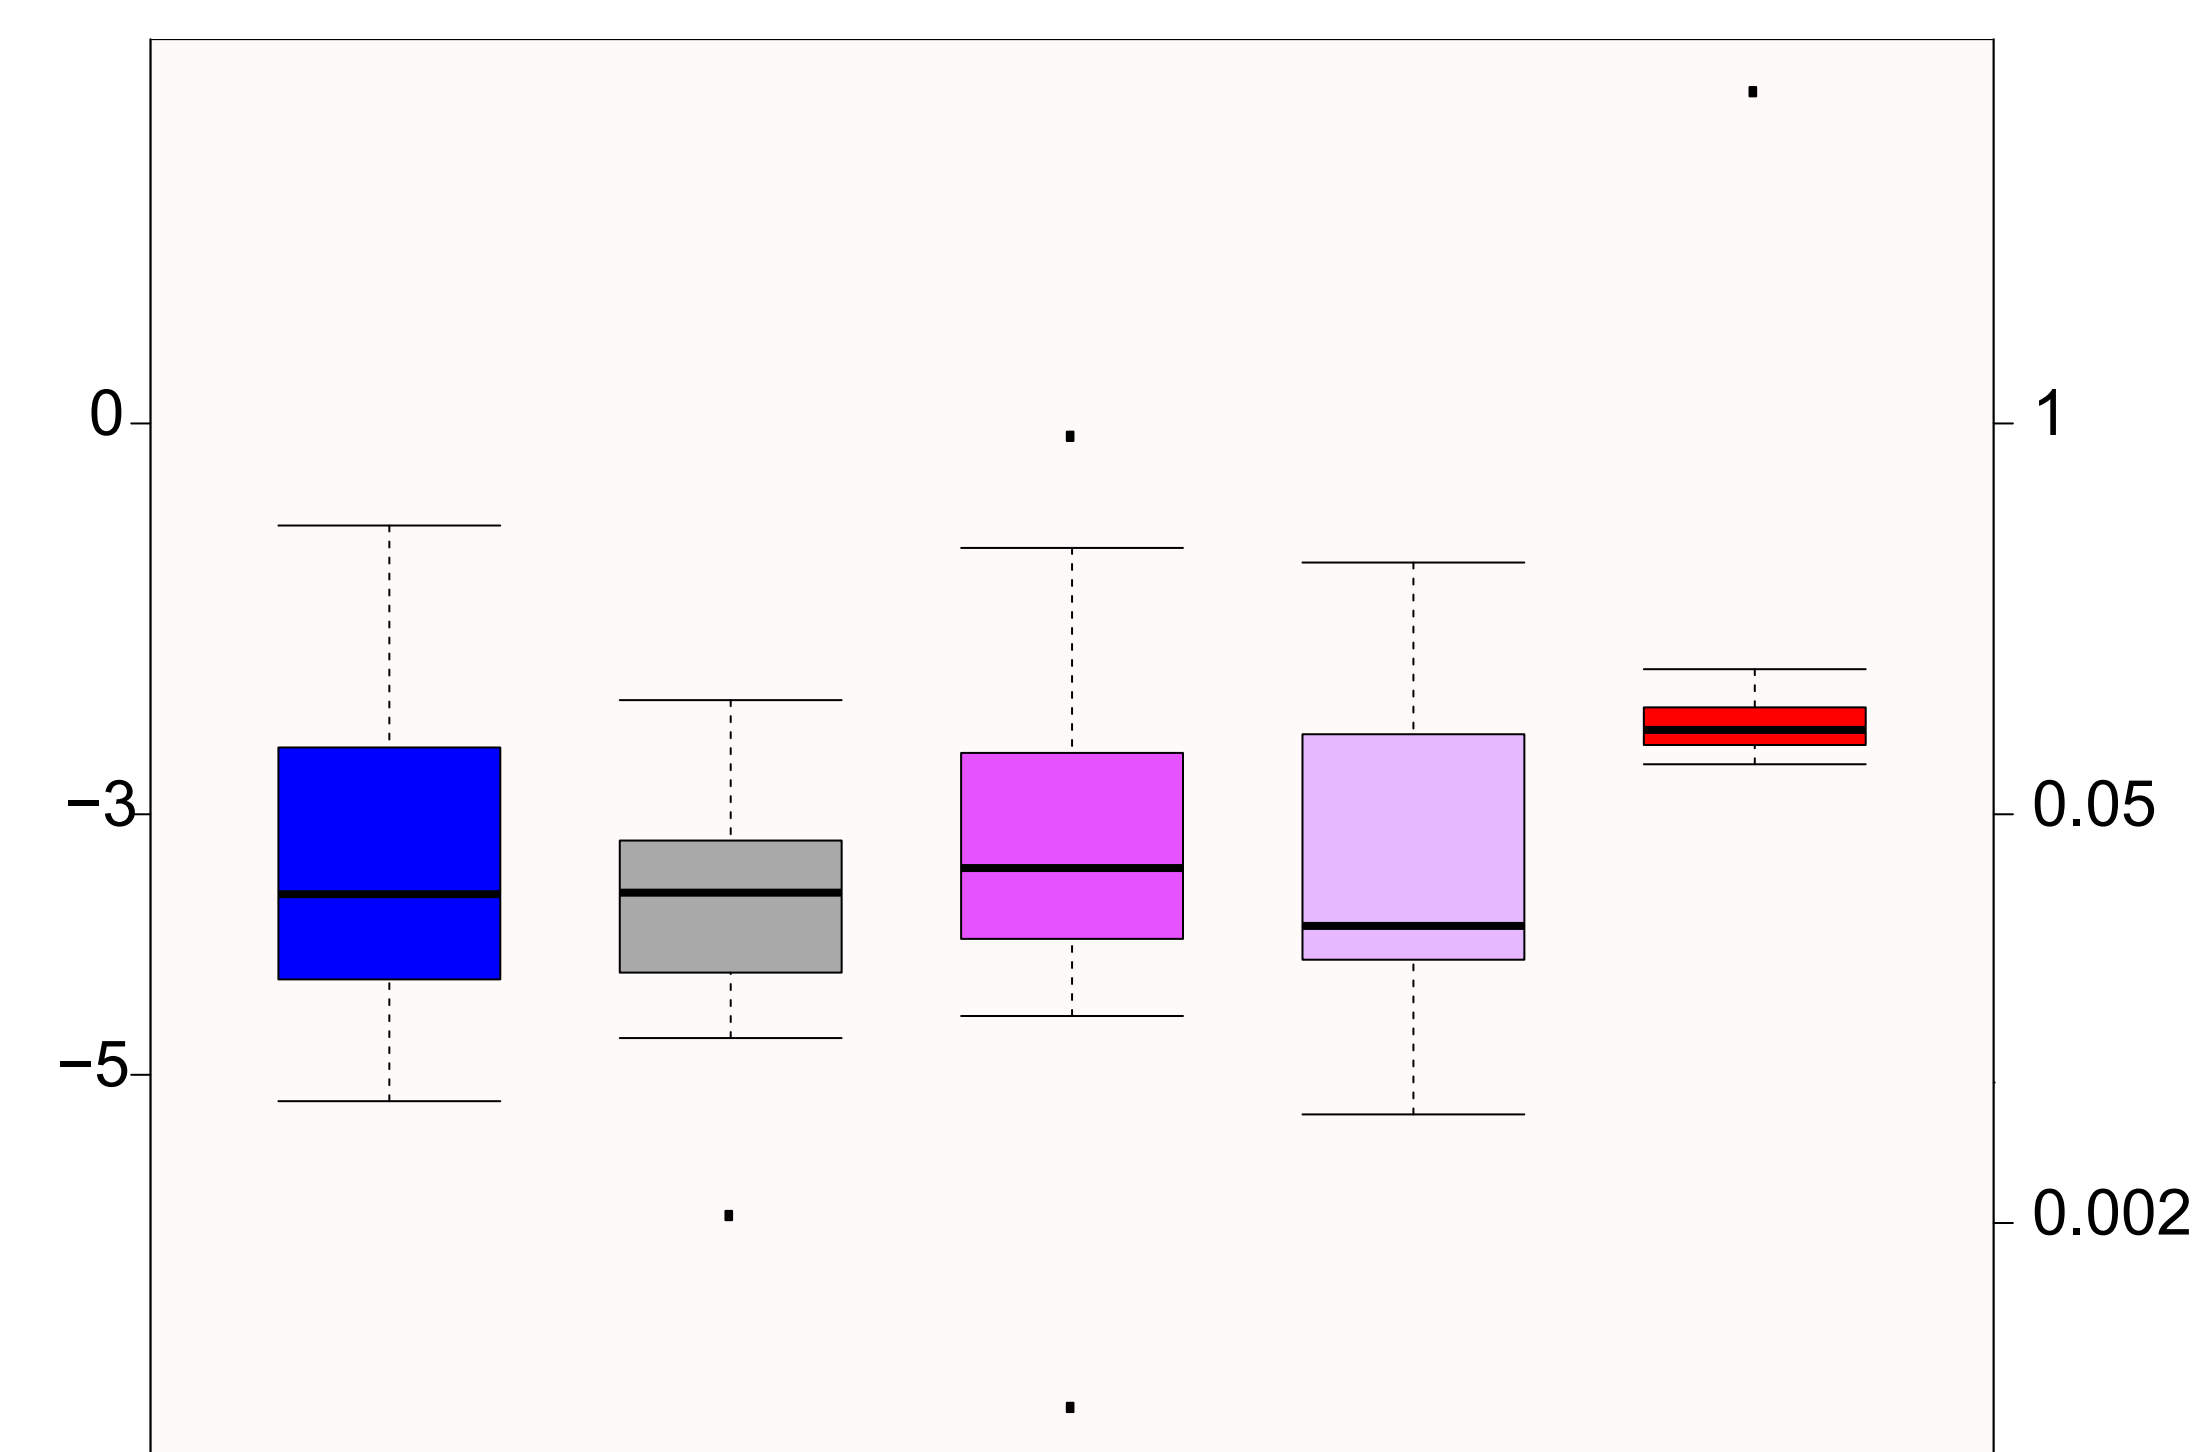

CATS/TLPDTVDWR [fmol/uL]

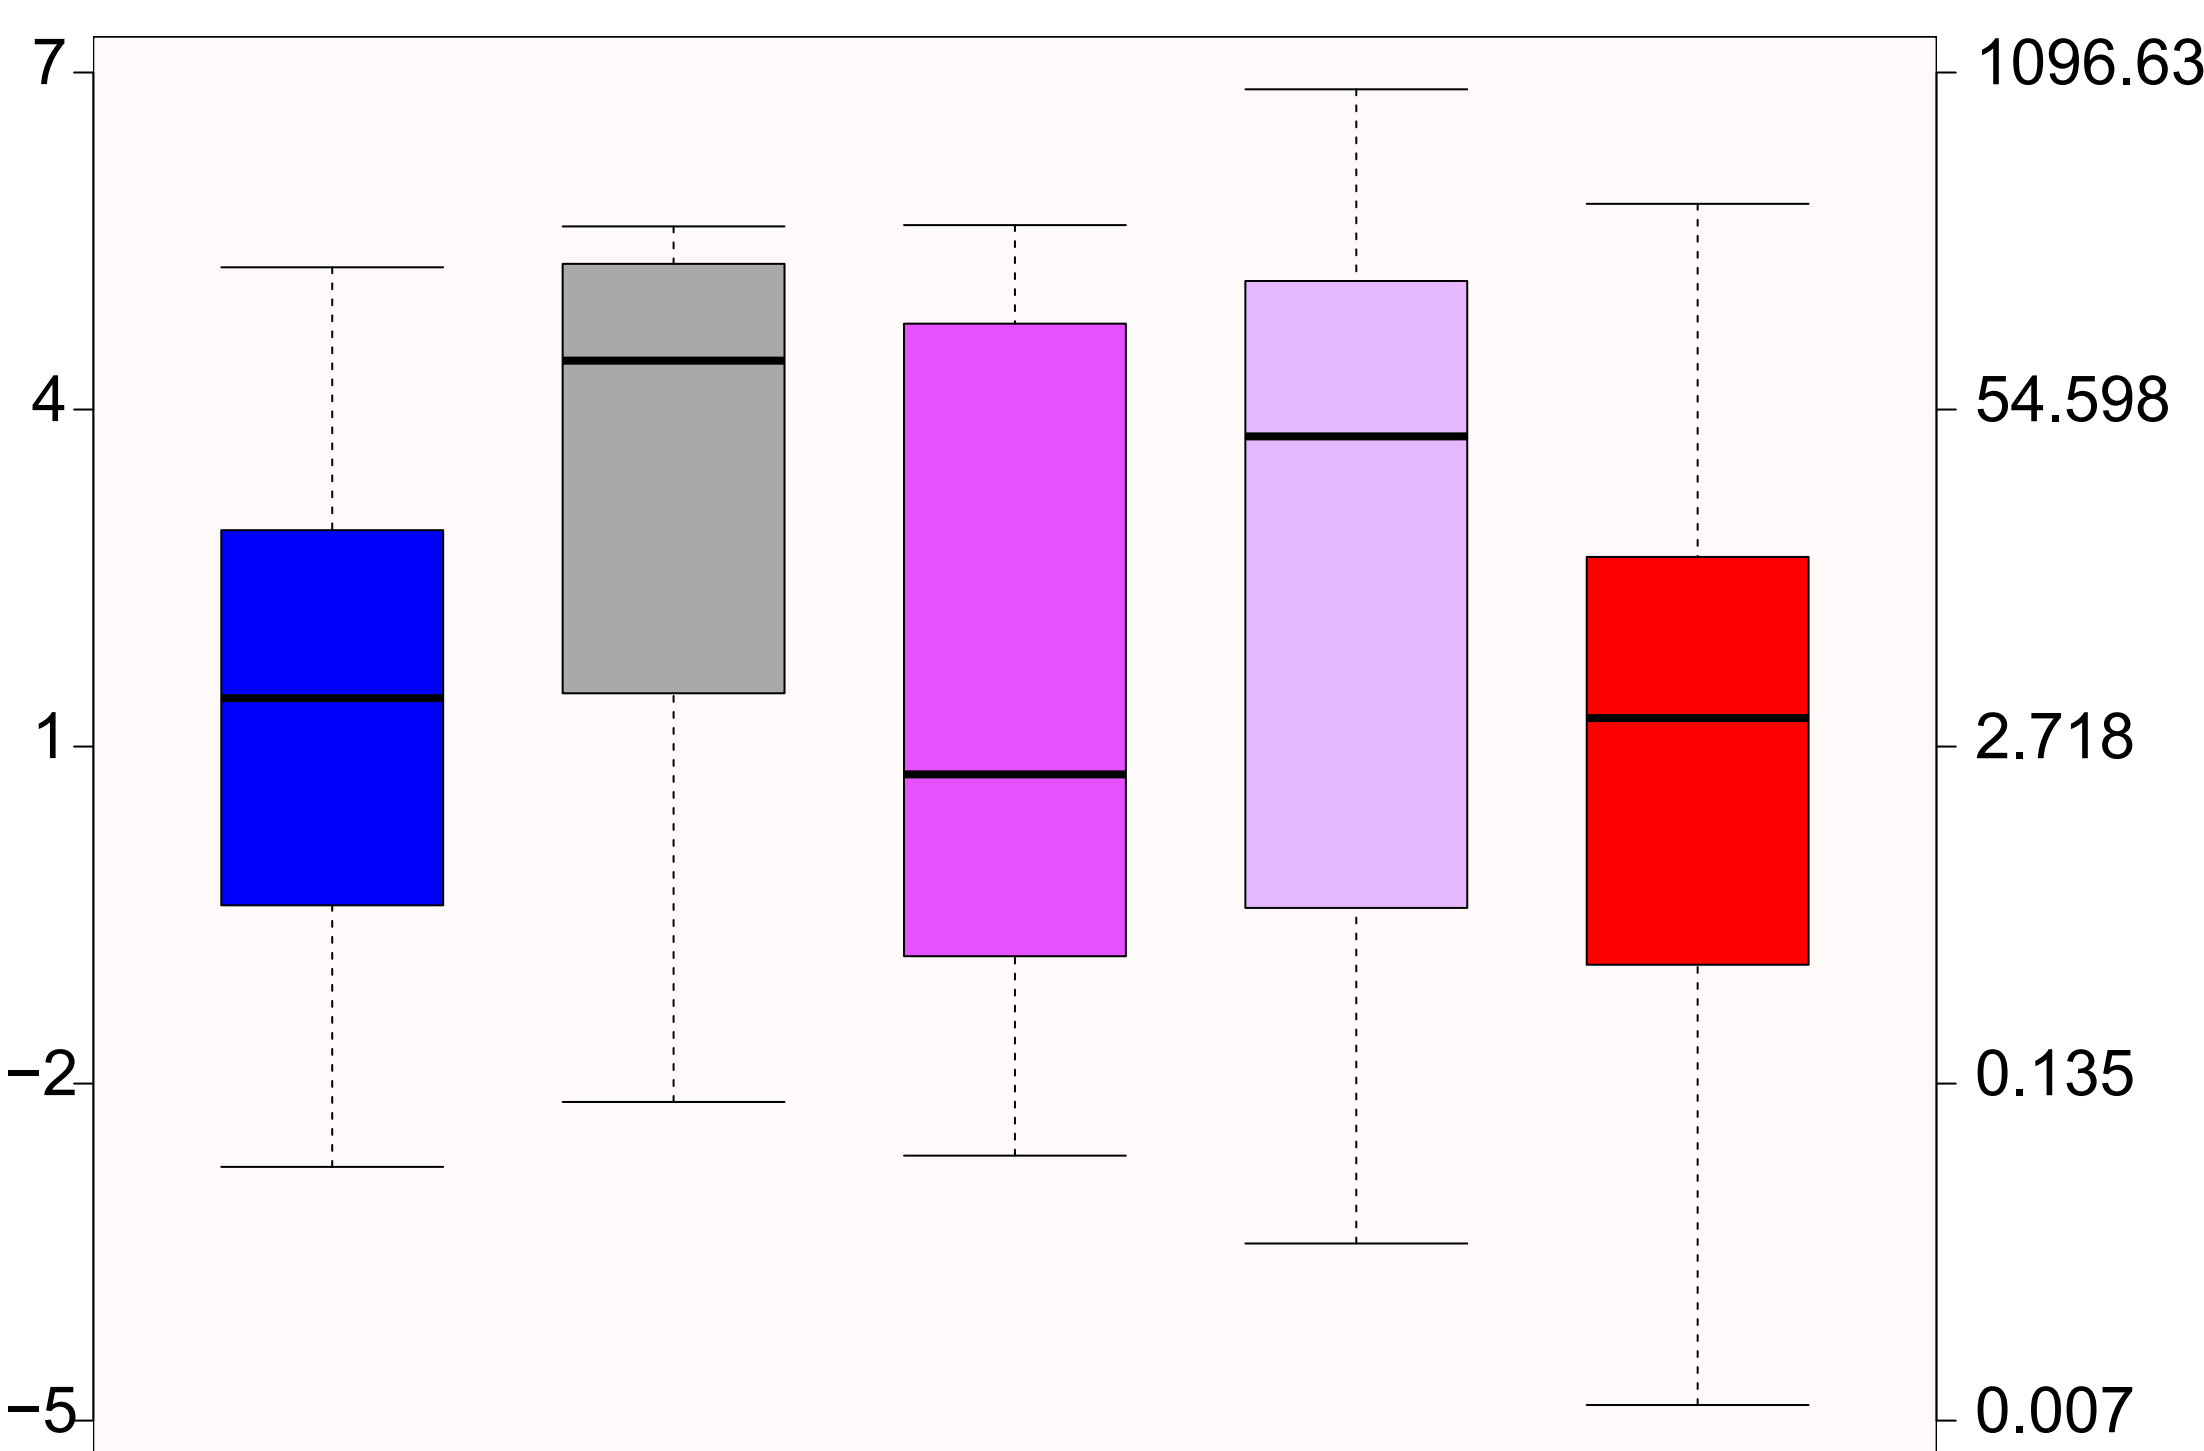

PERM/IICDNTGITTVSK [fmol/uL]

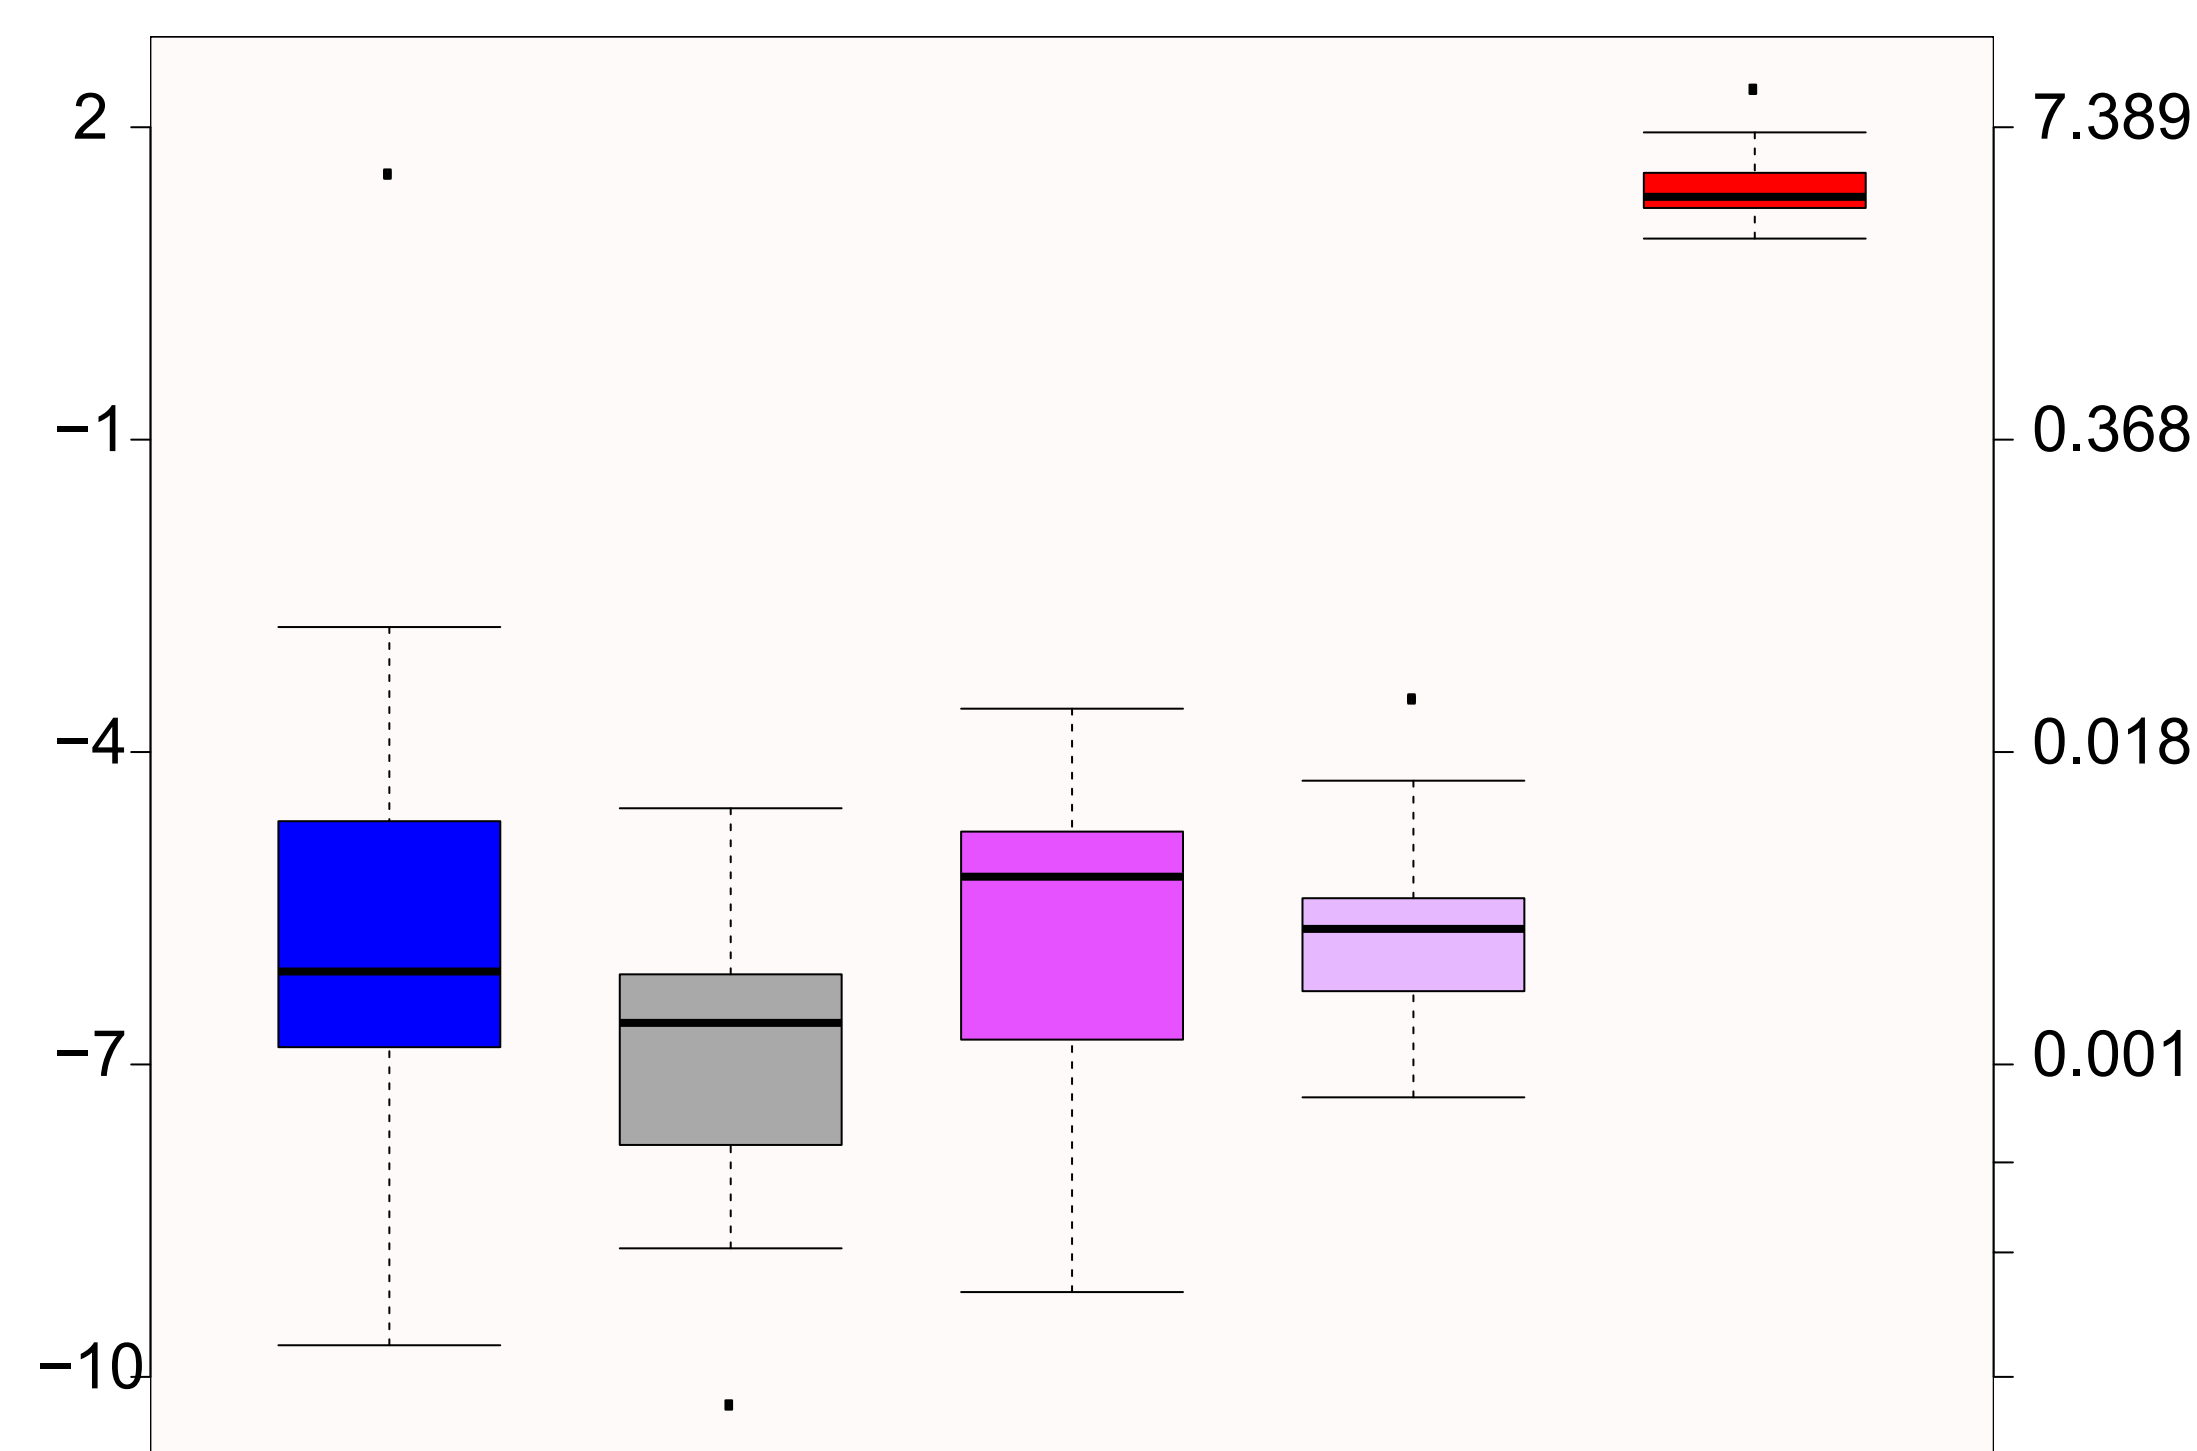

UTER/LVDTLQPQETR [fmol/uL]

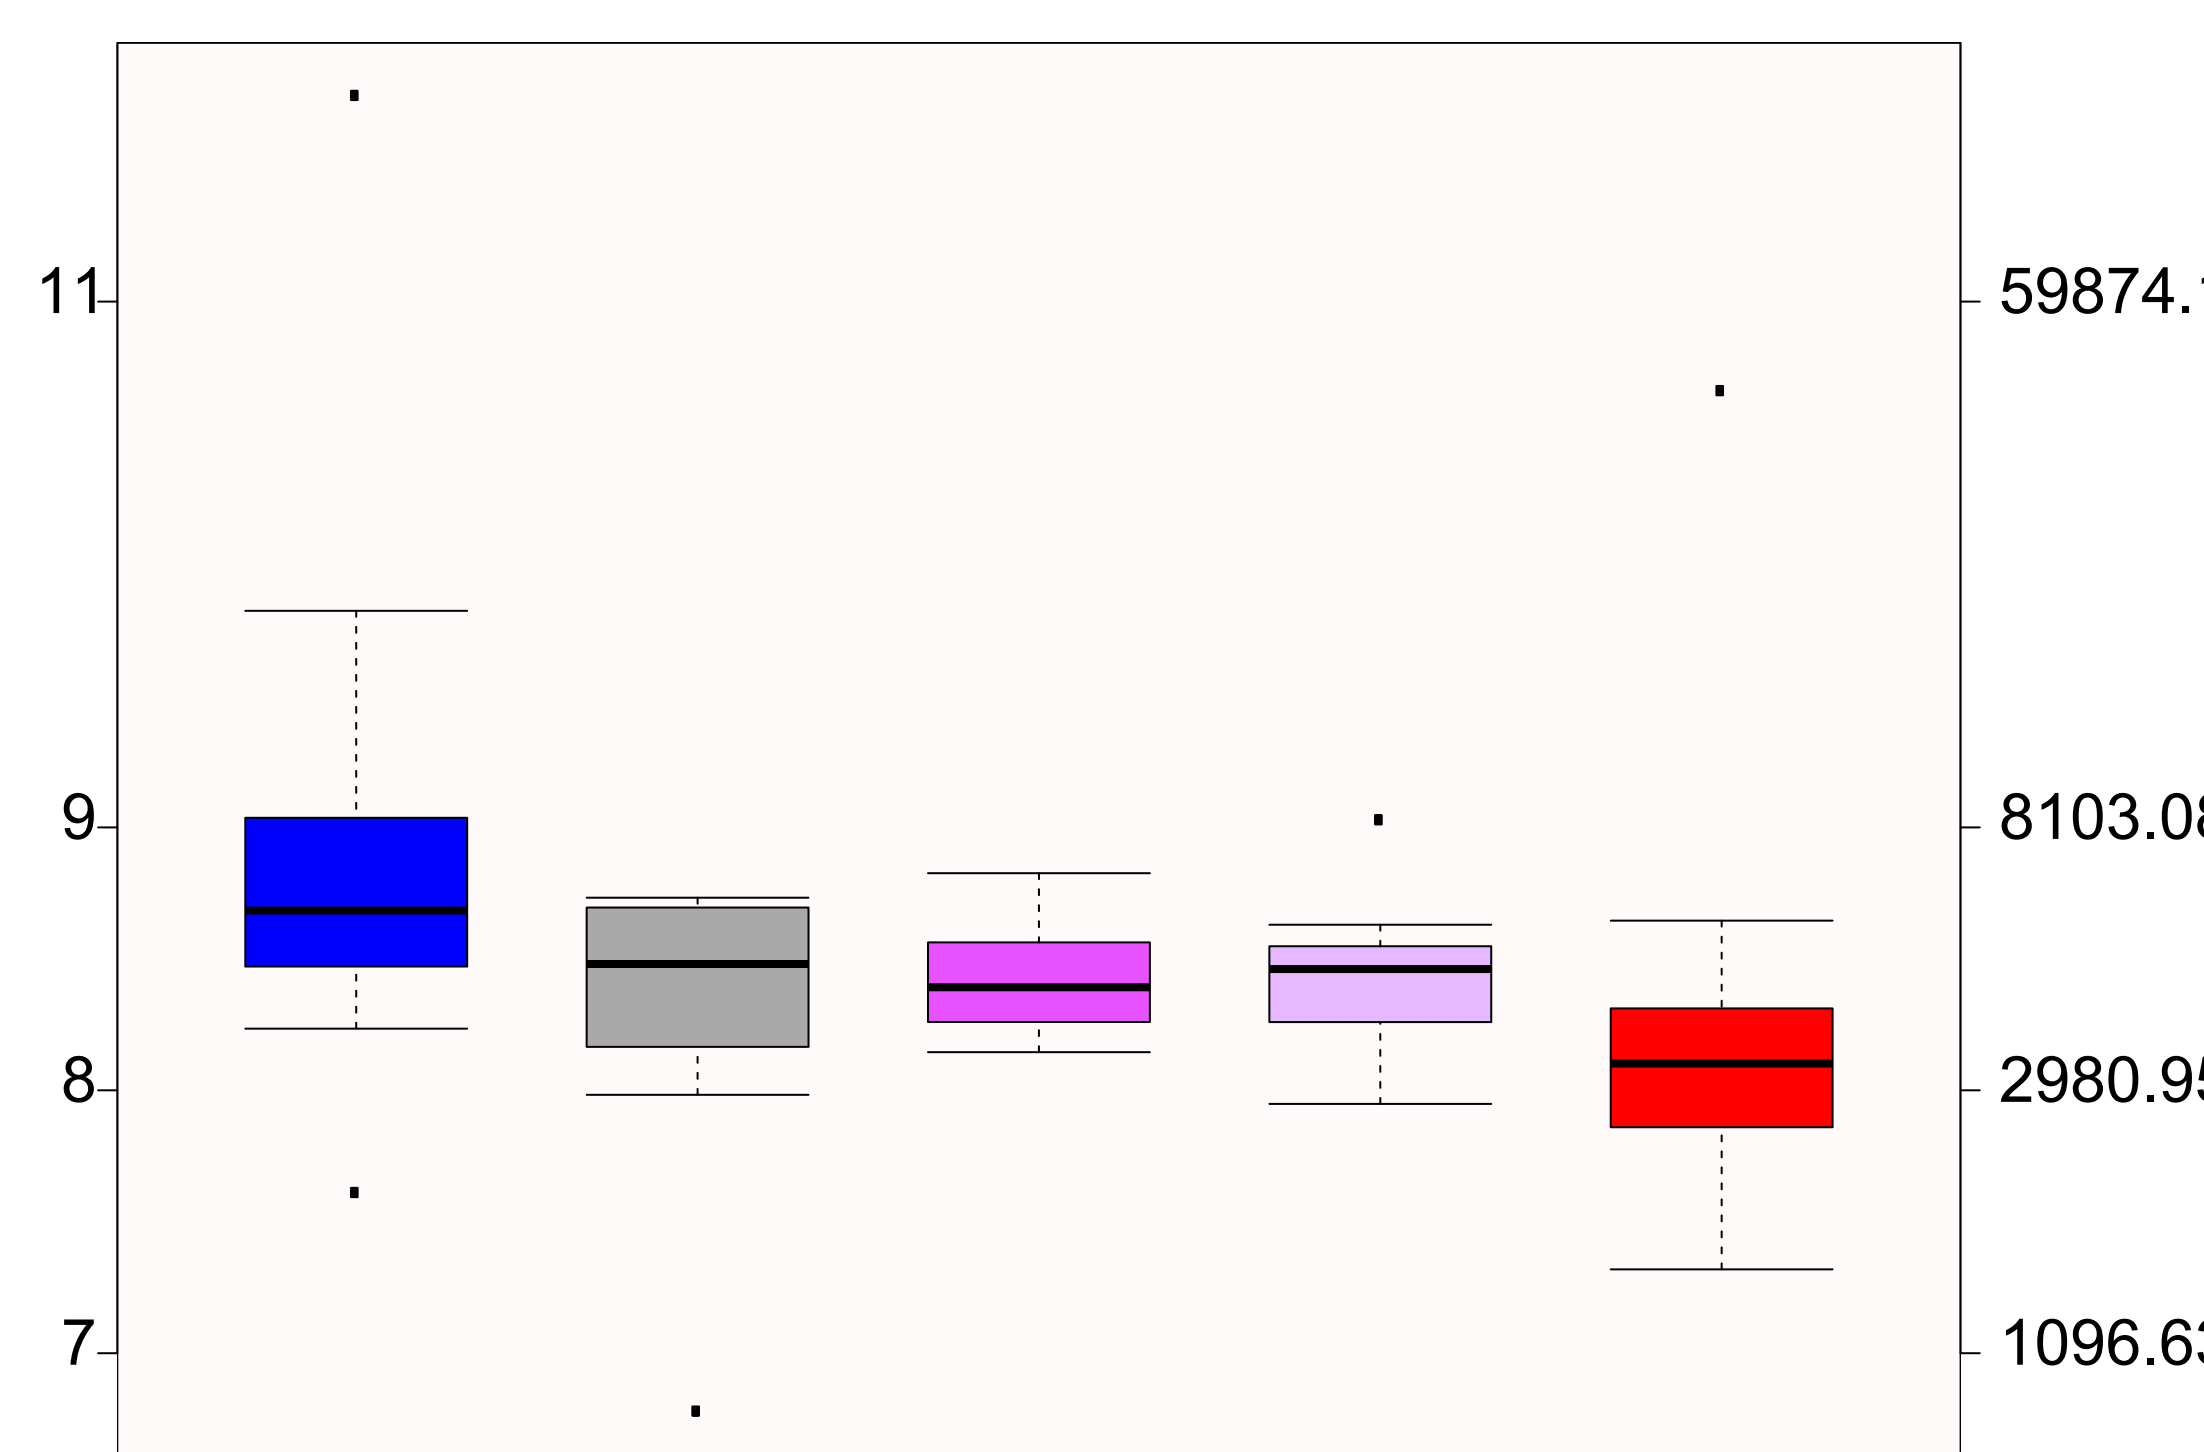

IC1/FPVFMGR [fmol/uL]

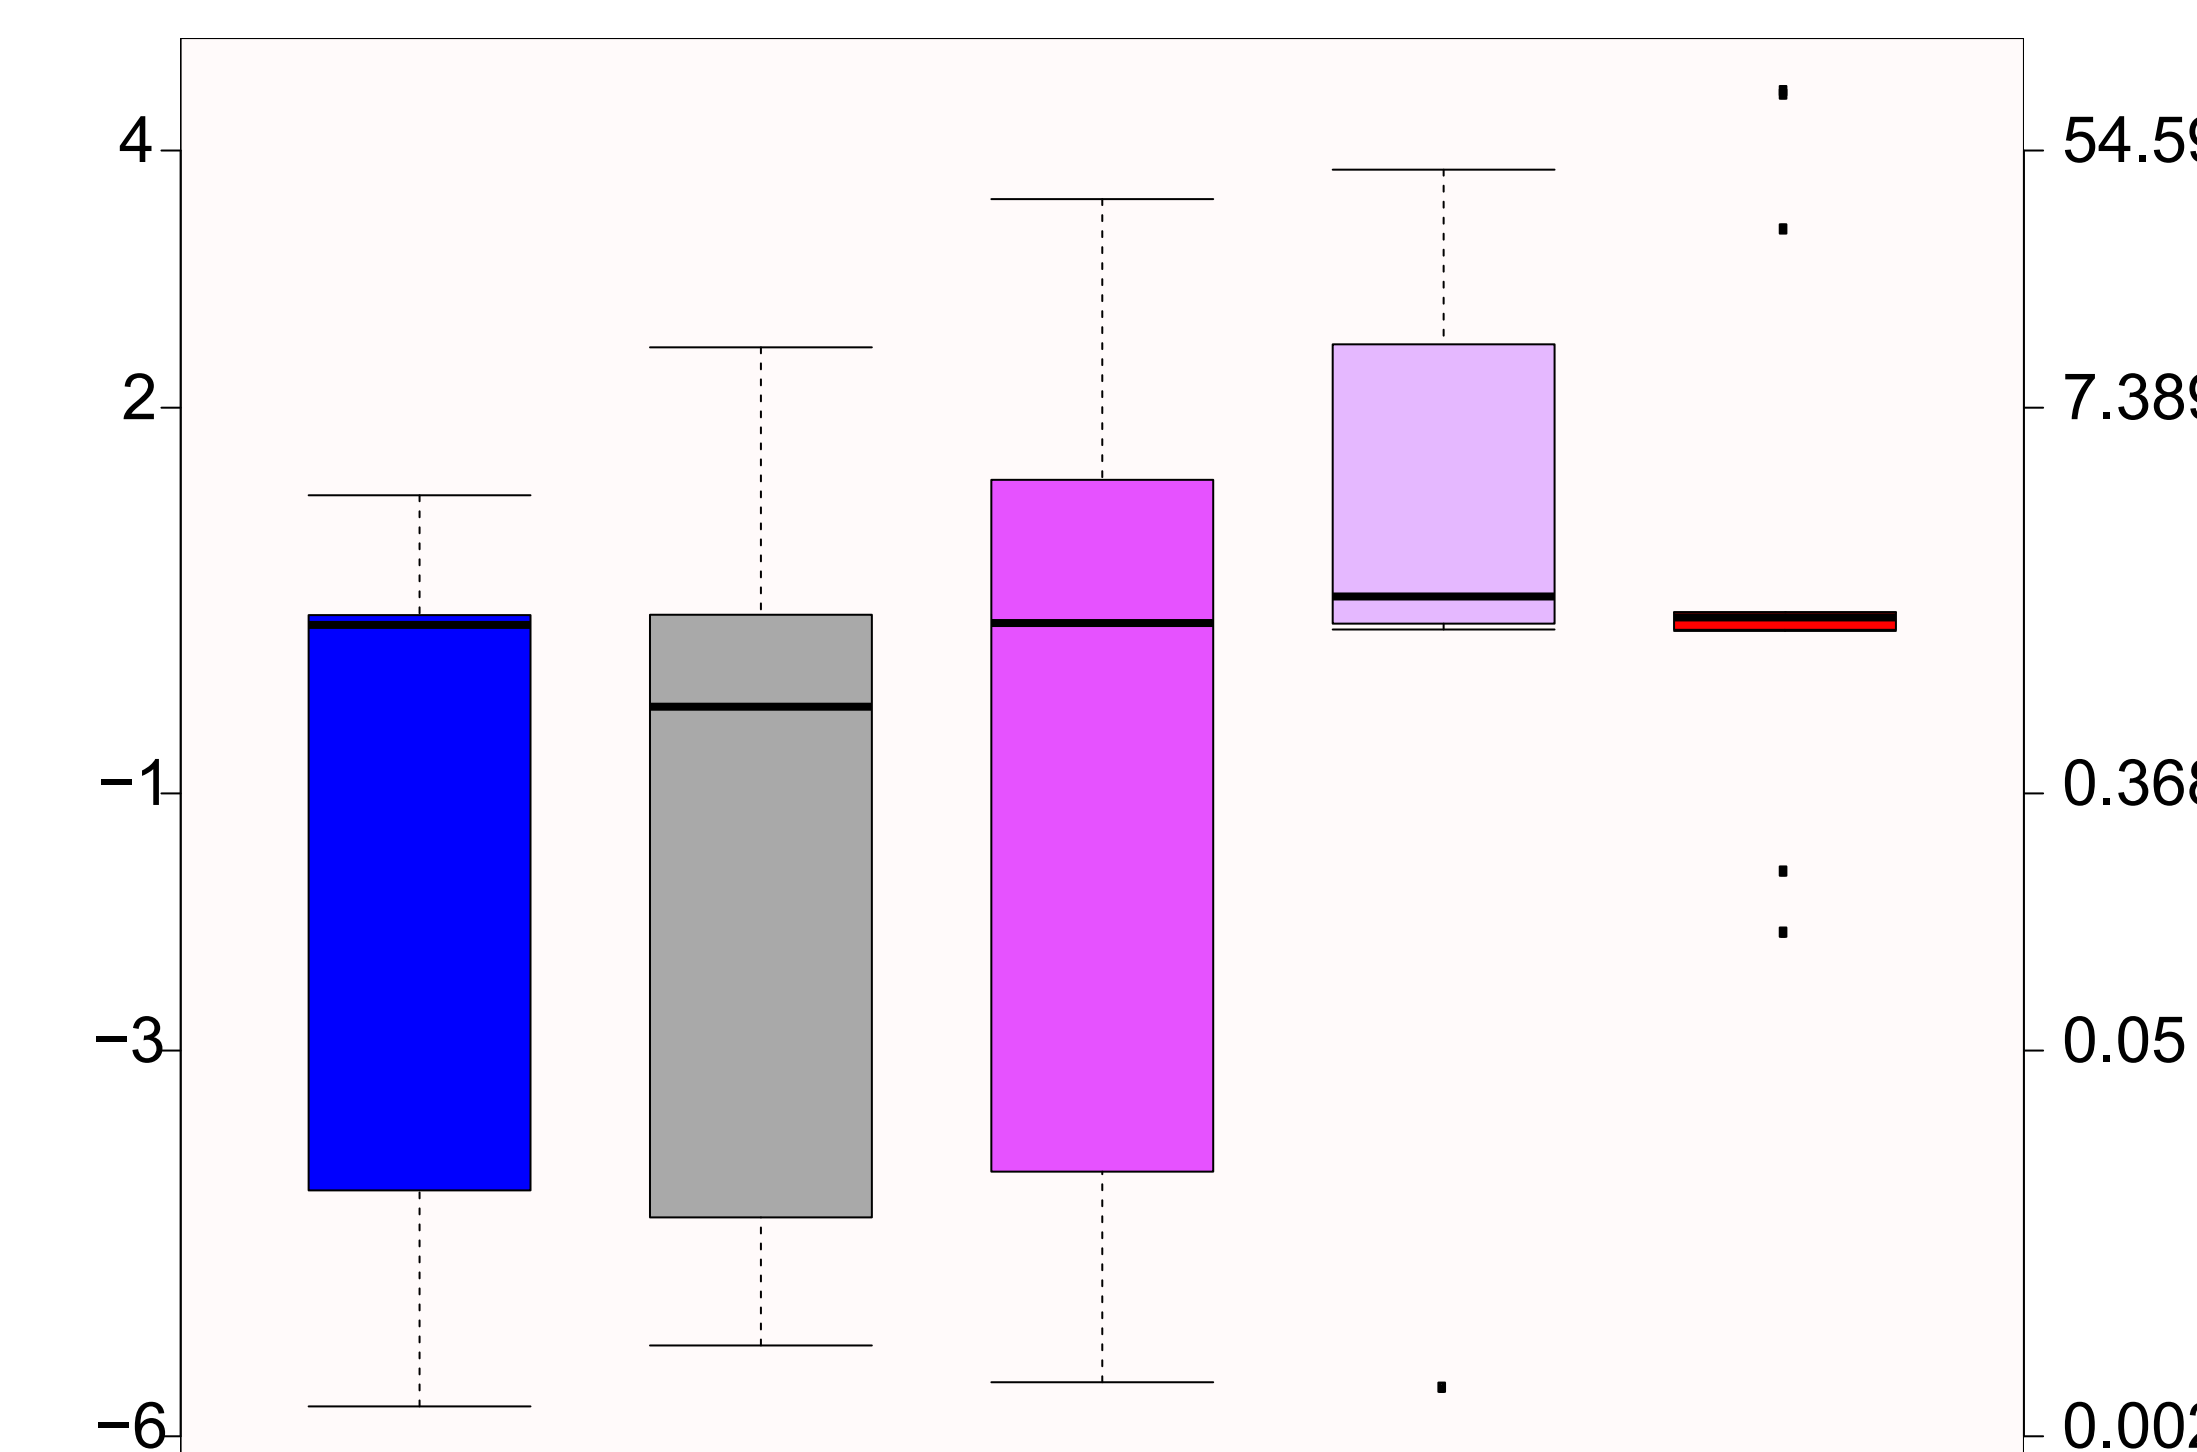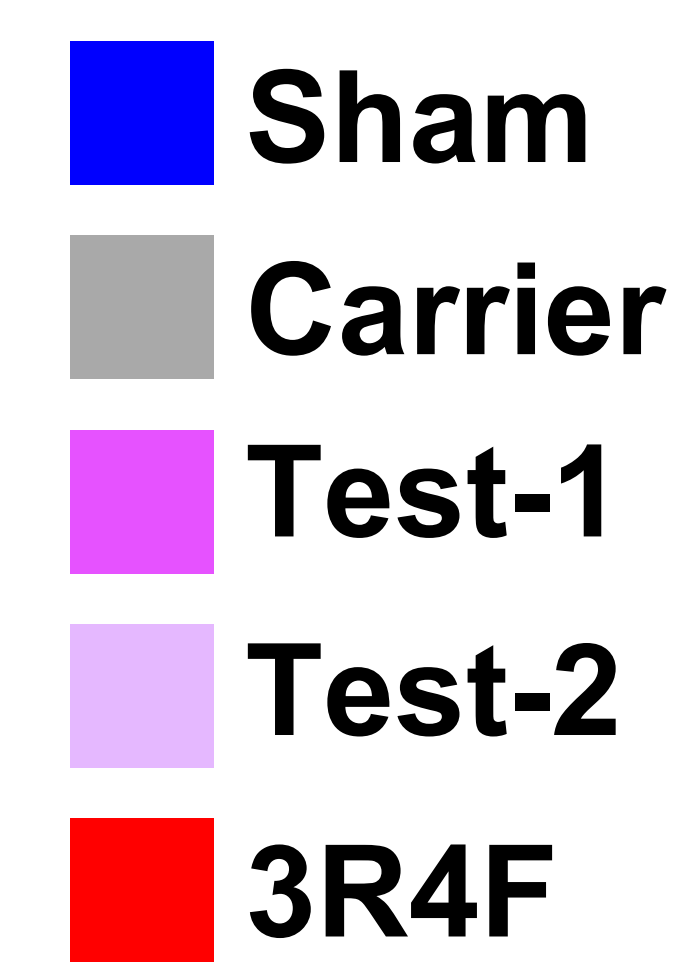

Supplement: Supplementary file 4 [file 1]
