# Supplementary material
Source: publisher figshare collection journal article supplement (https://tandf.figshare.com/articles/dataset/_/9938042)

A

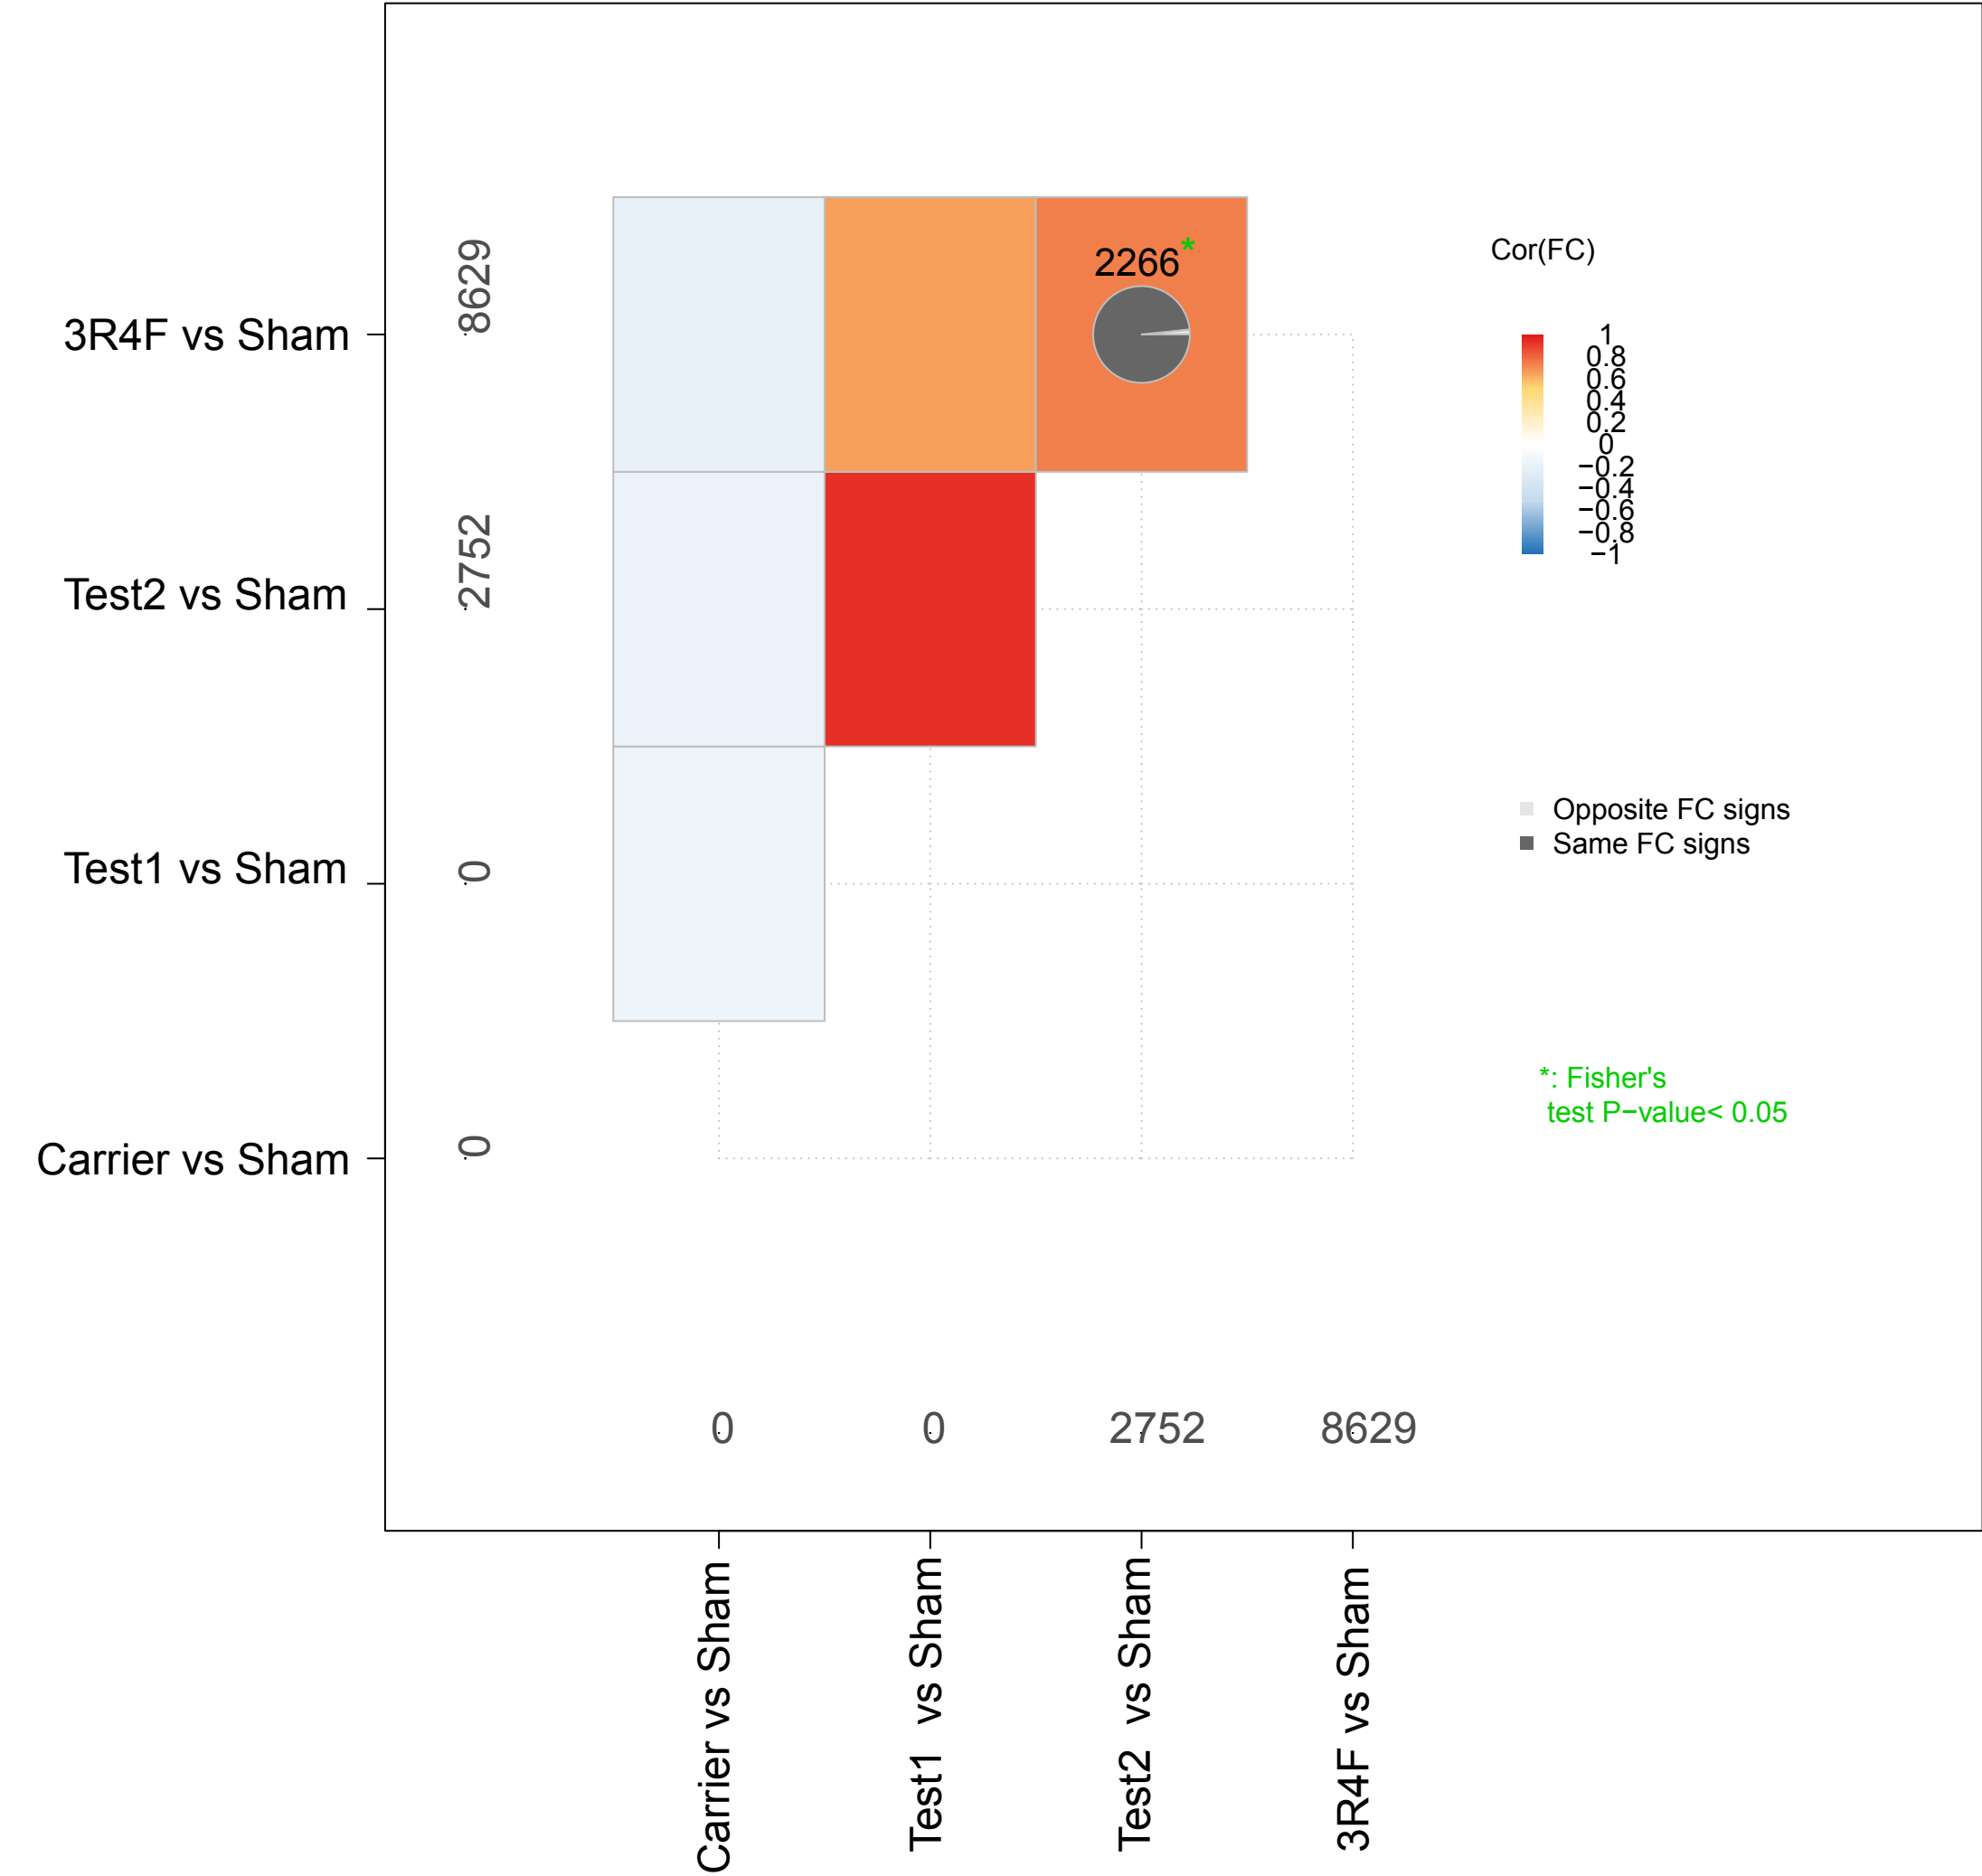

B

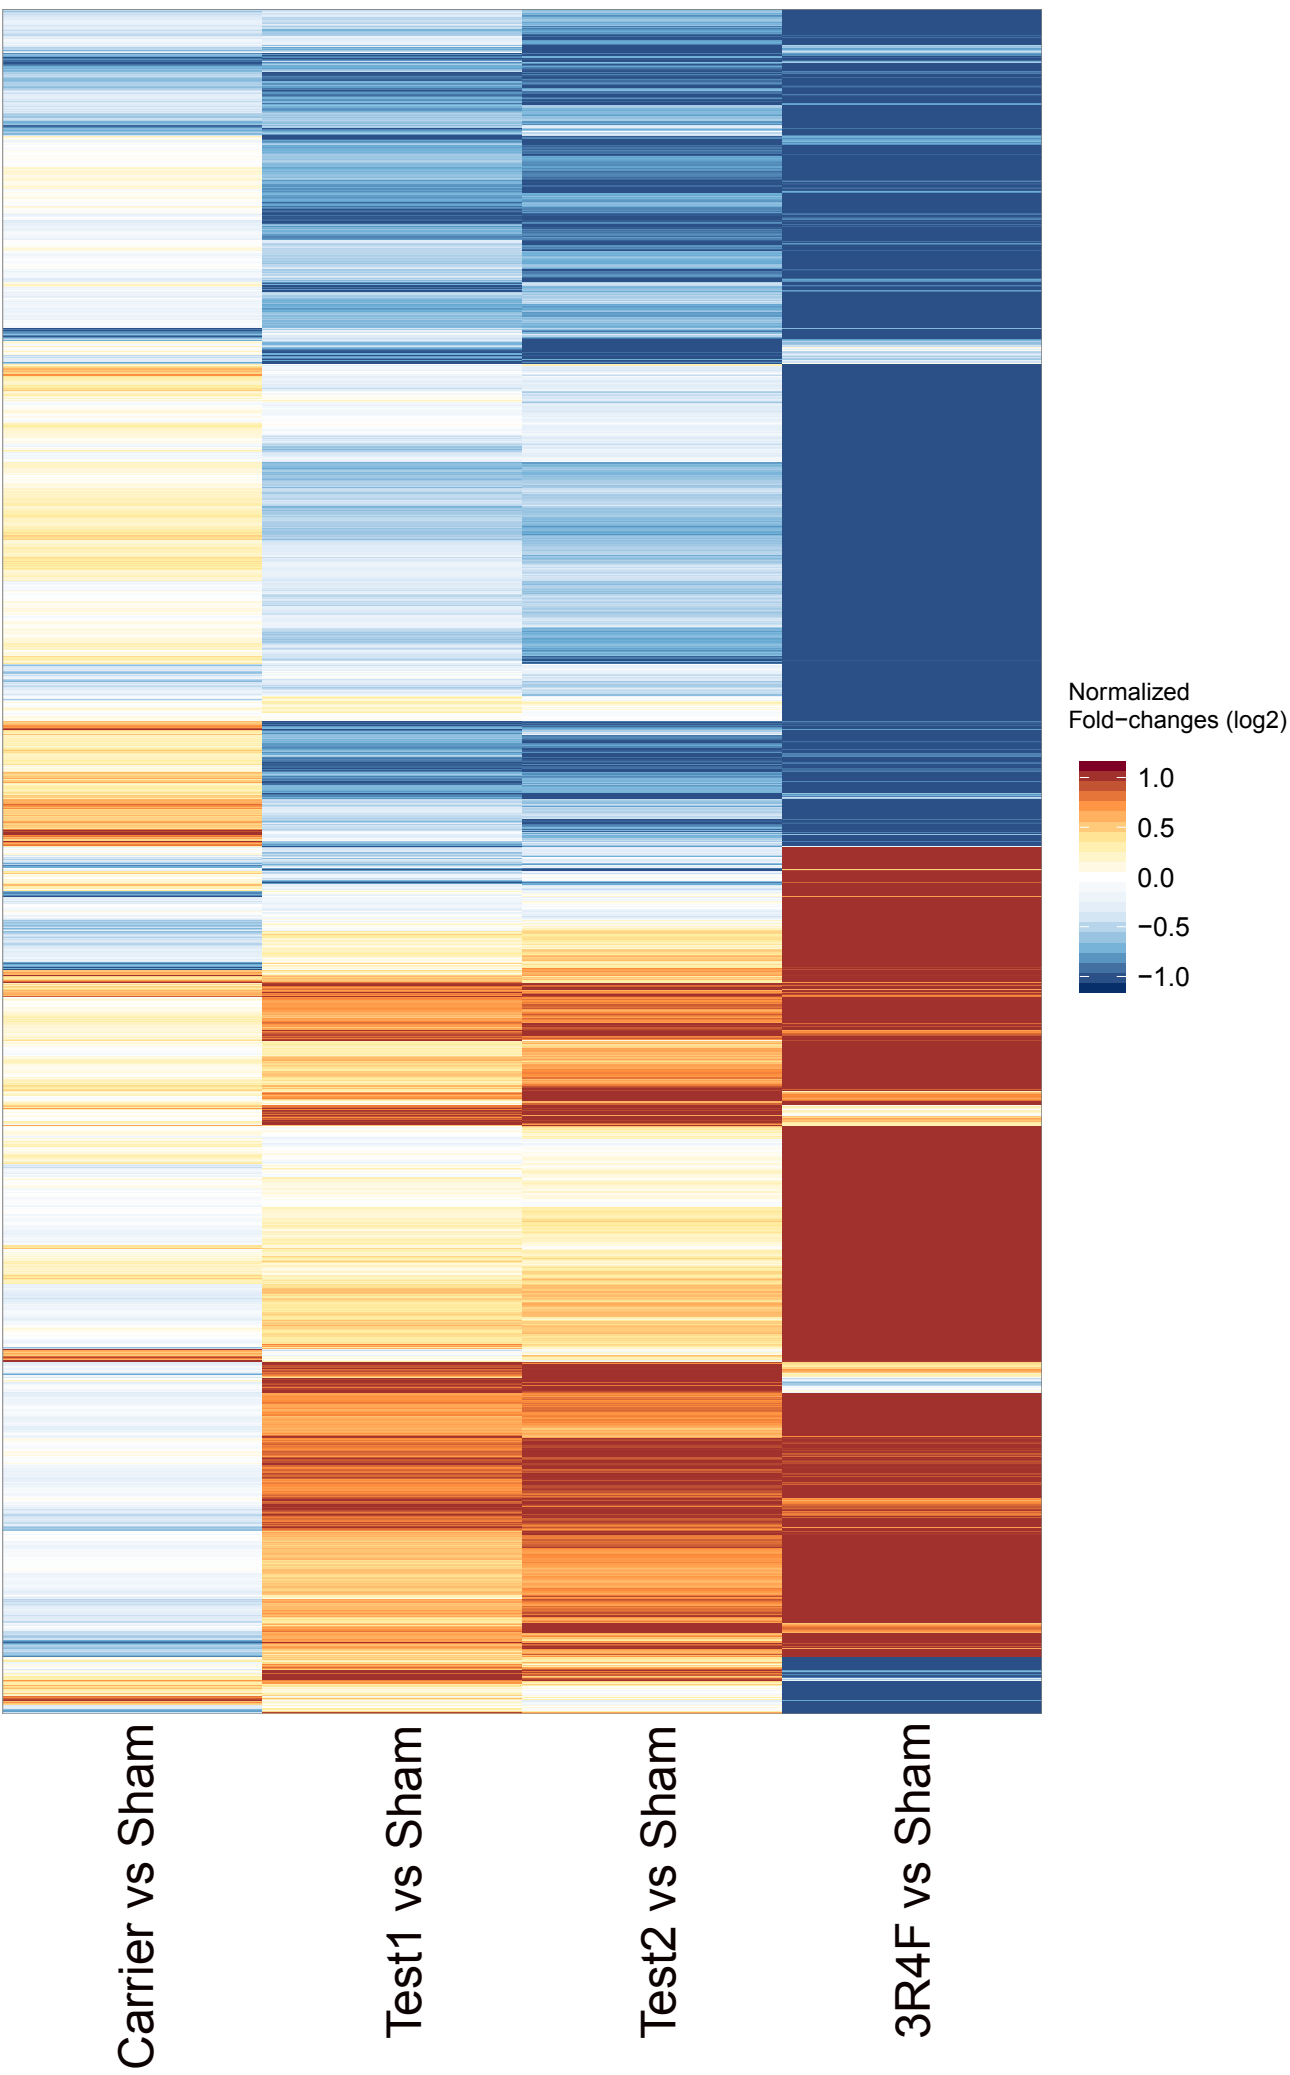

Supplement: Supplementary file 1 [file 1]

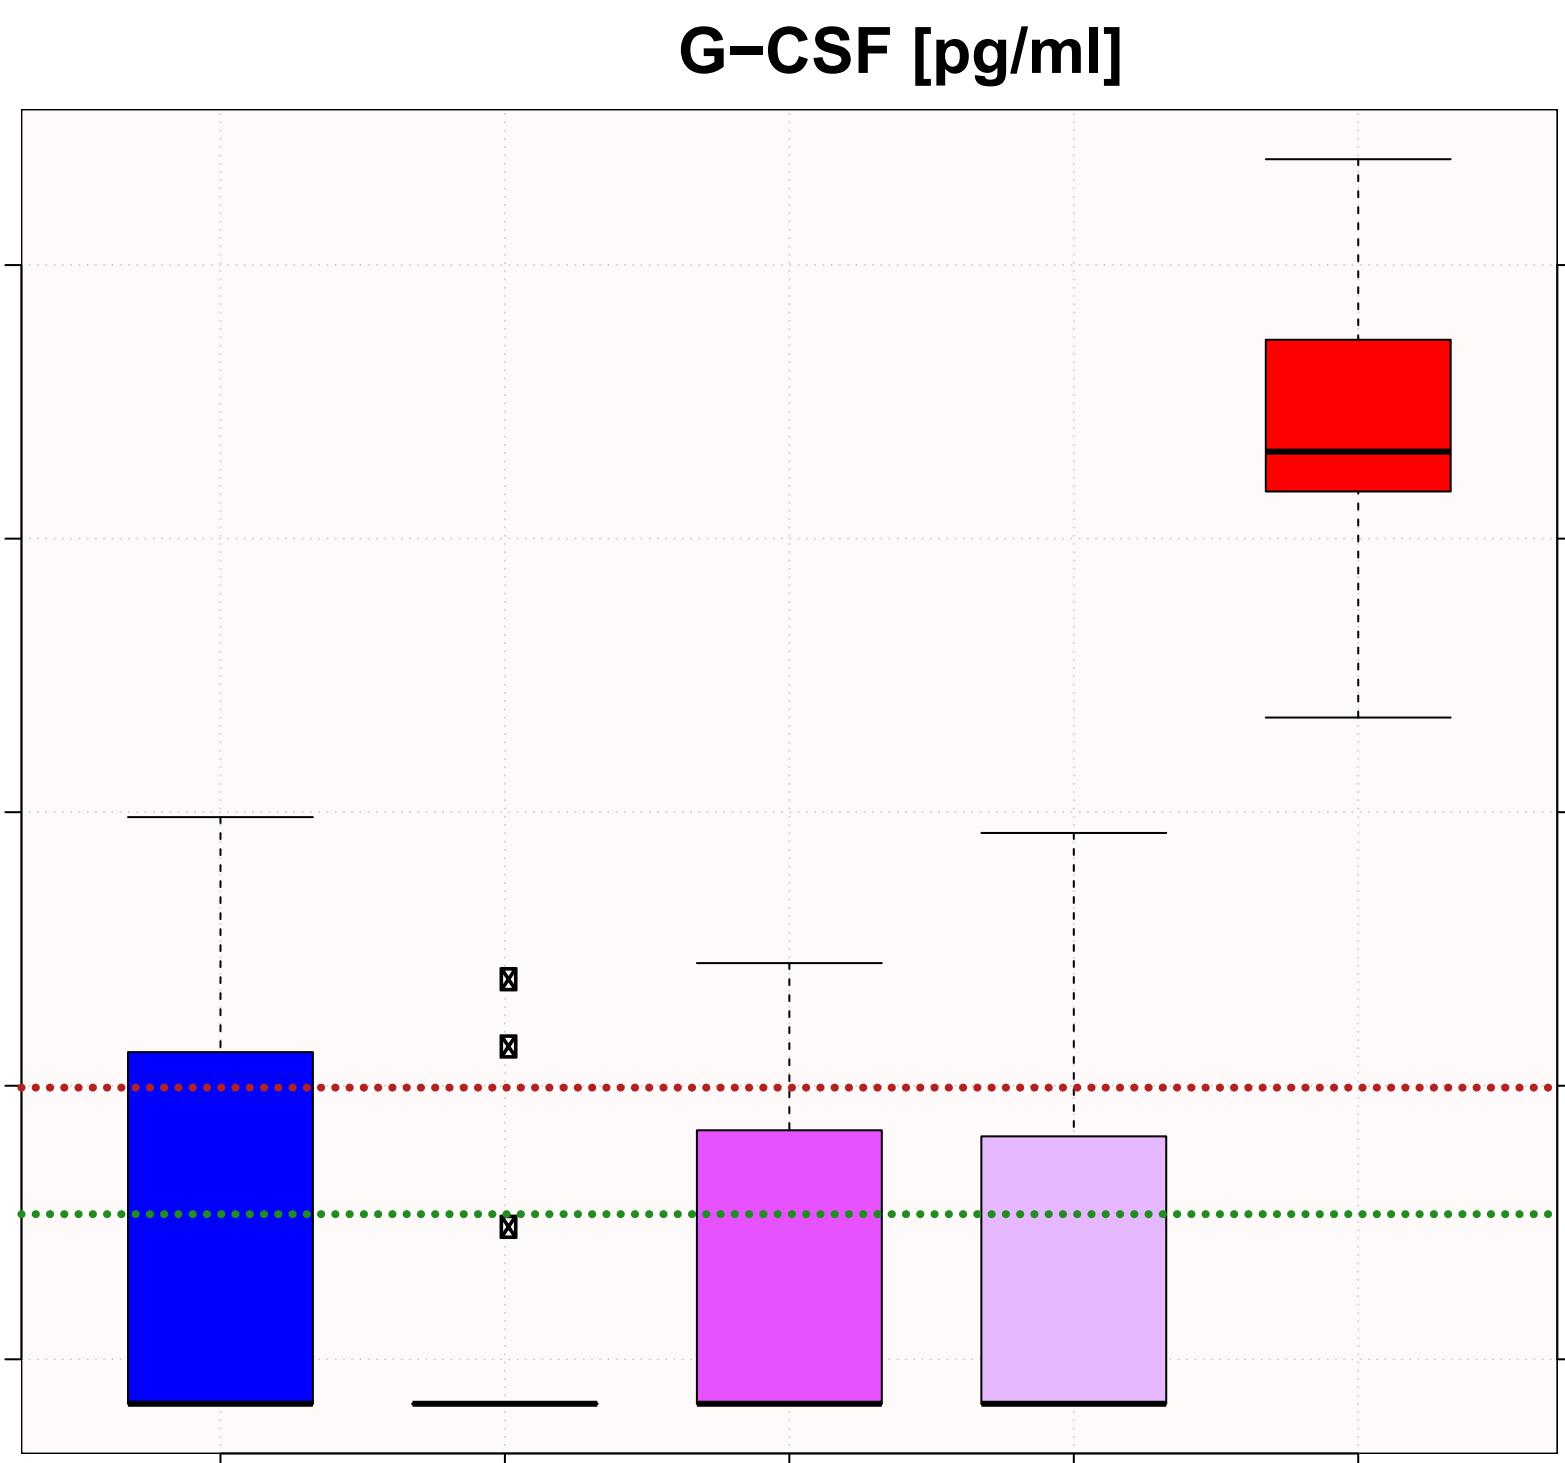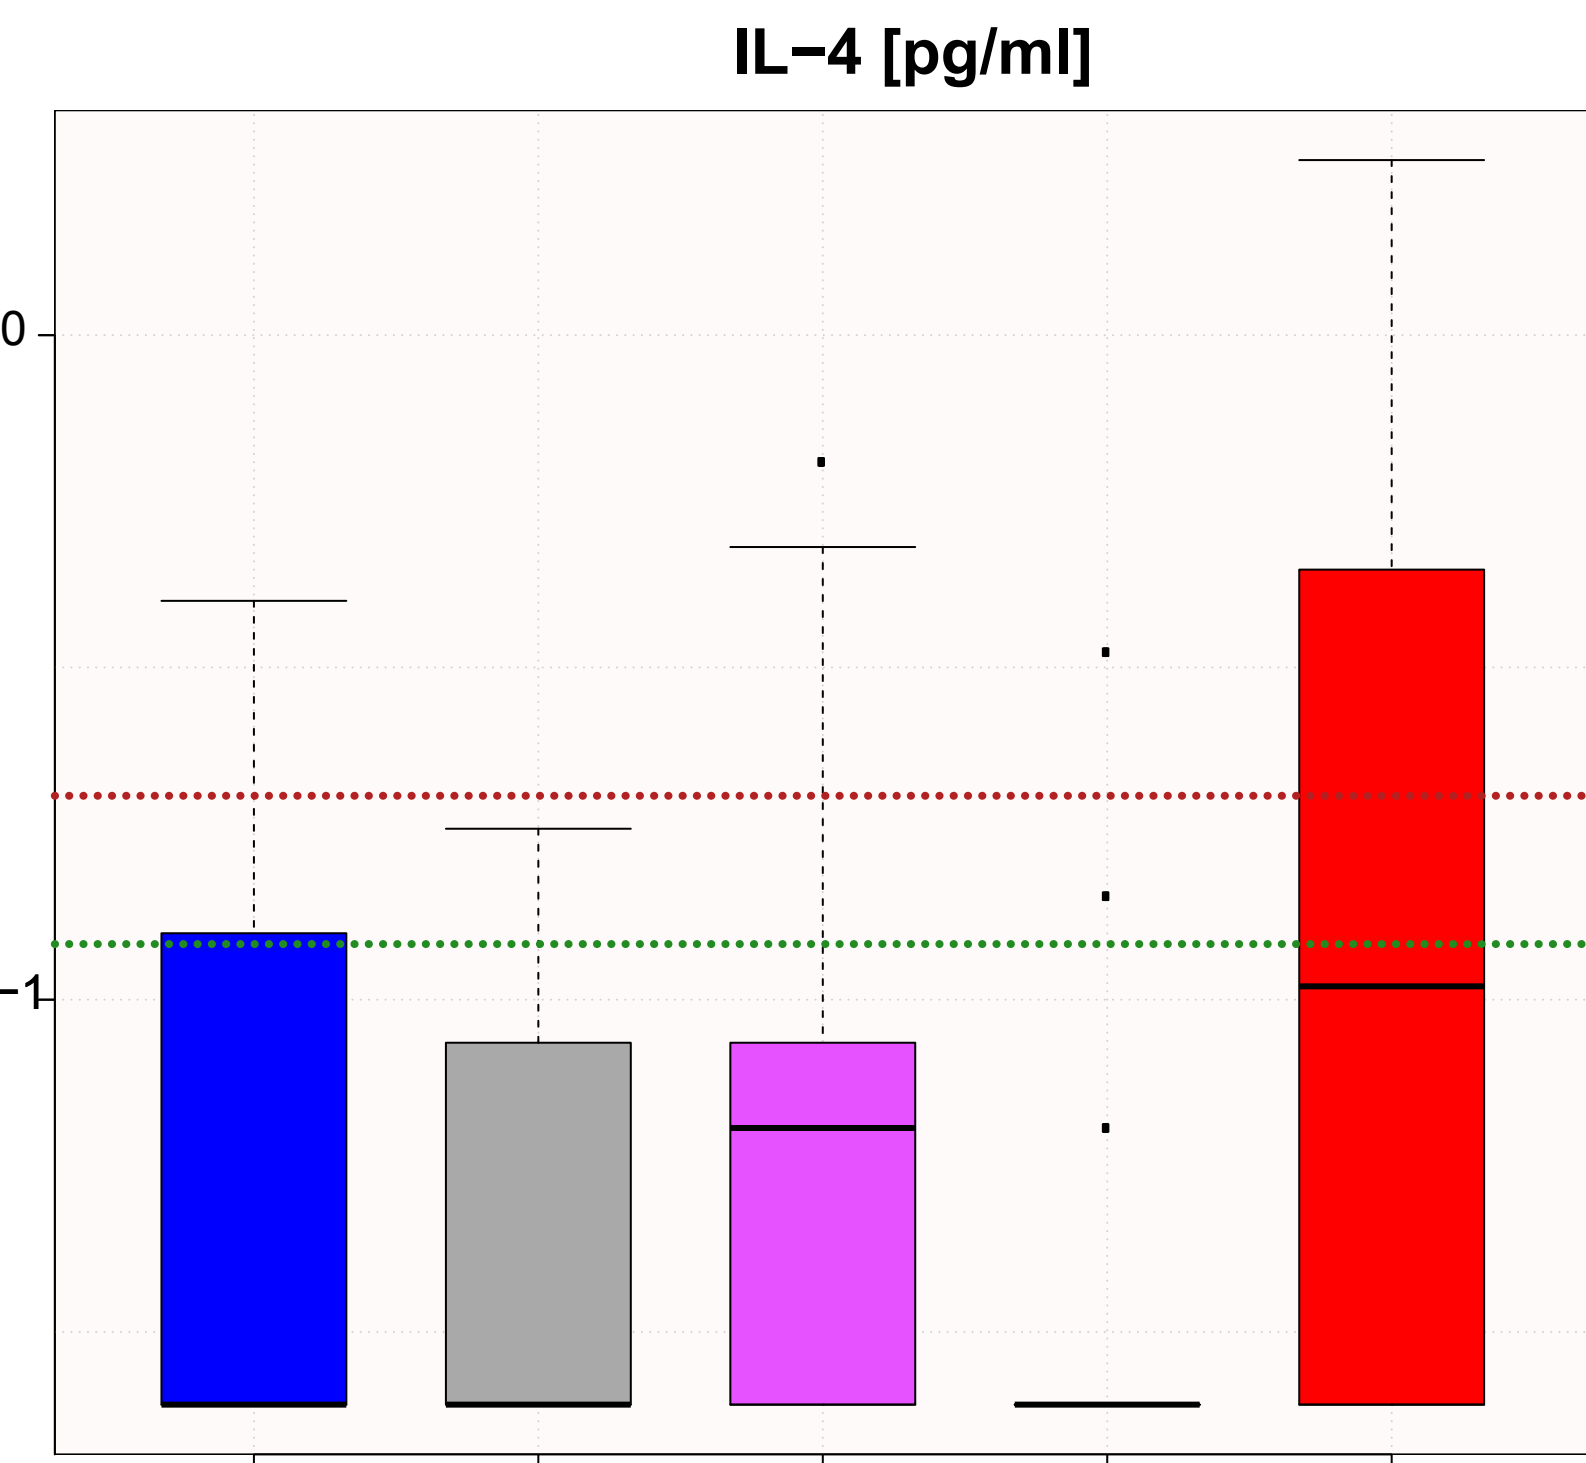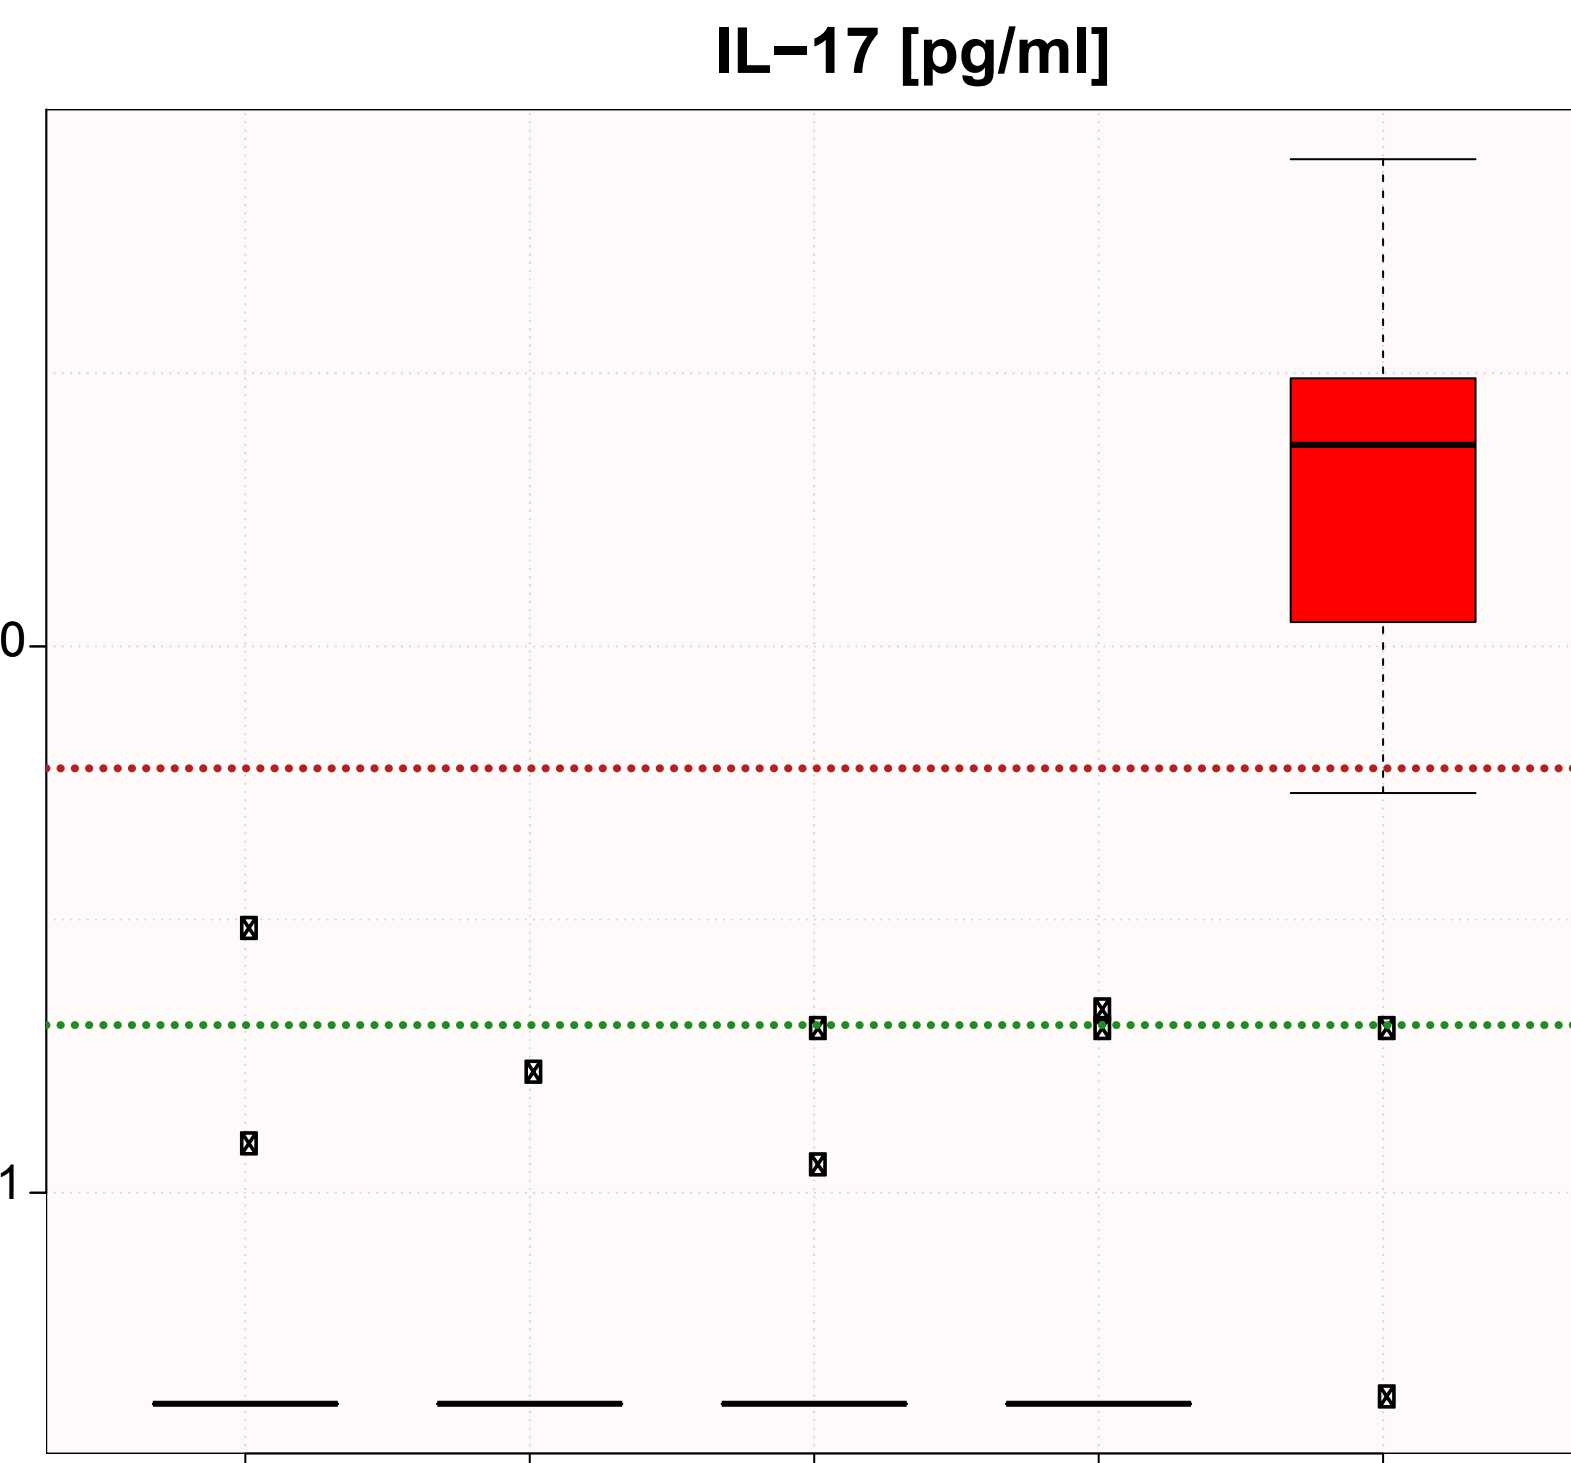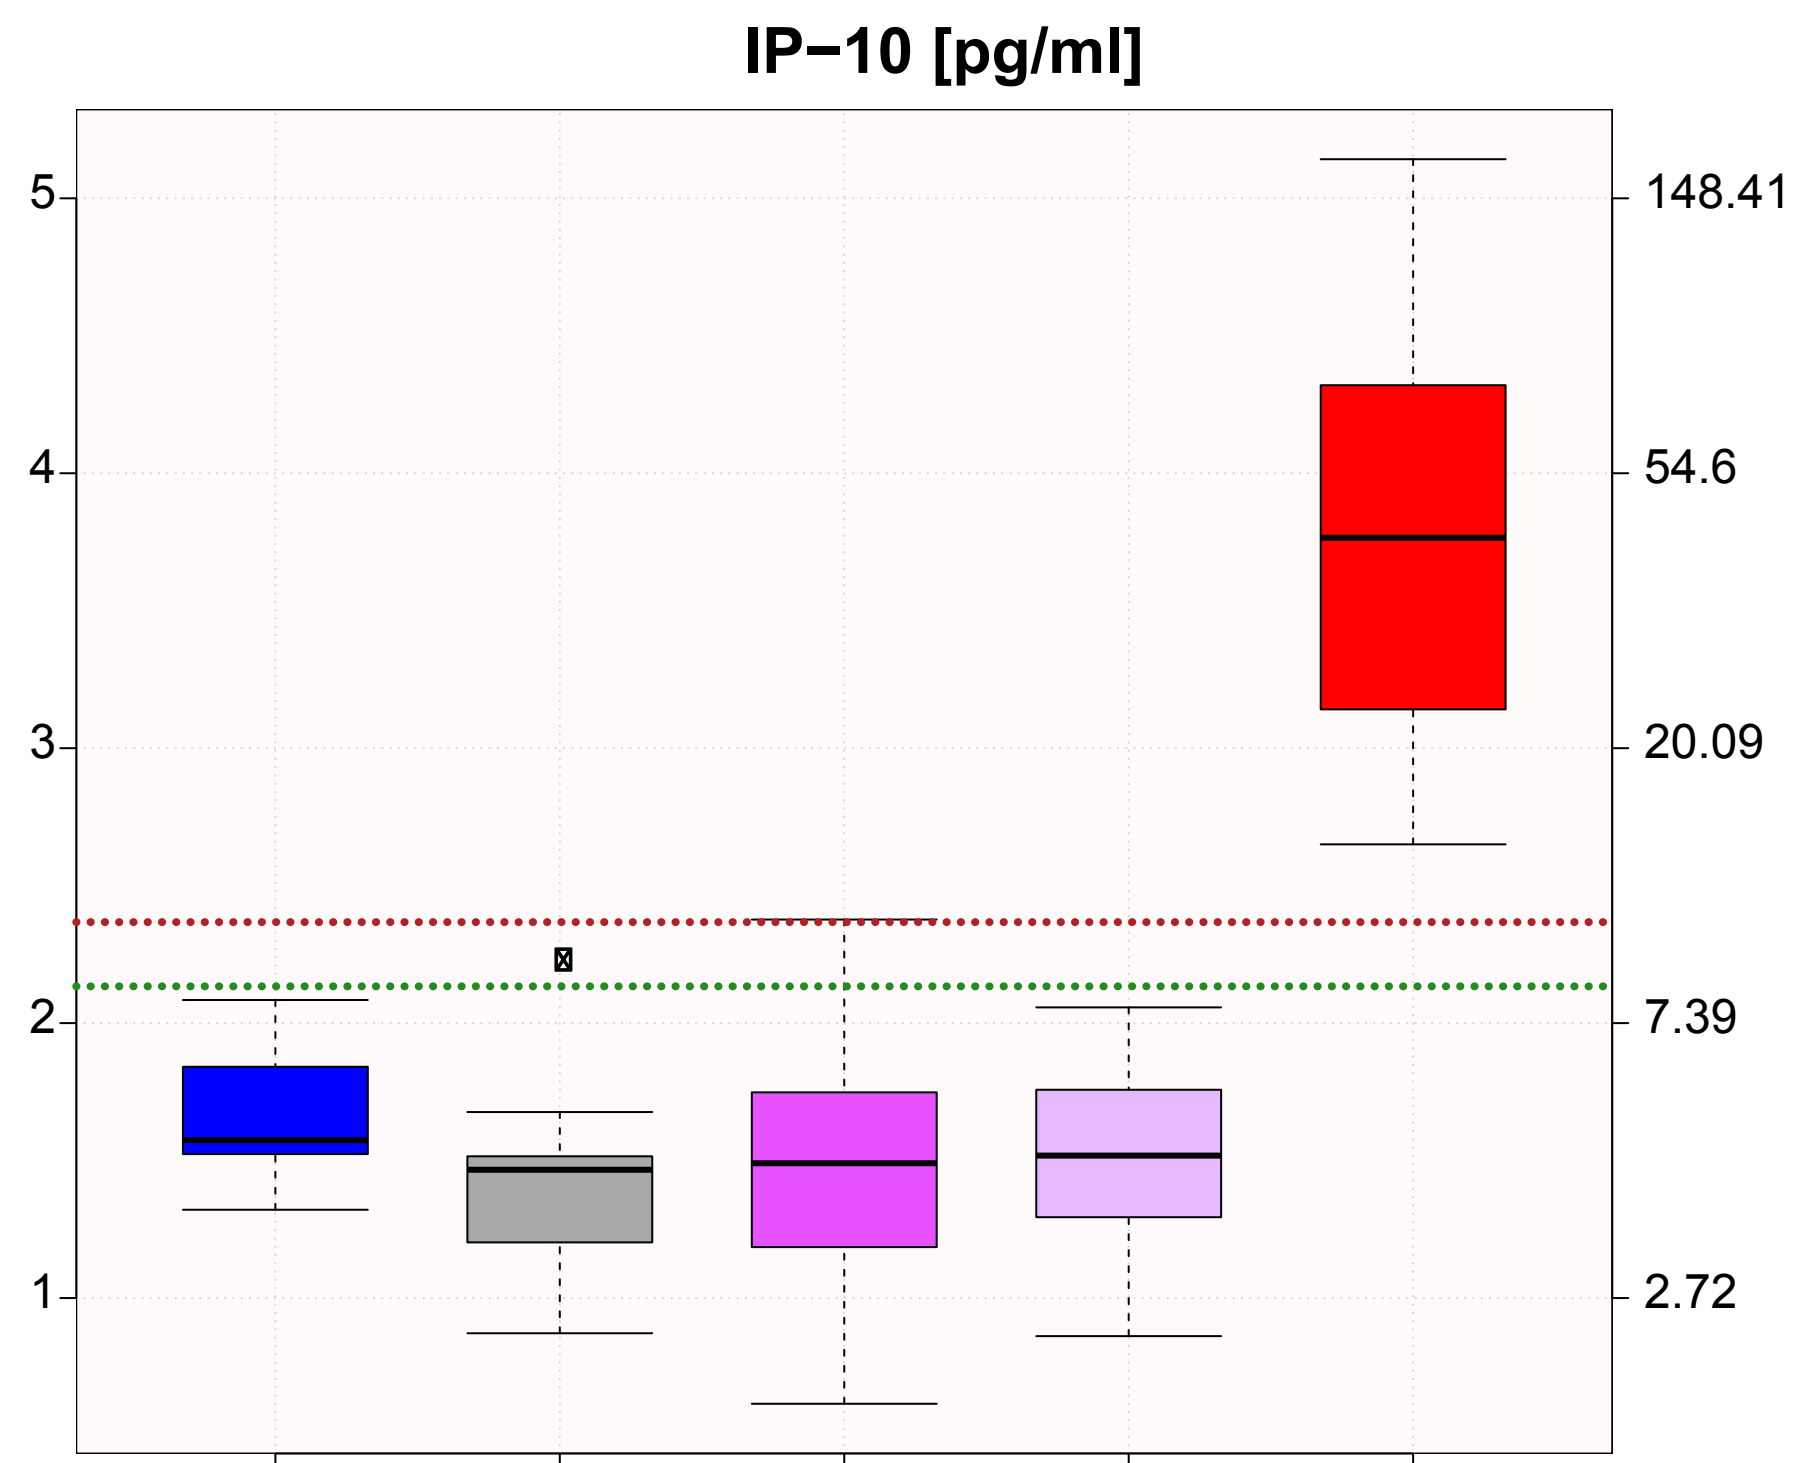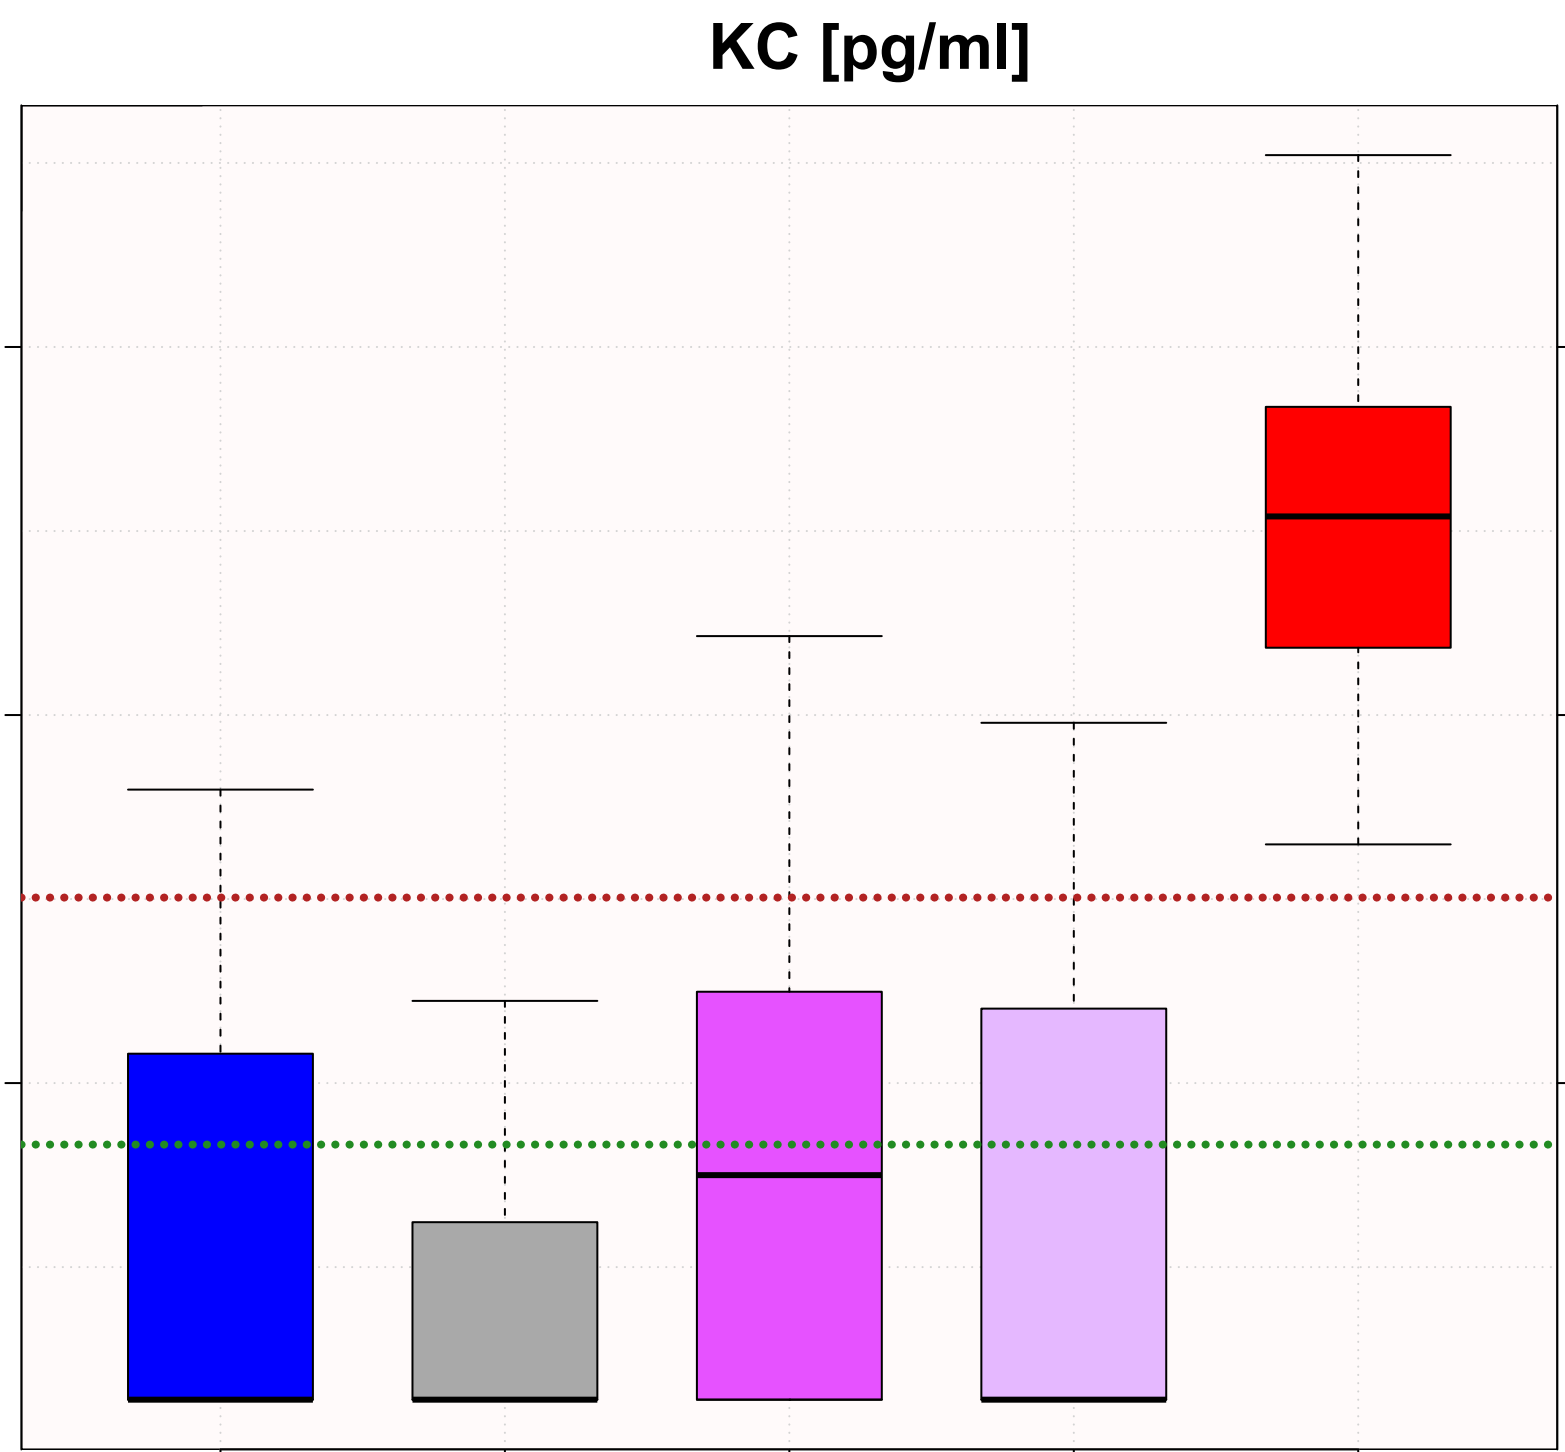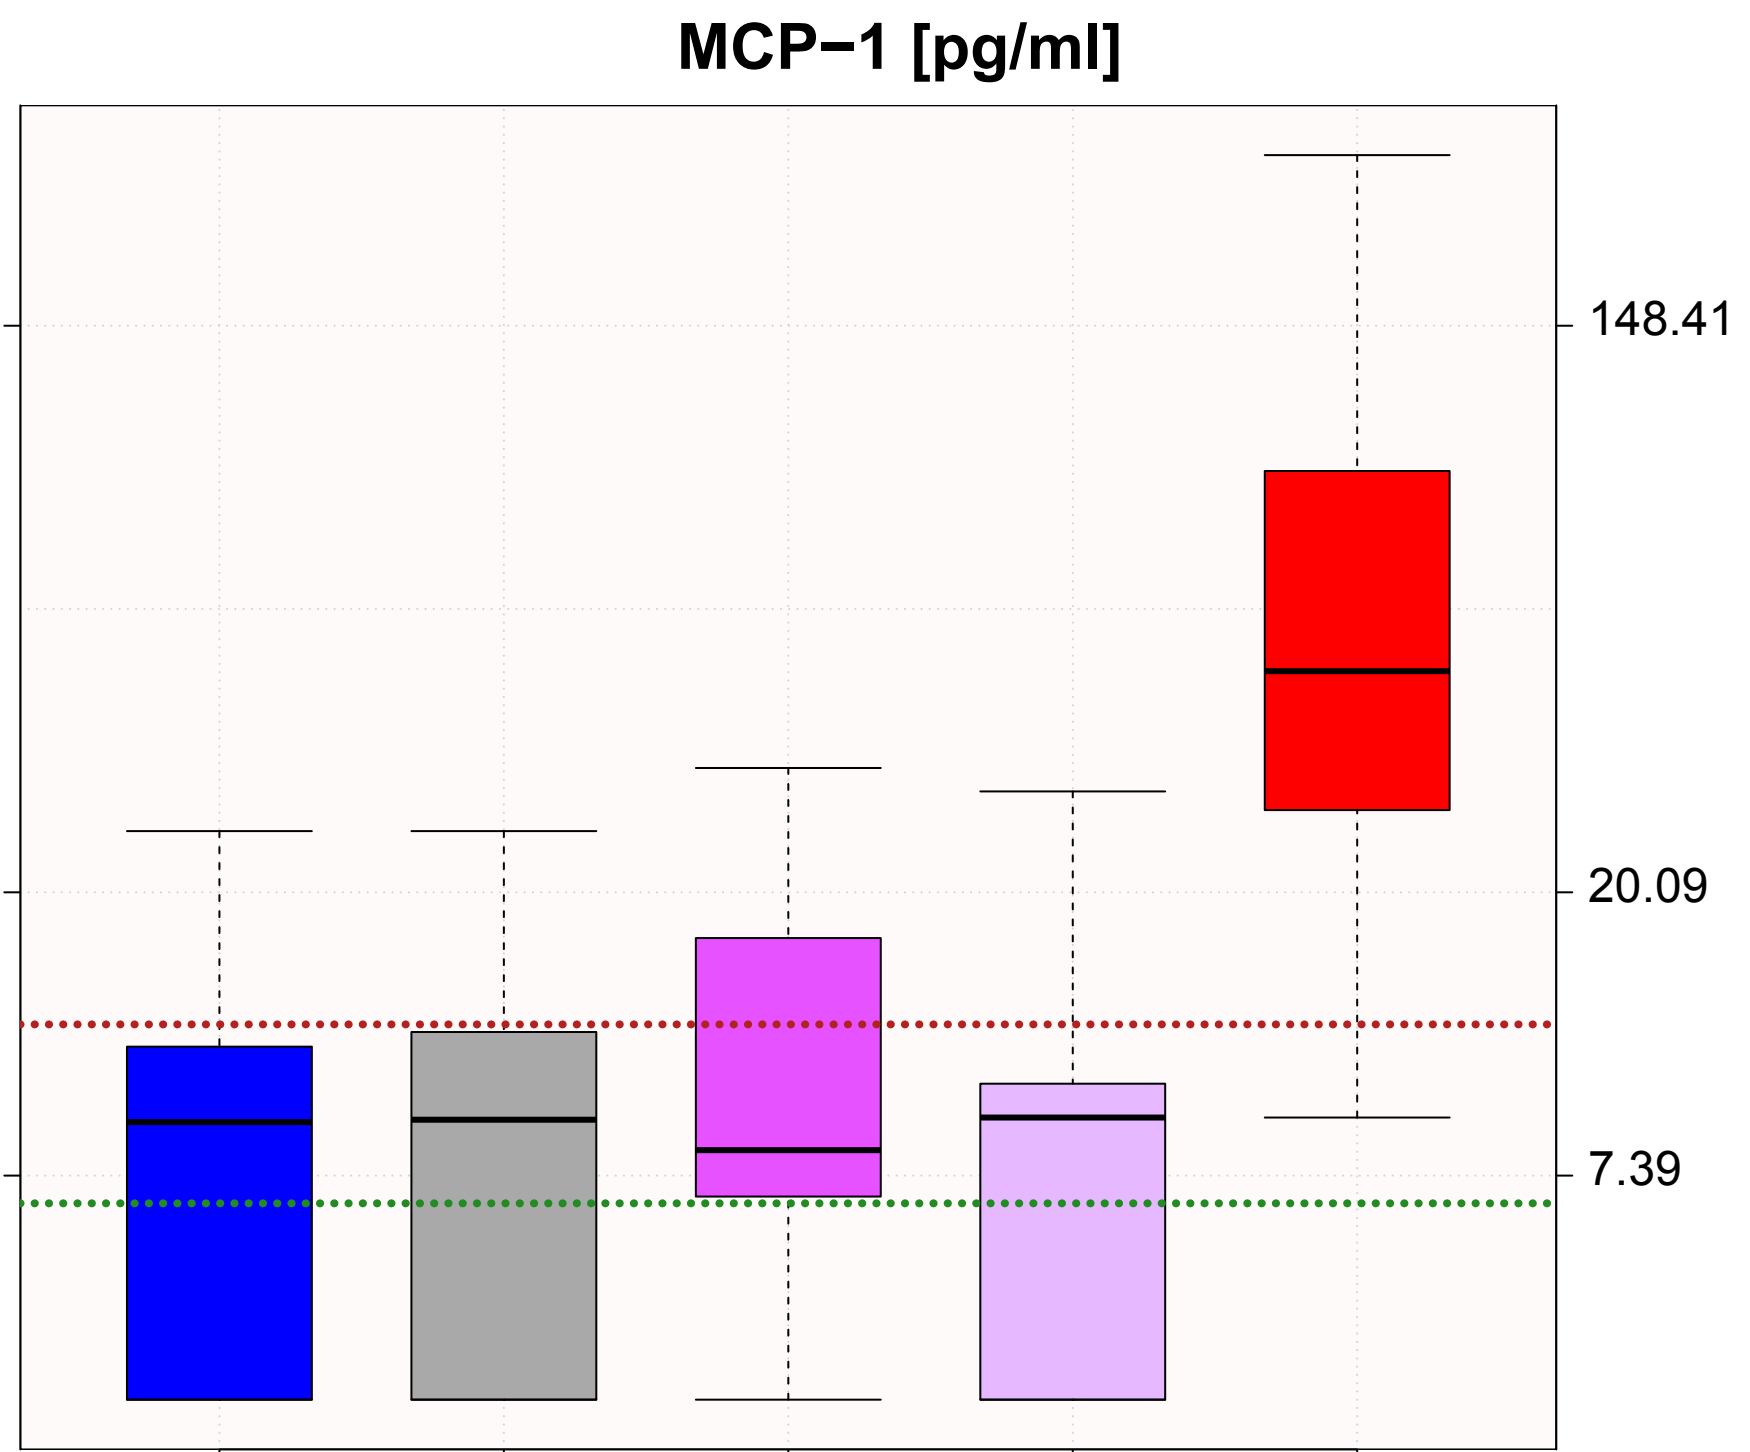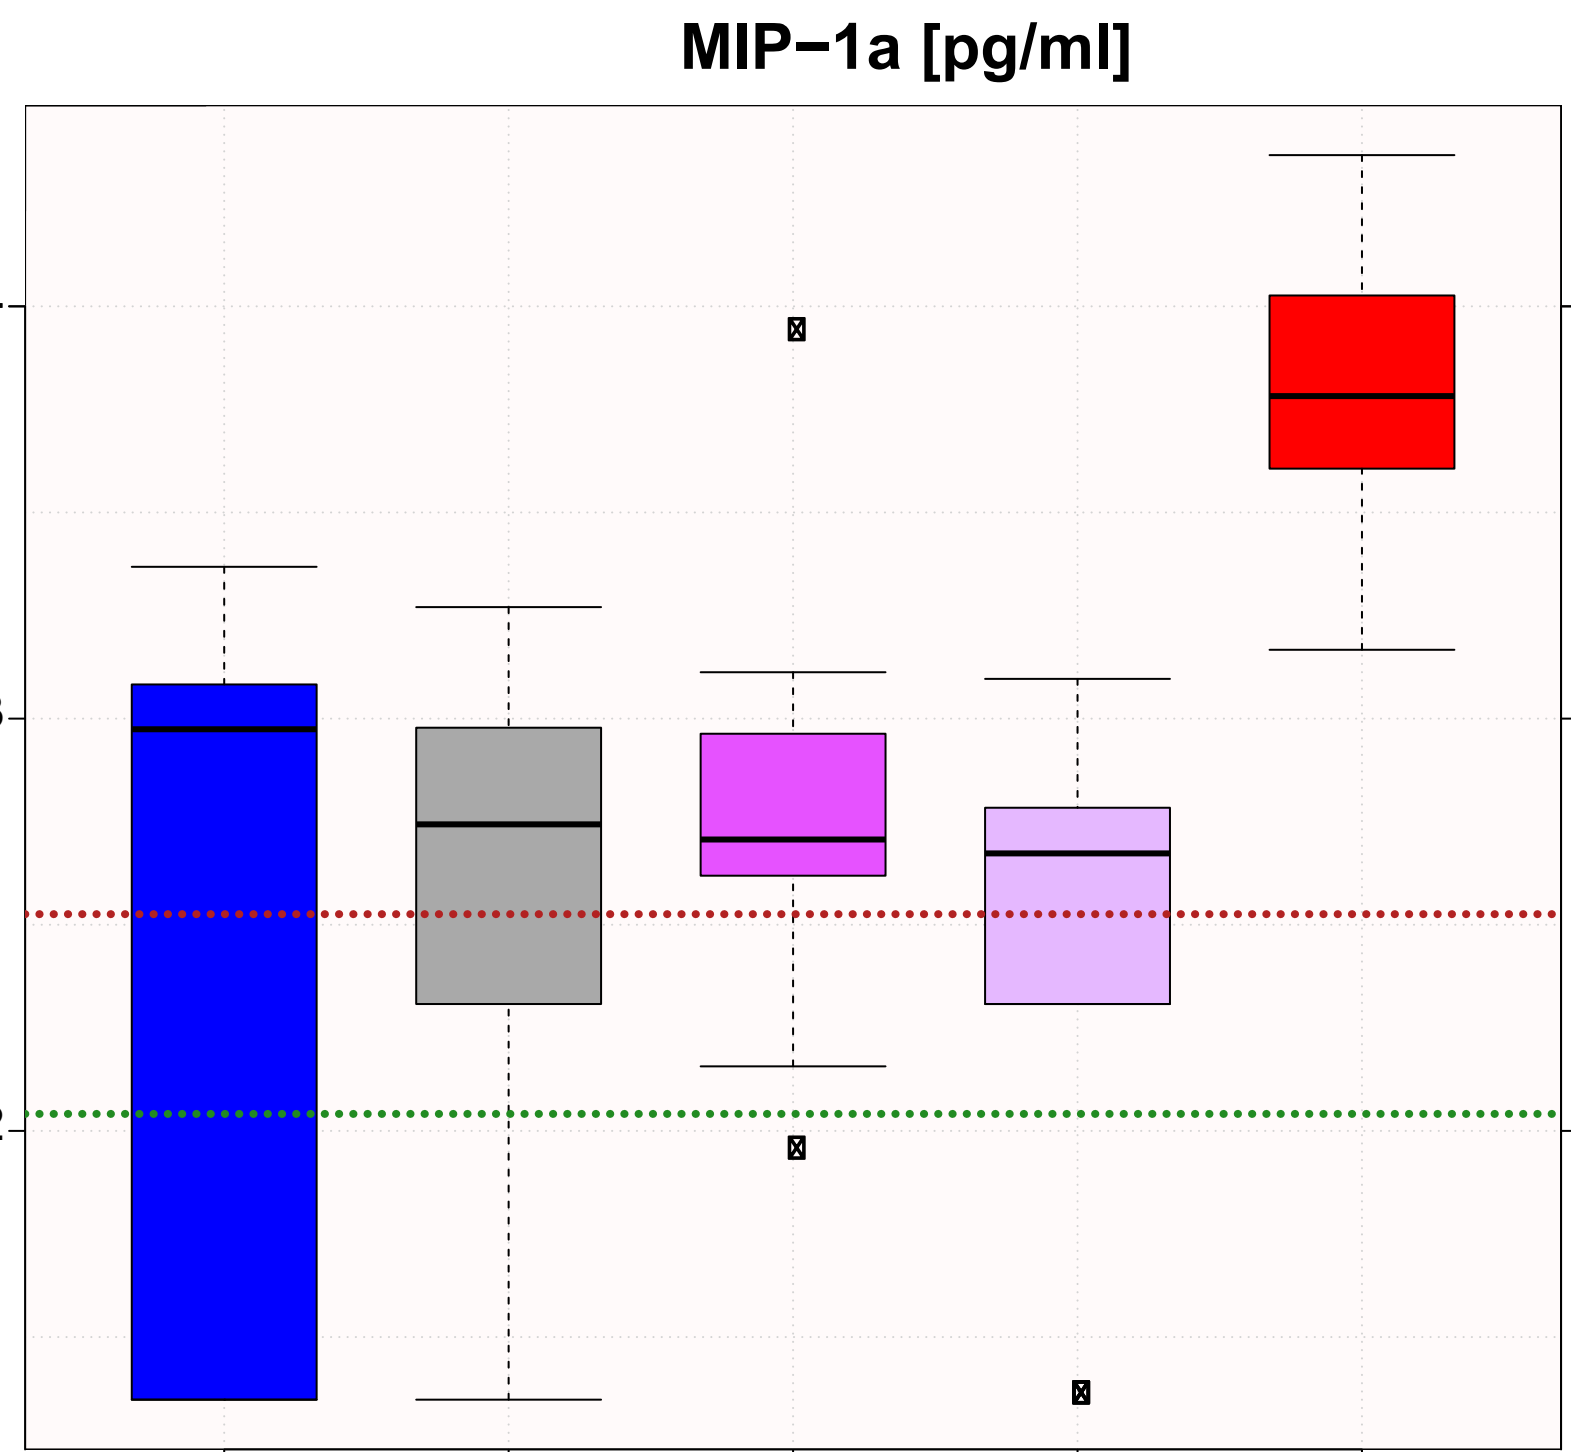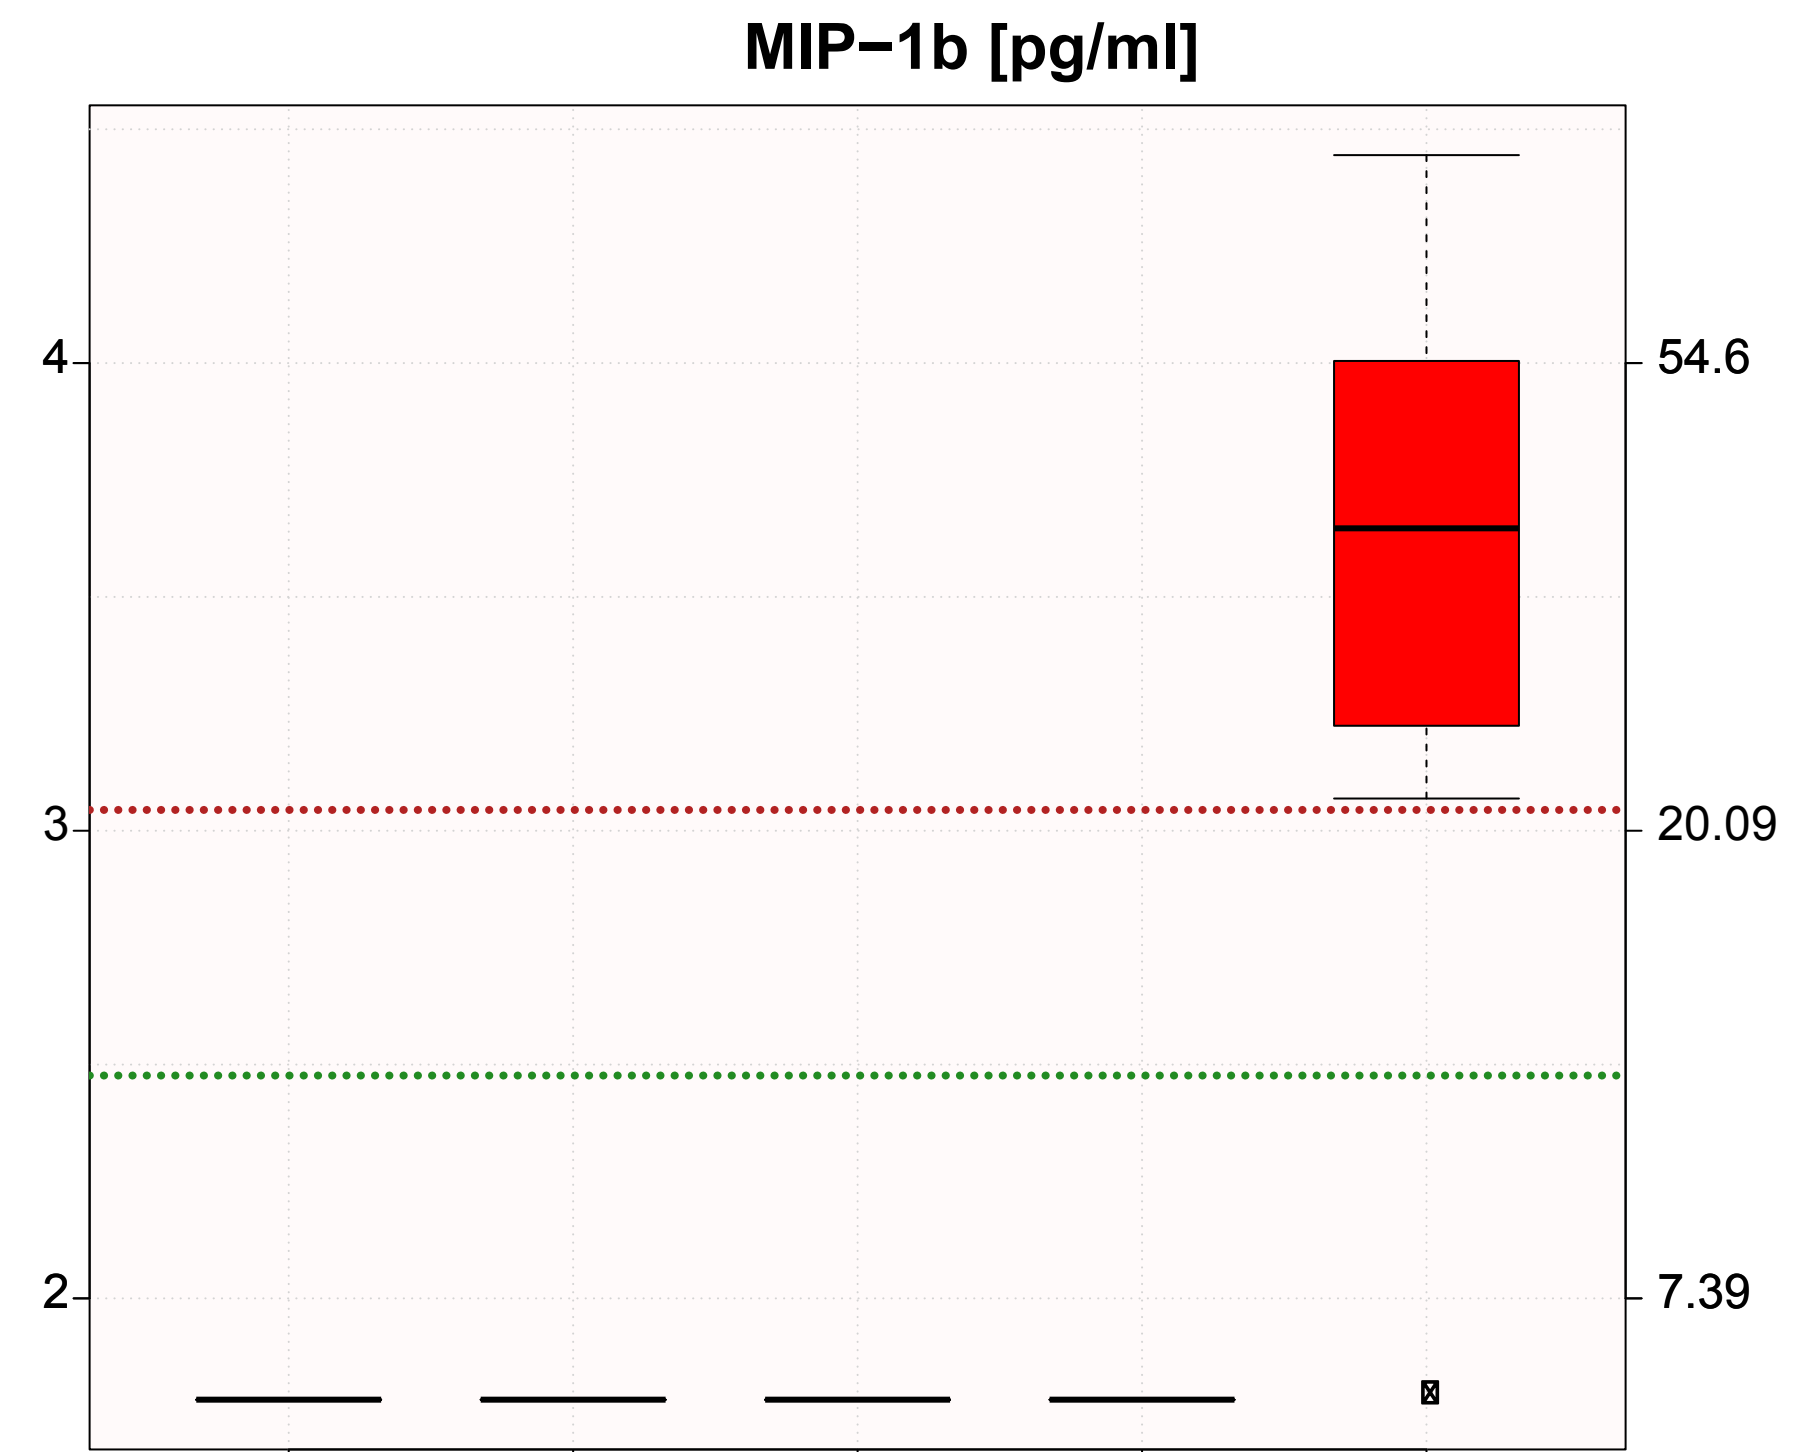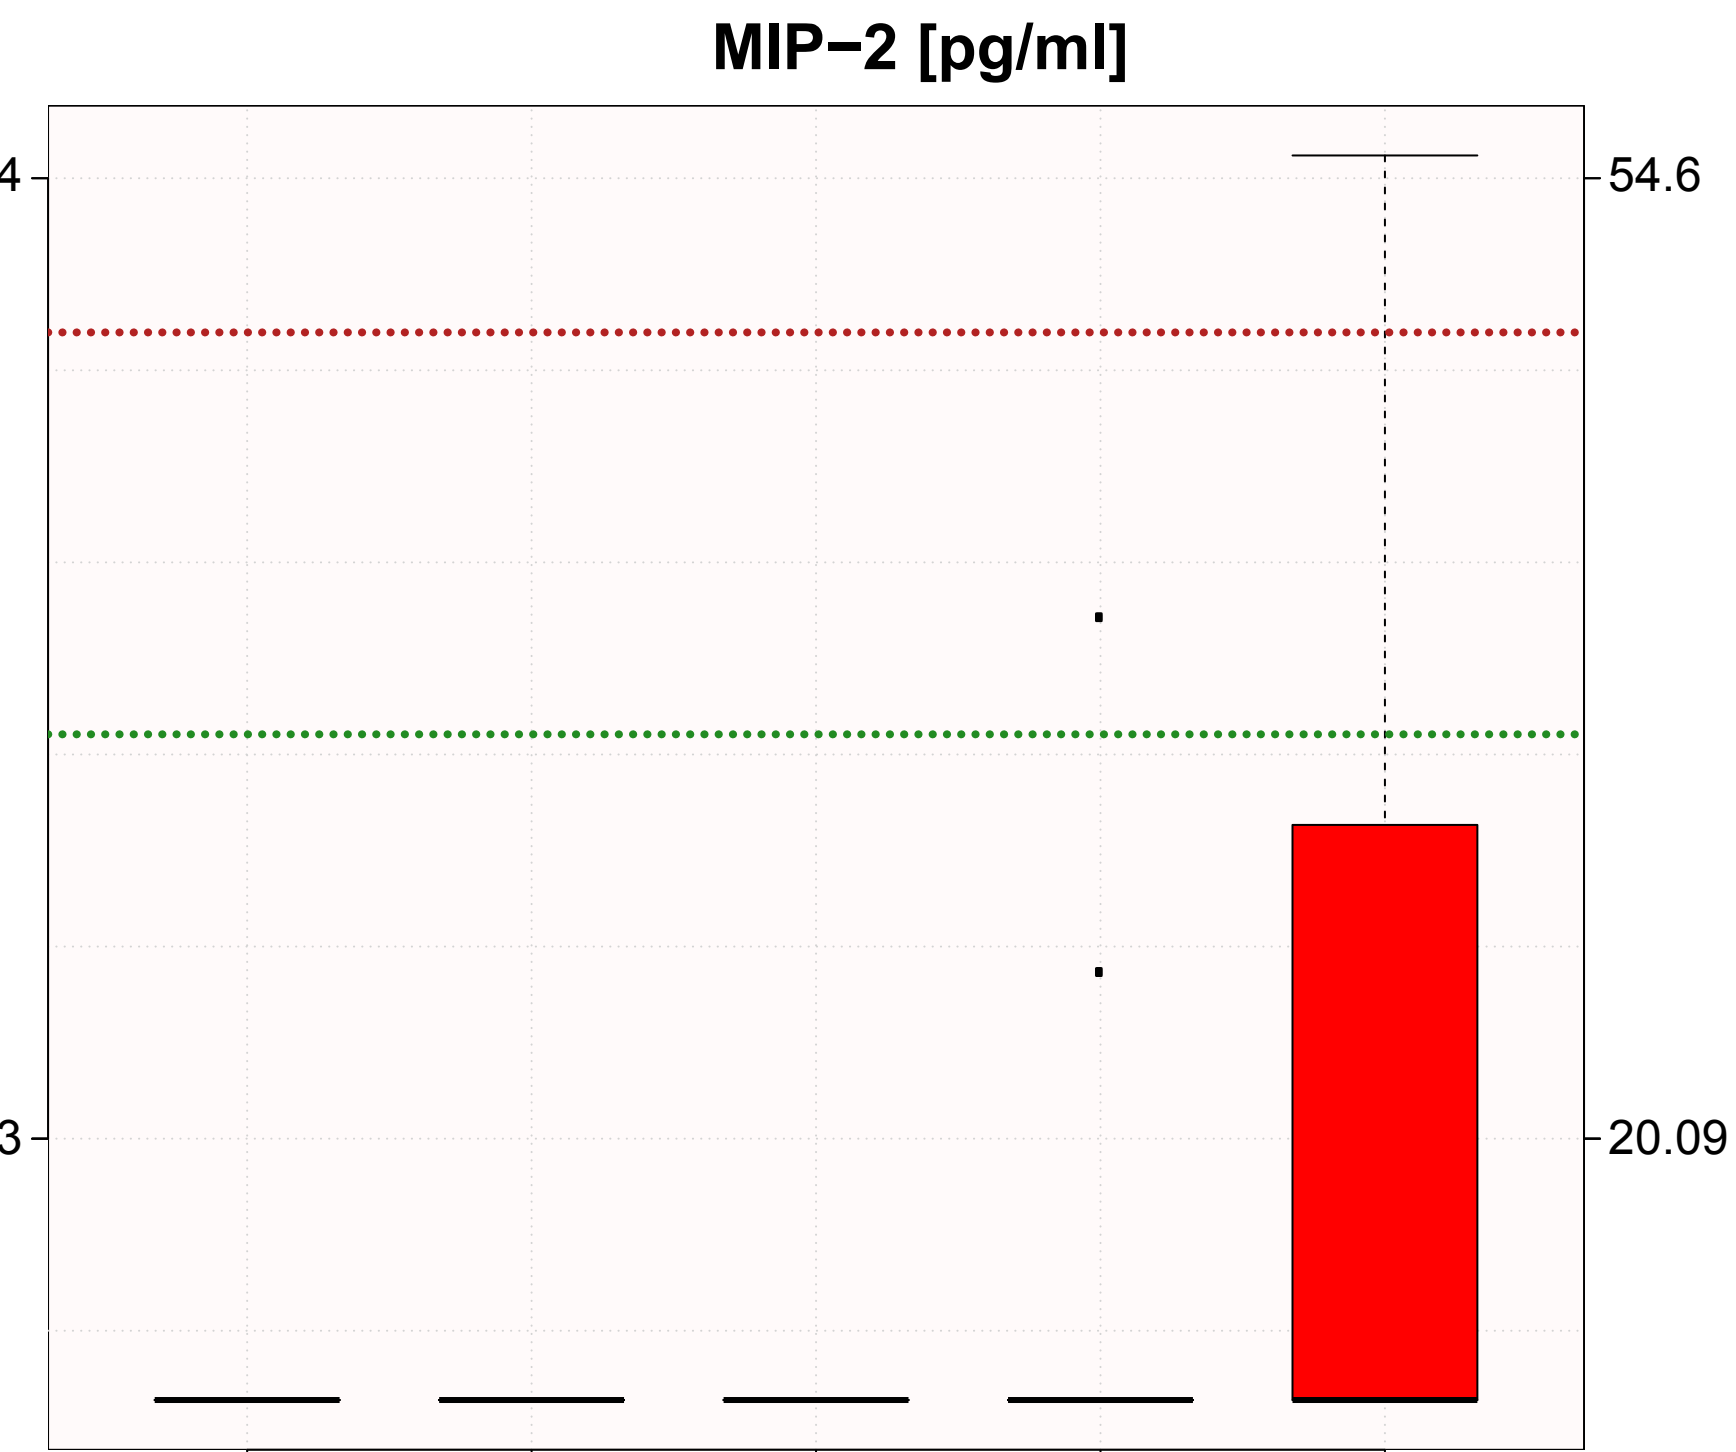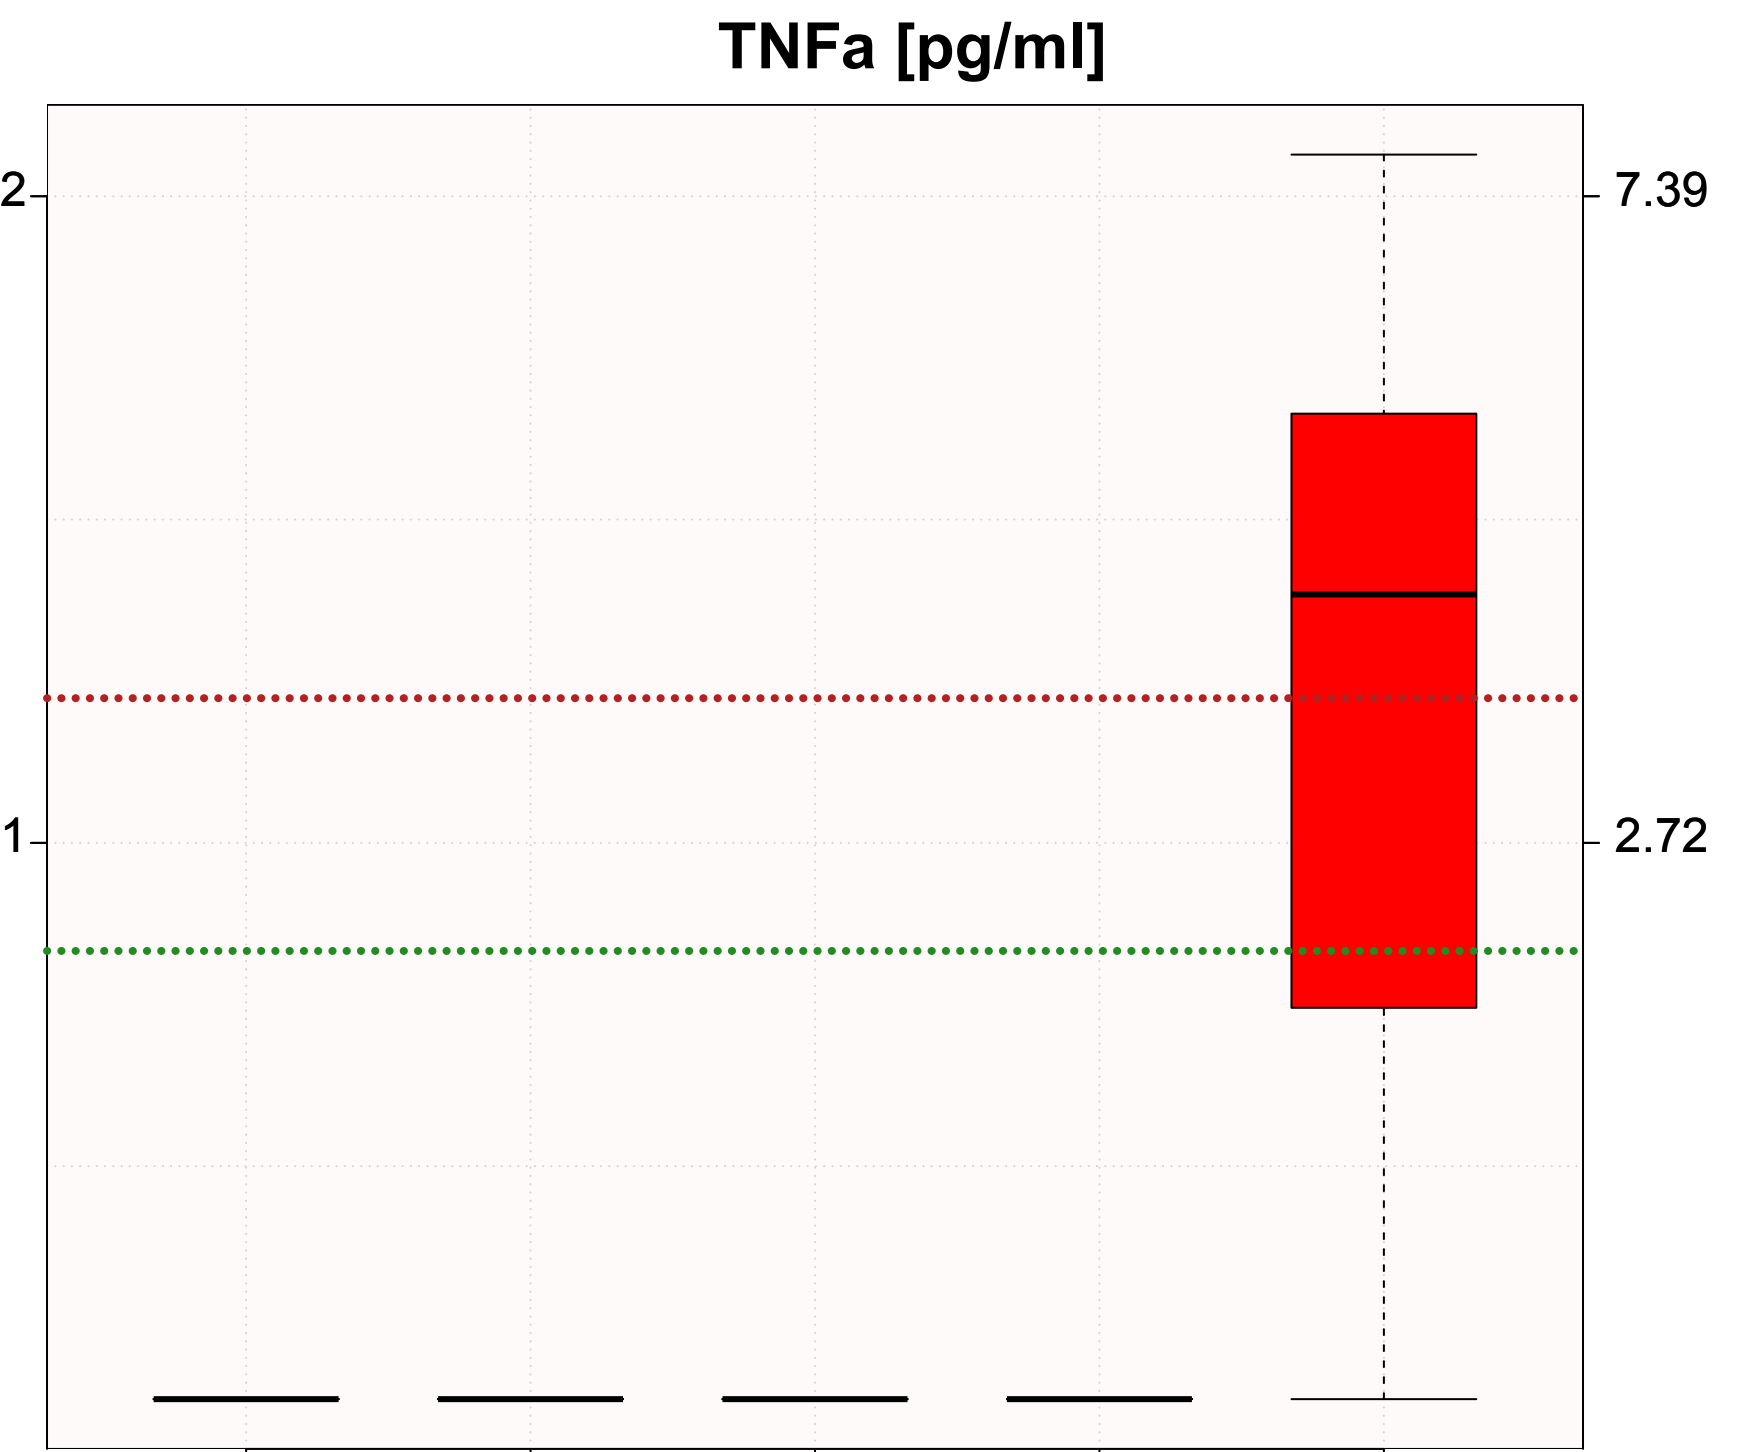

— LOD  
— LOQ

Sham  
Carrier  
Test-1  
Test-2  
3R4F

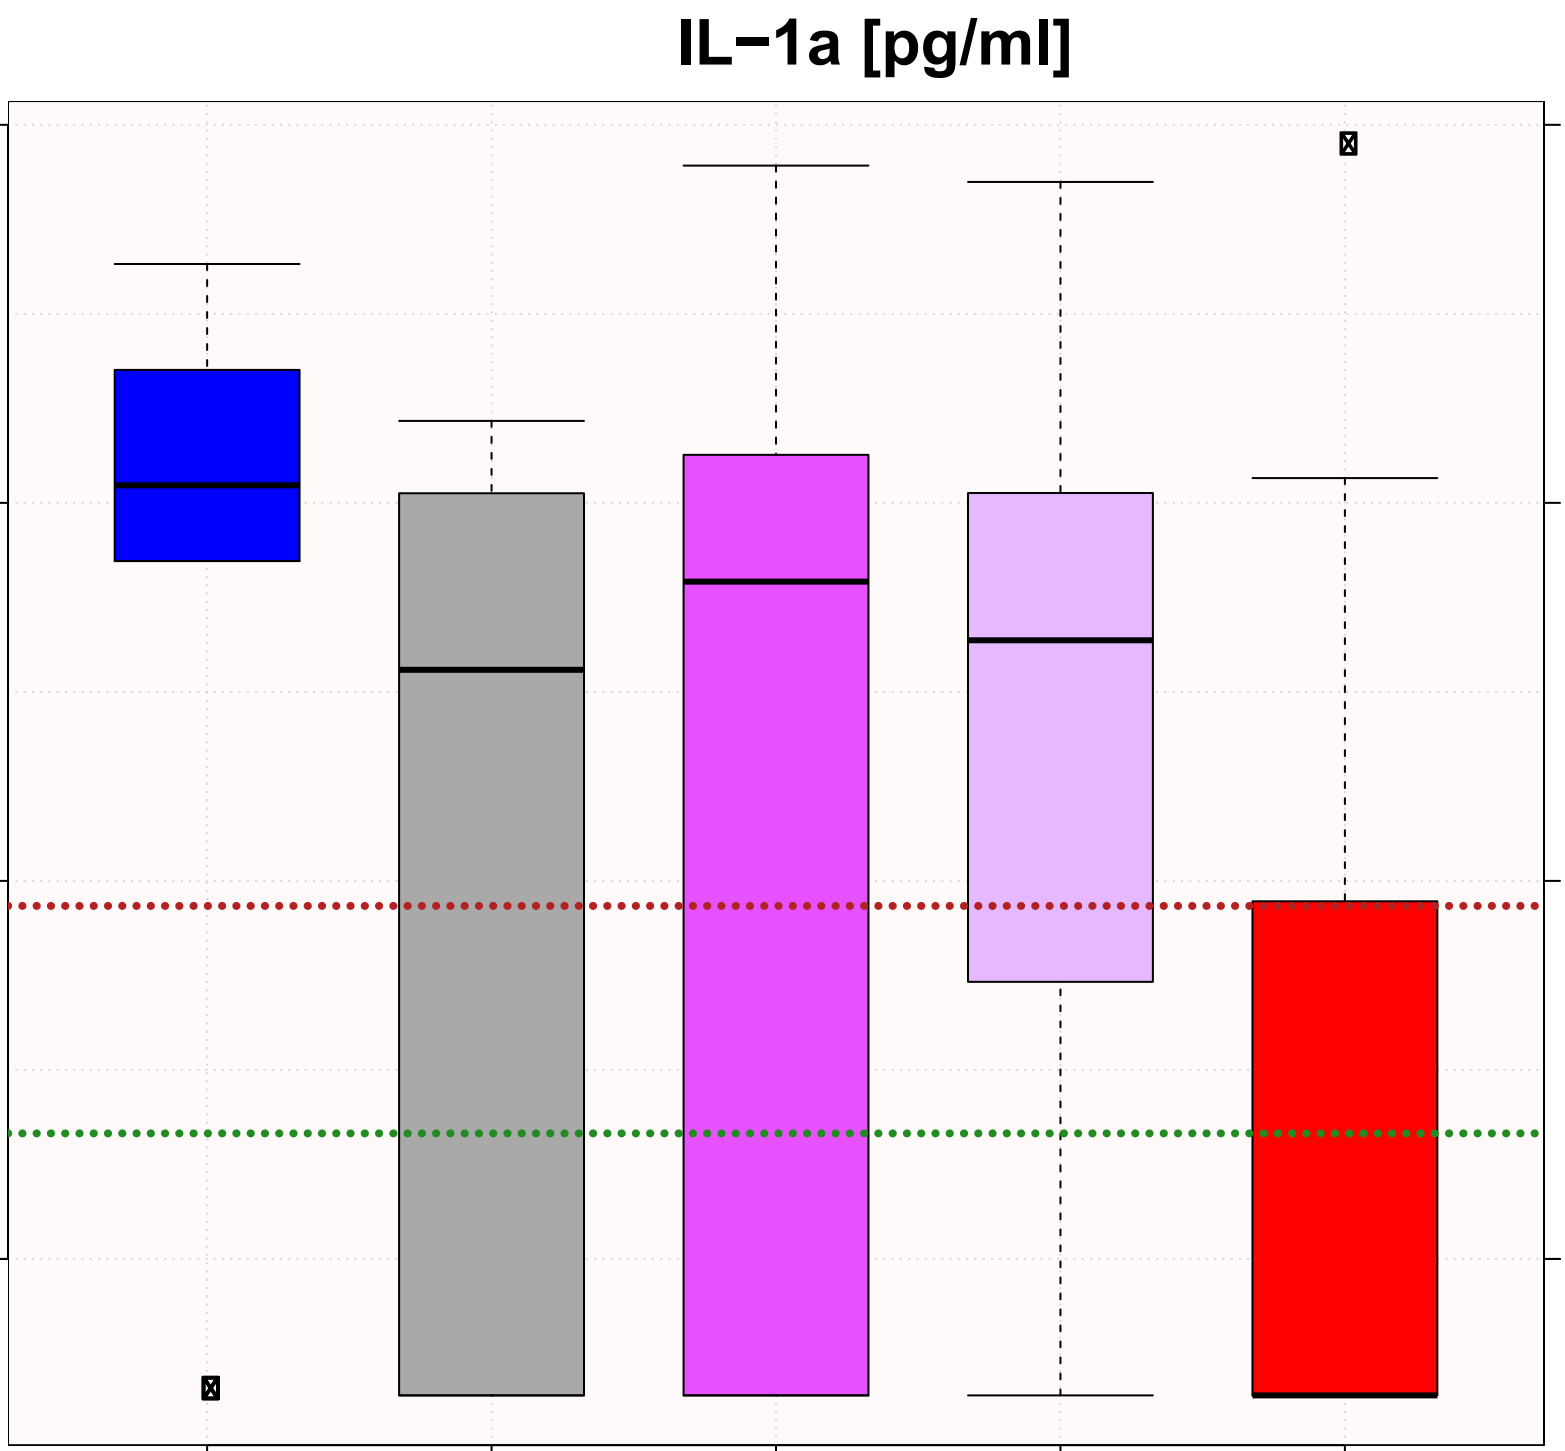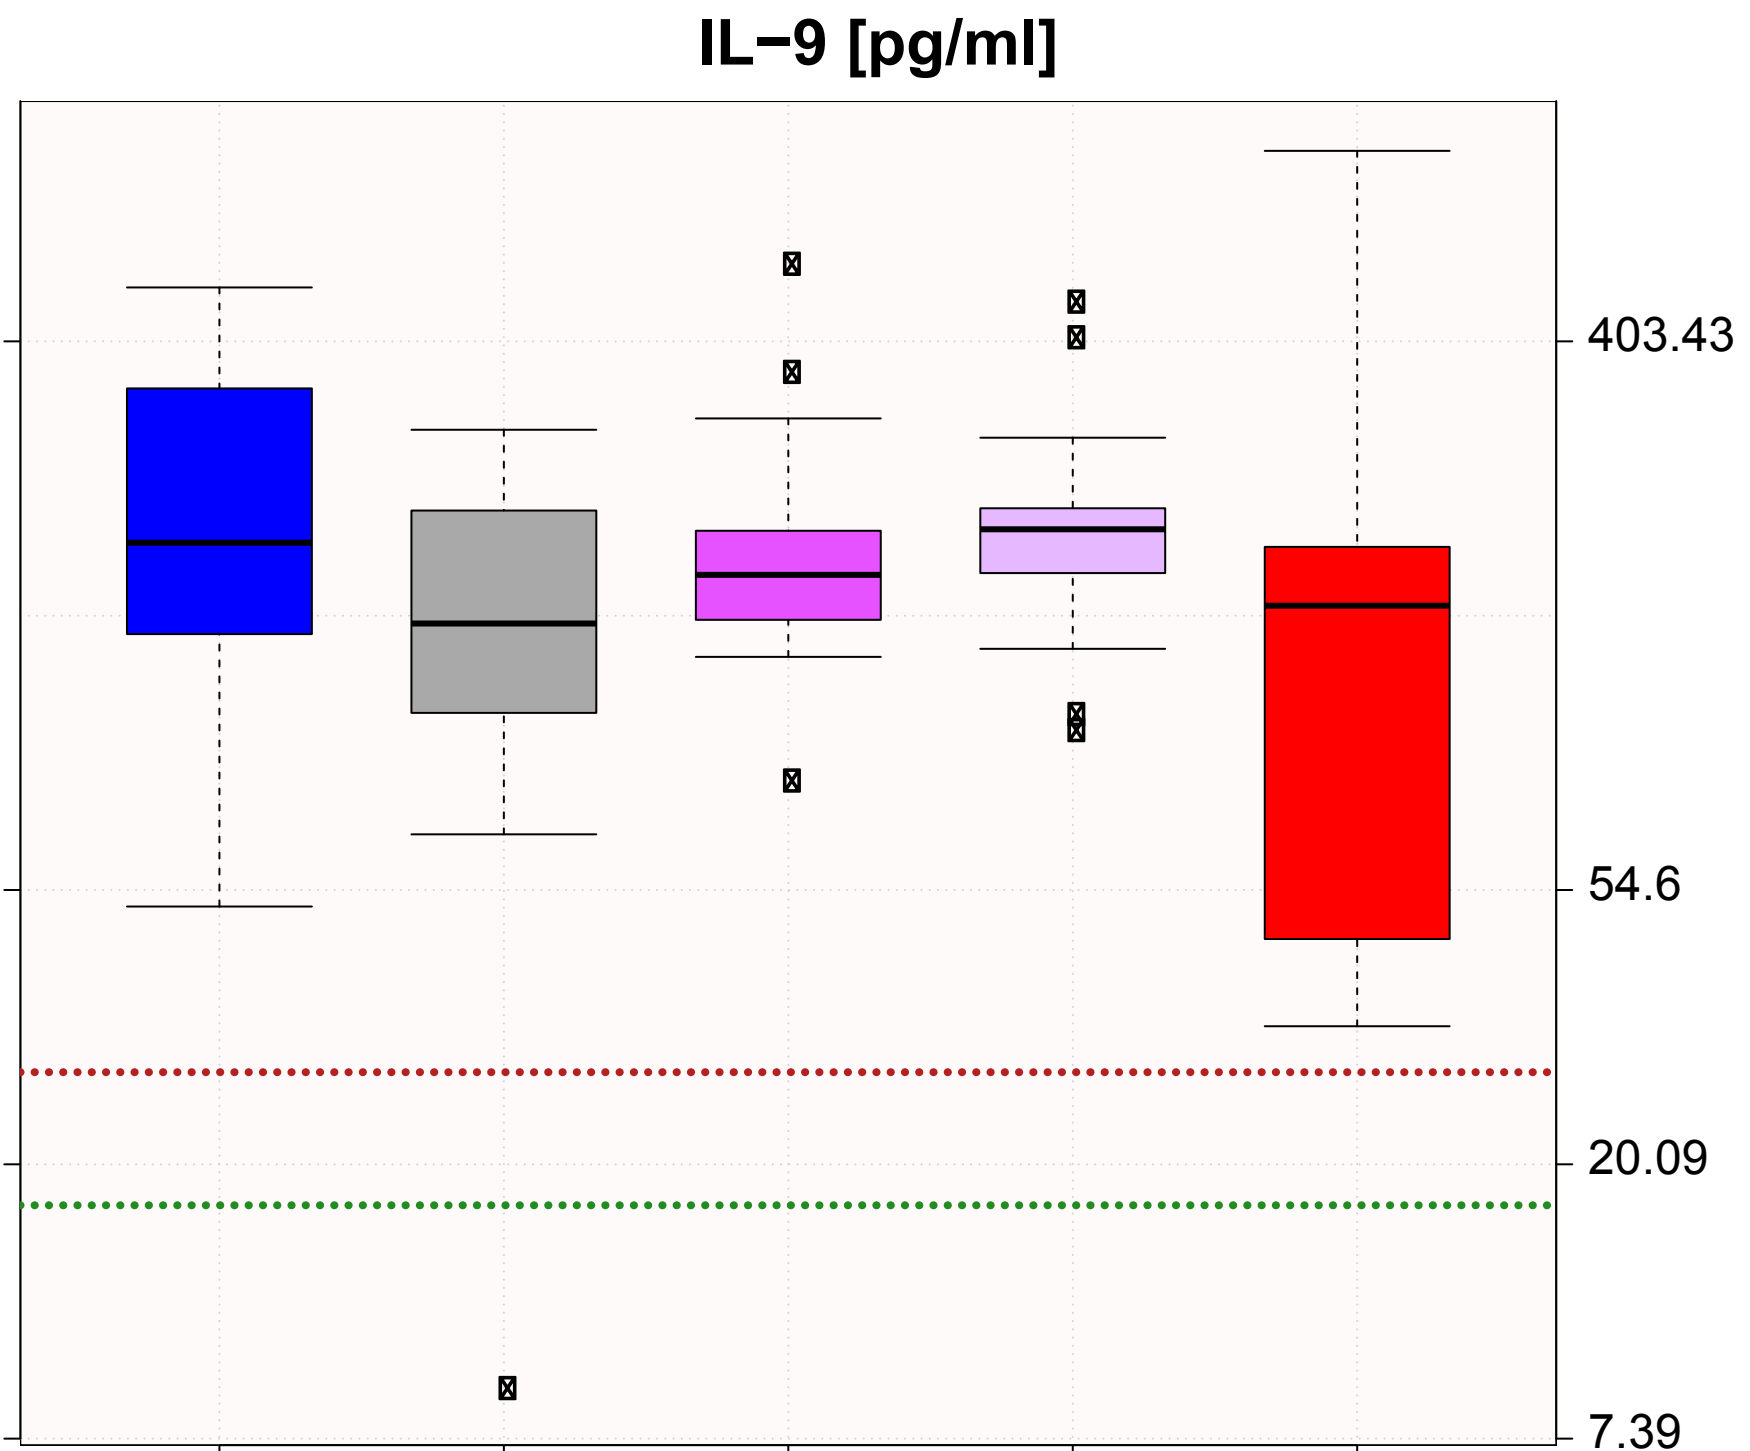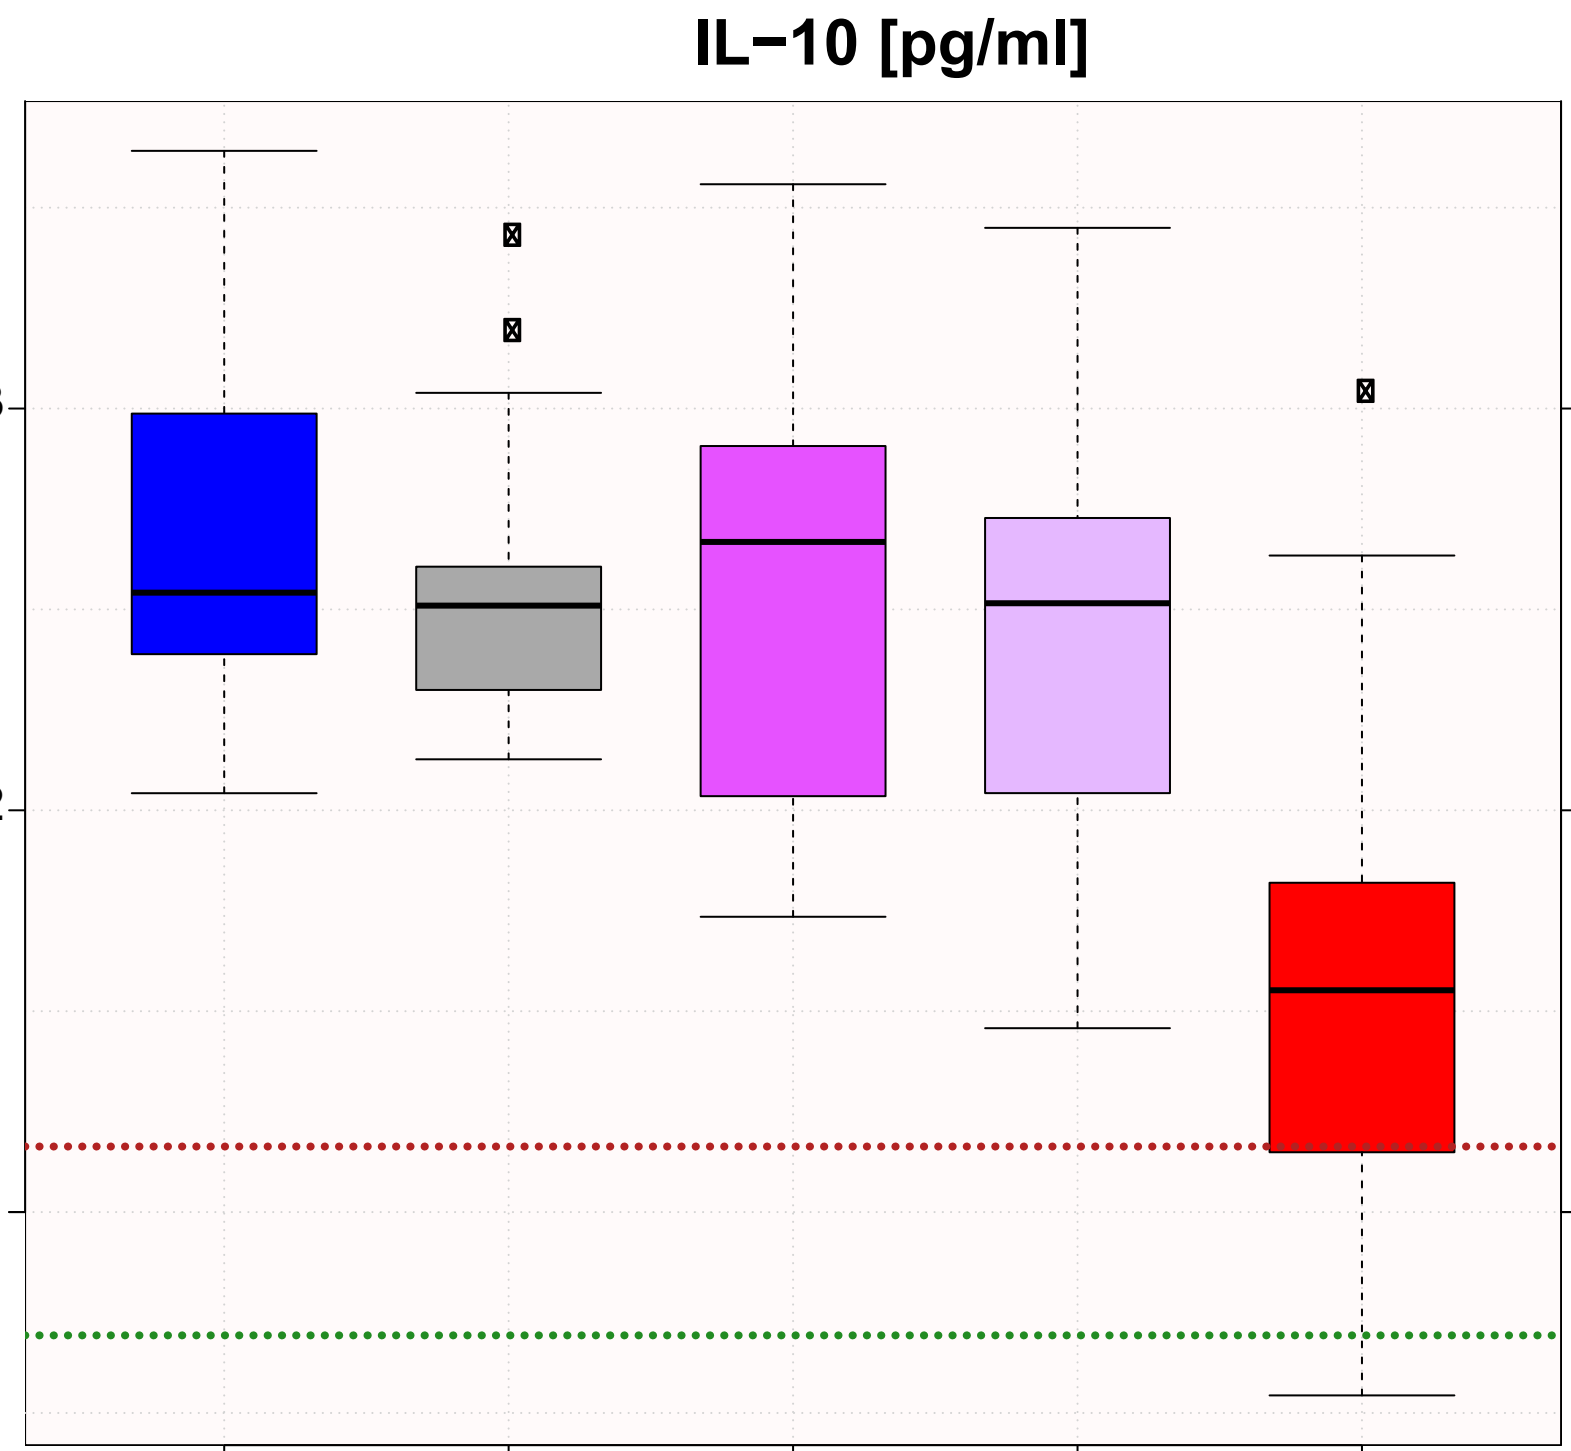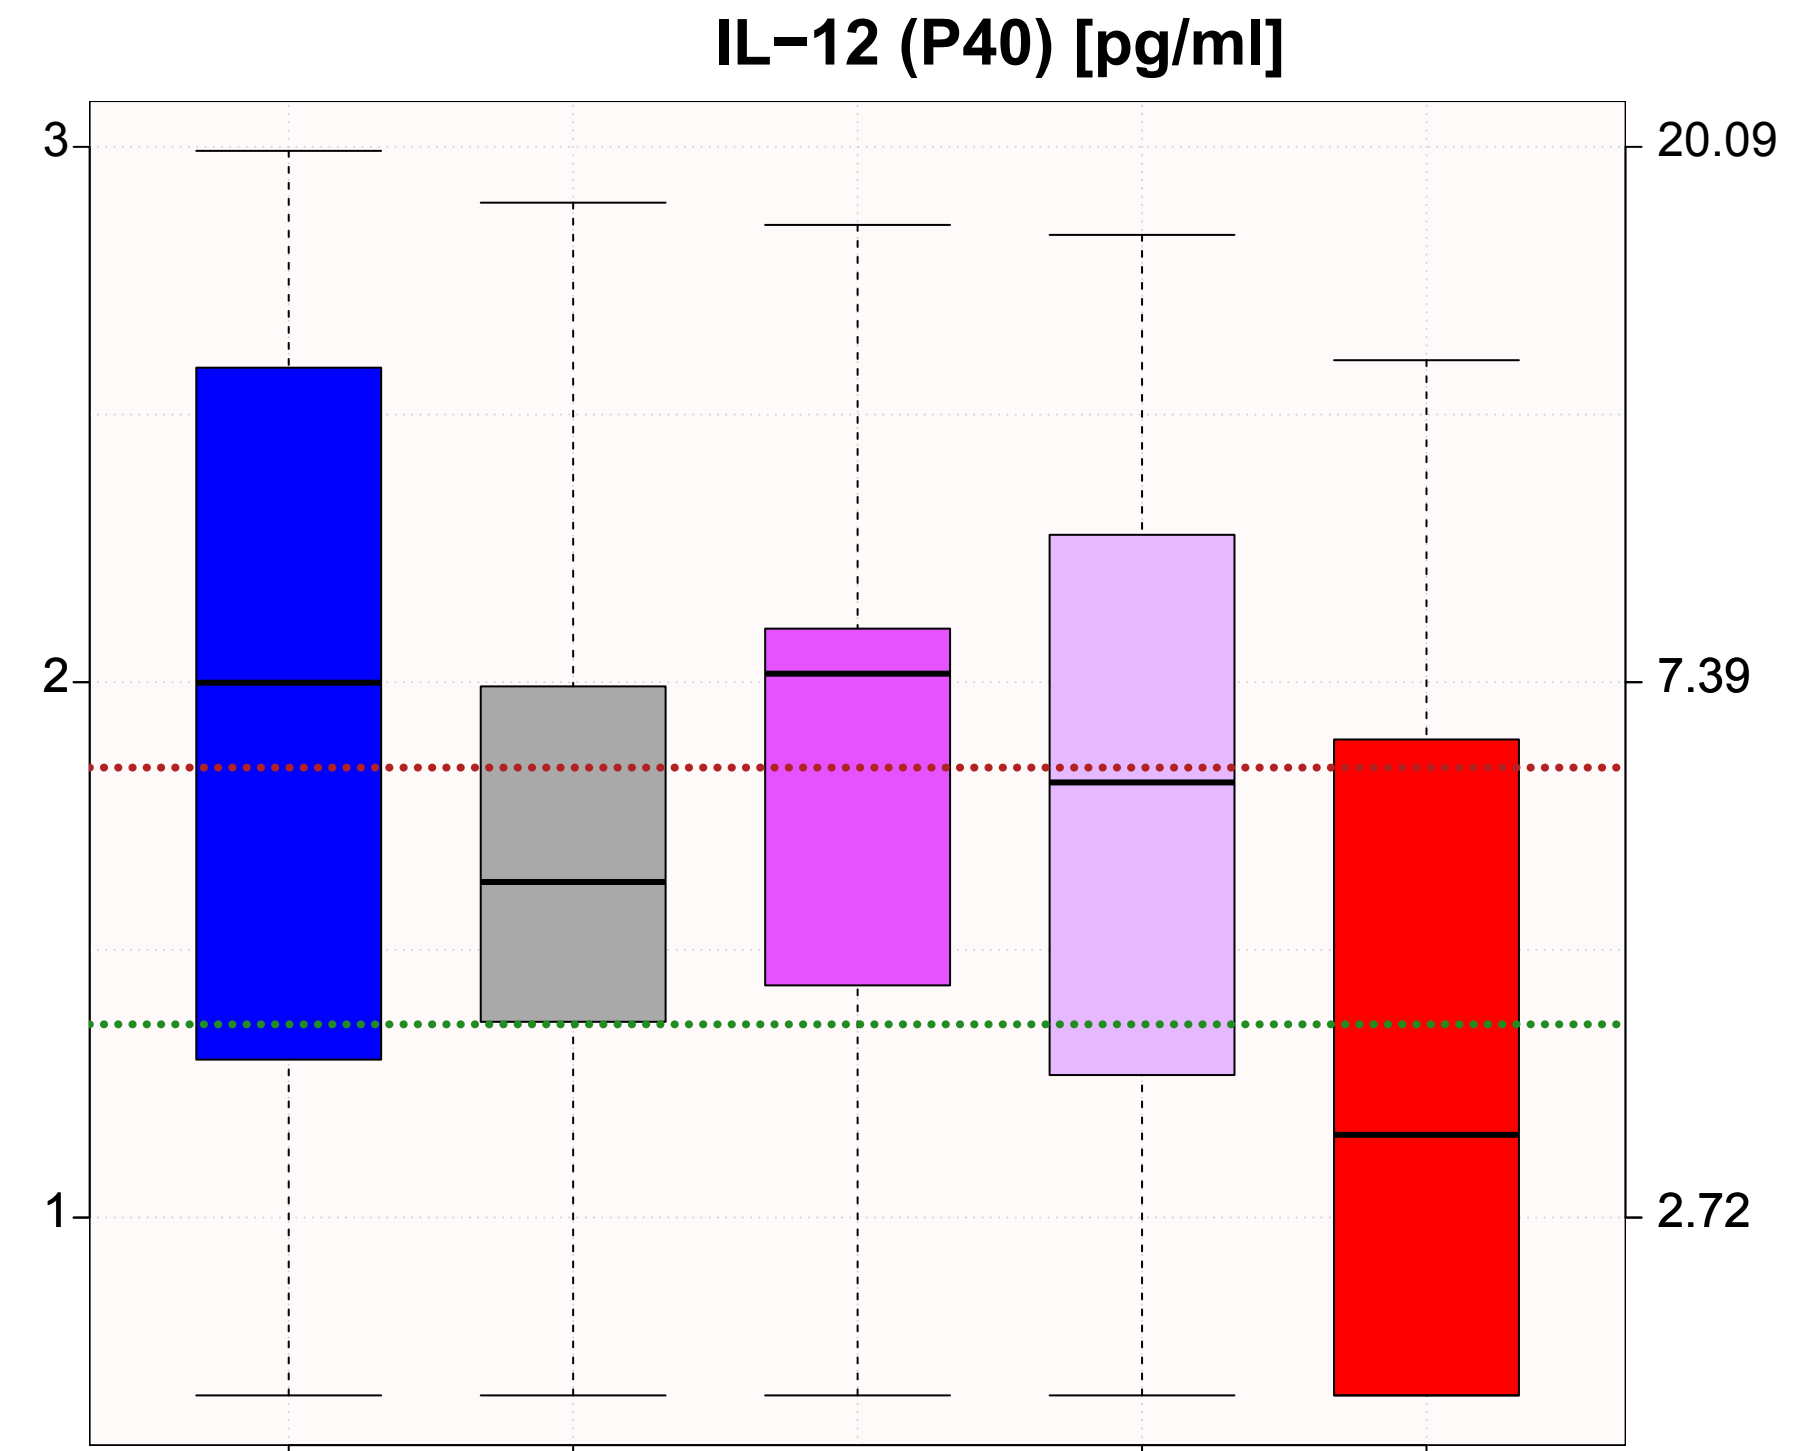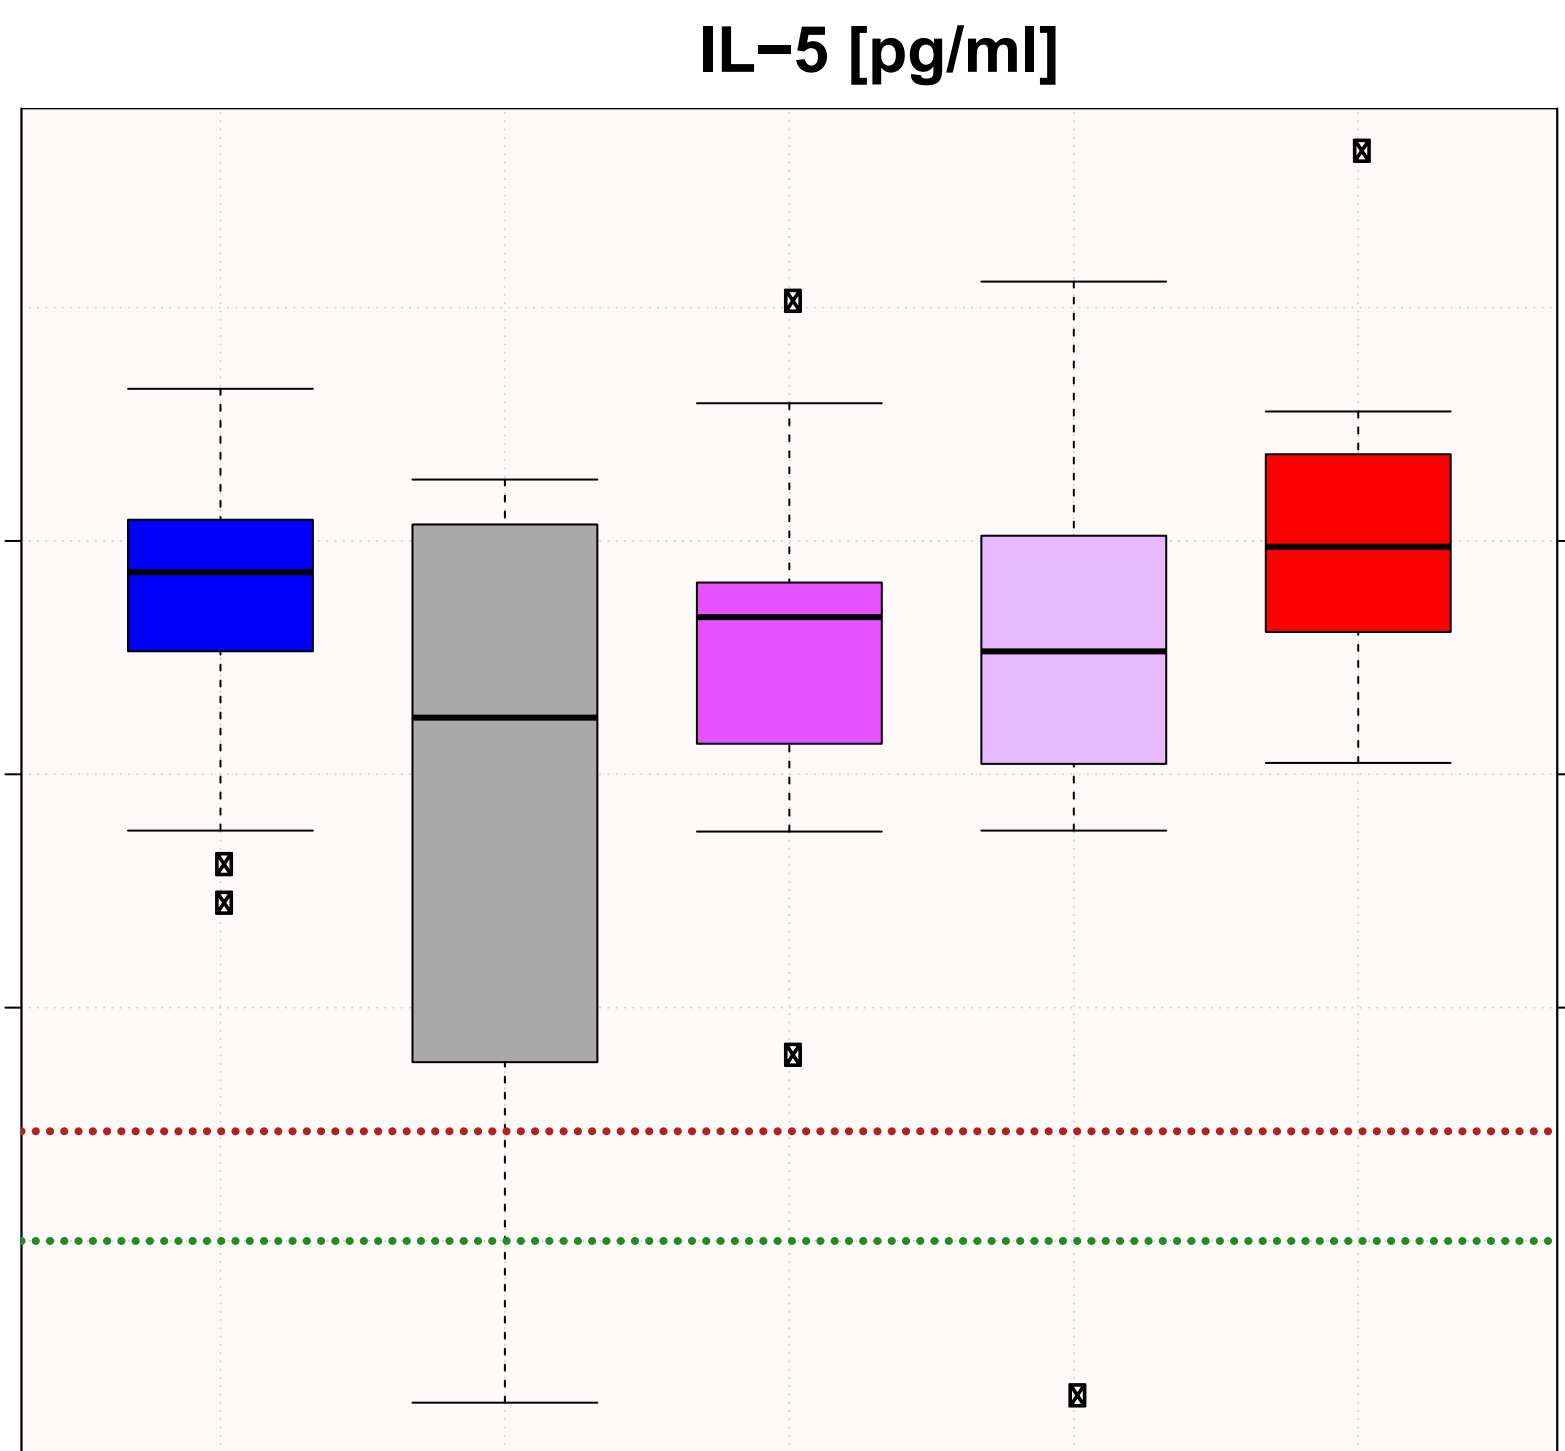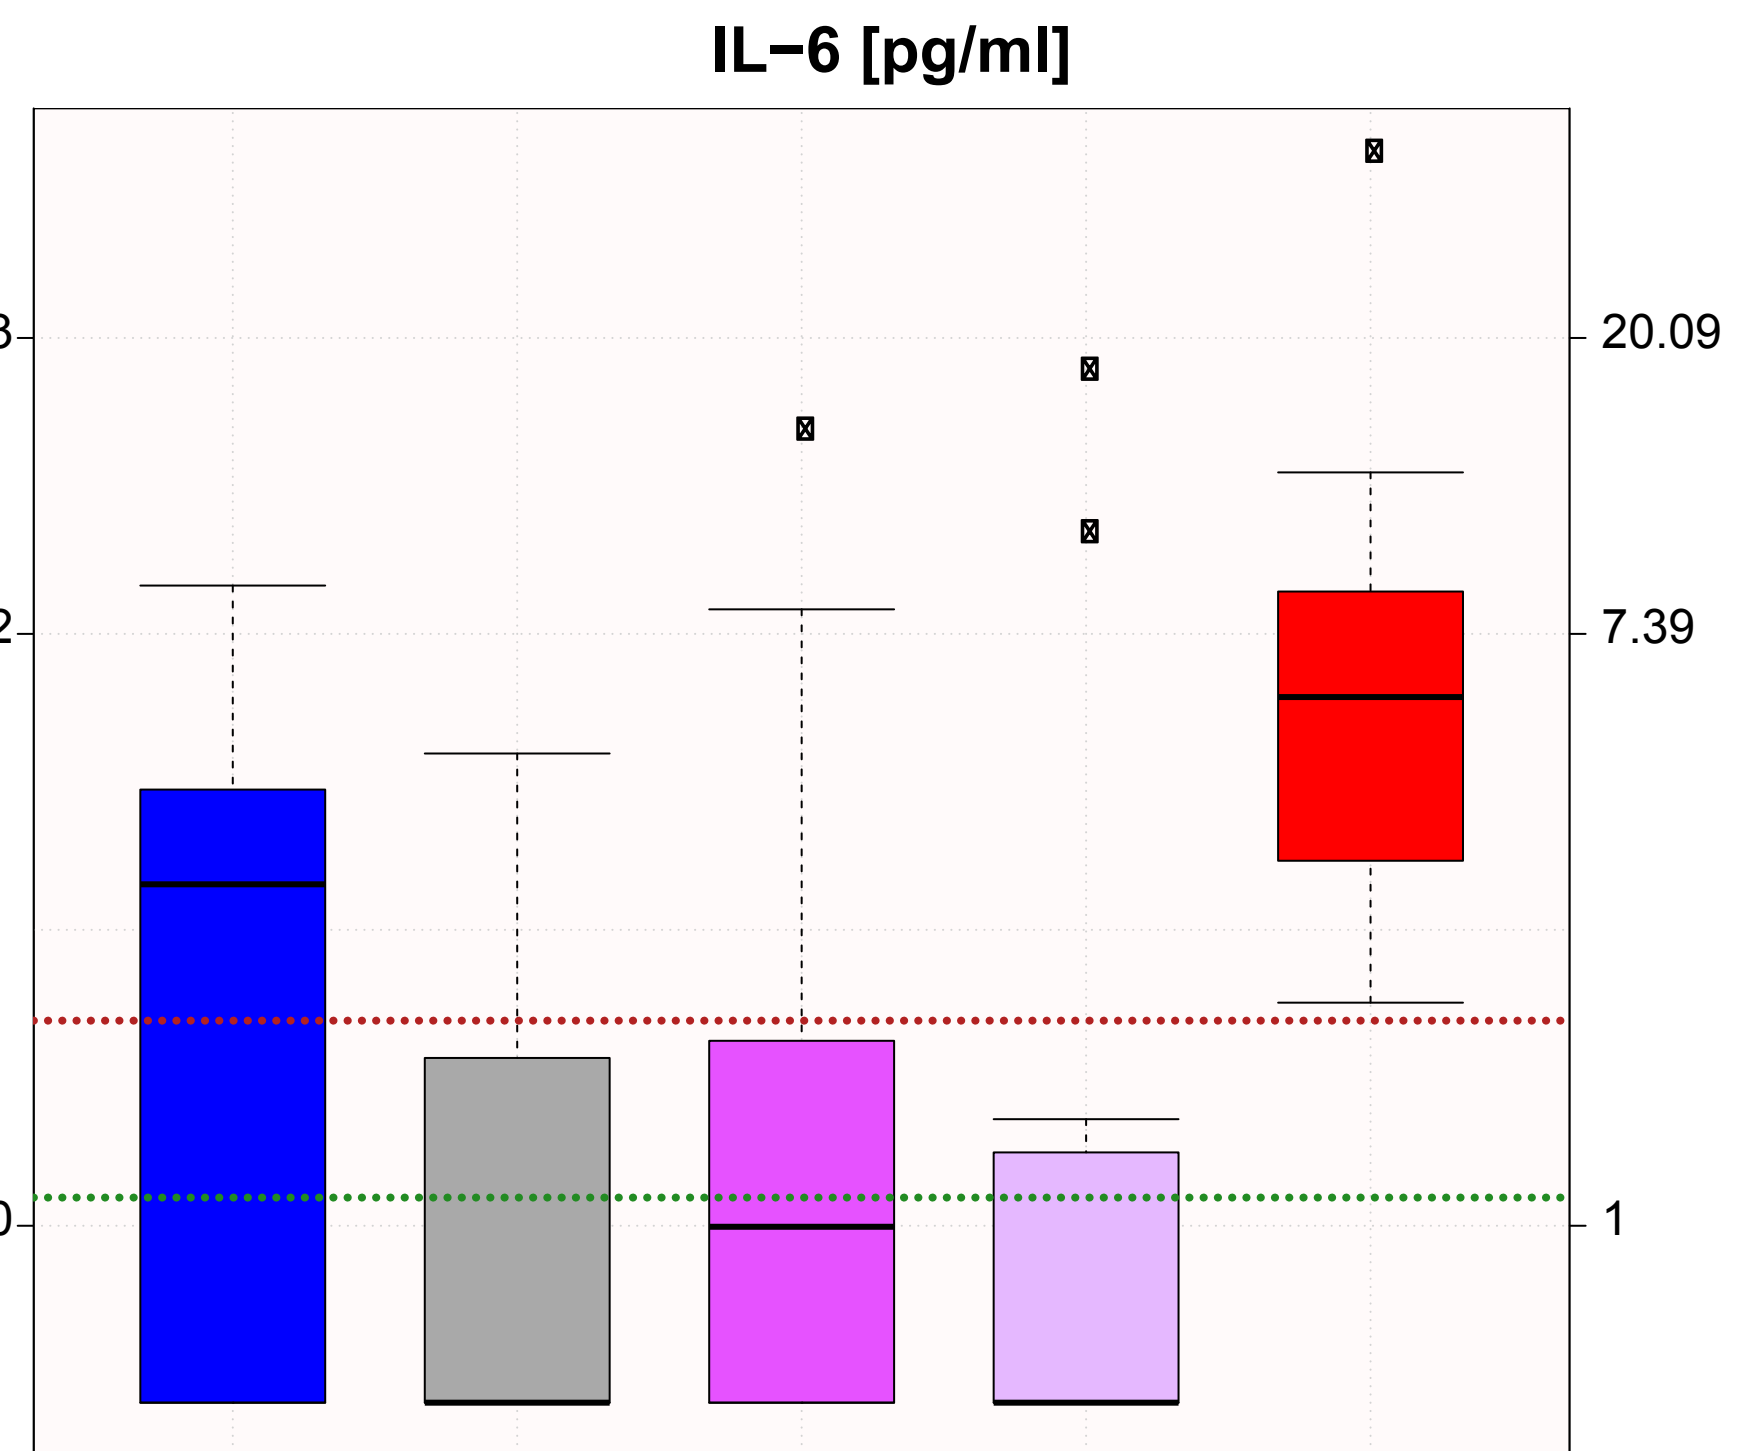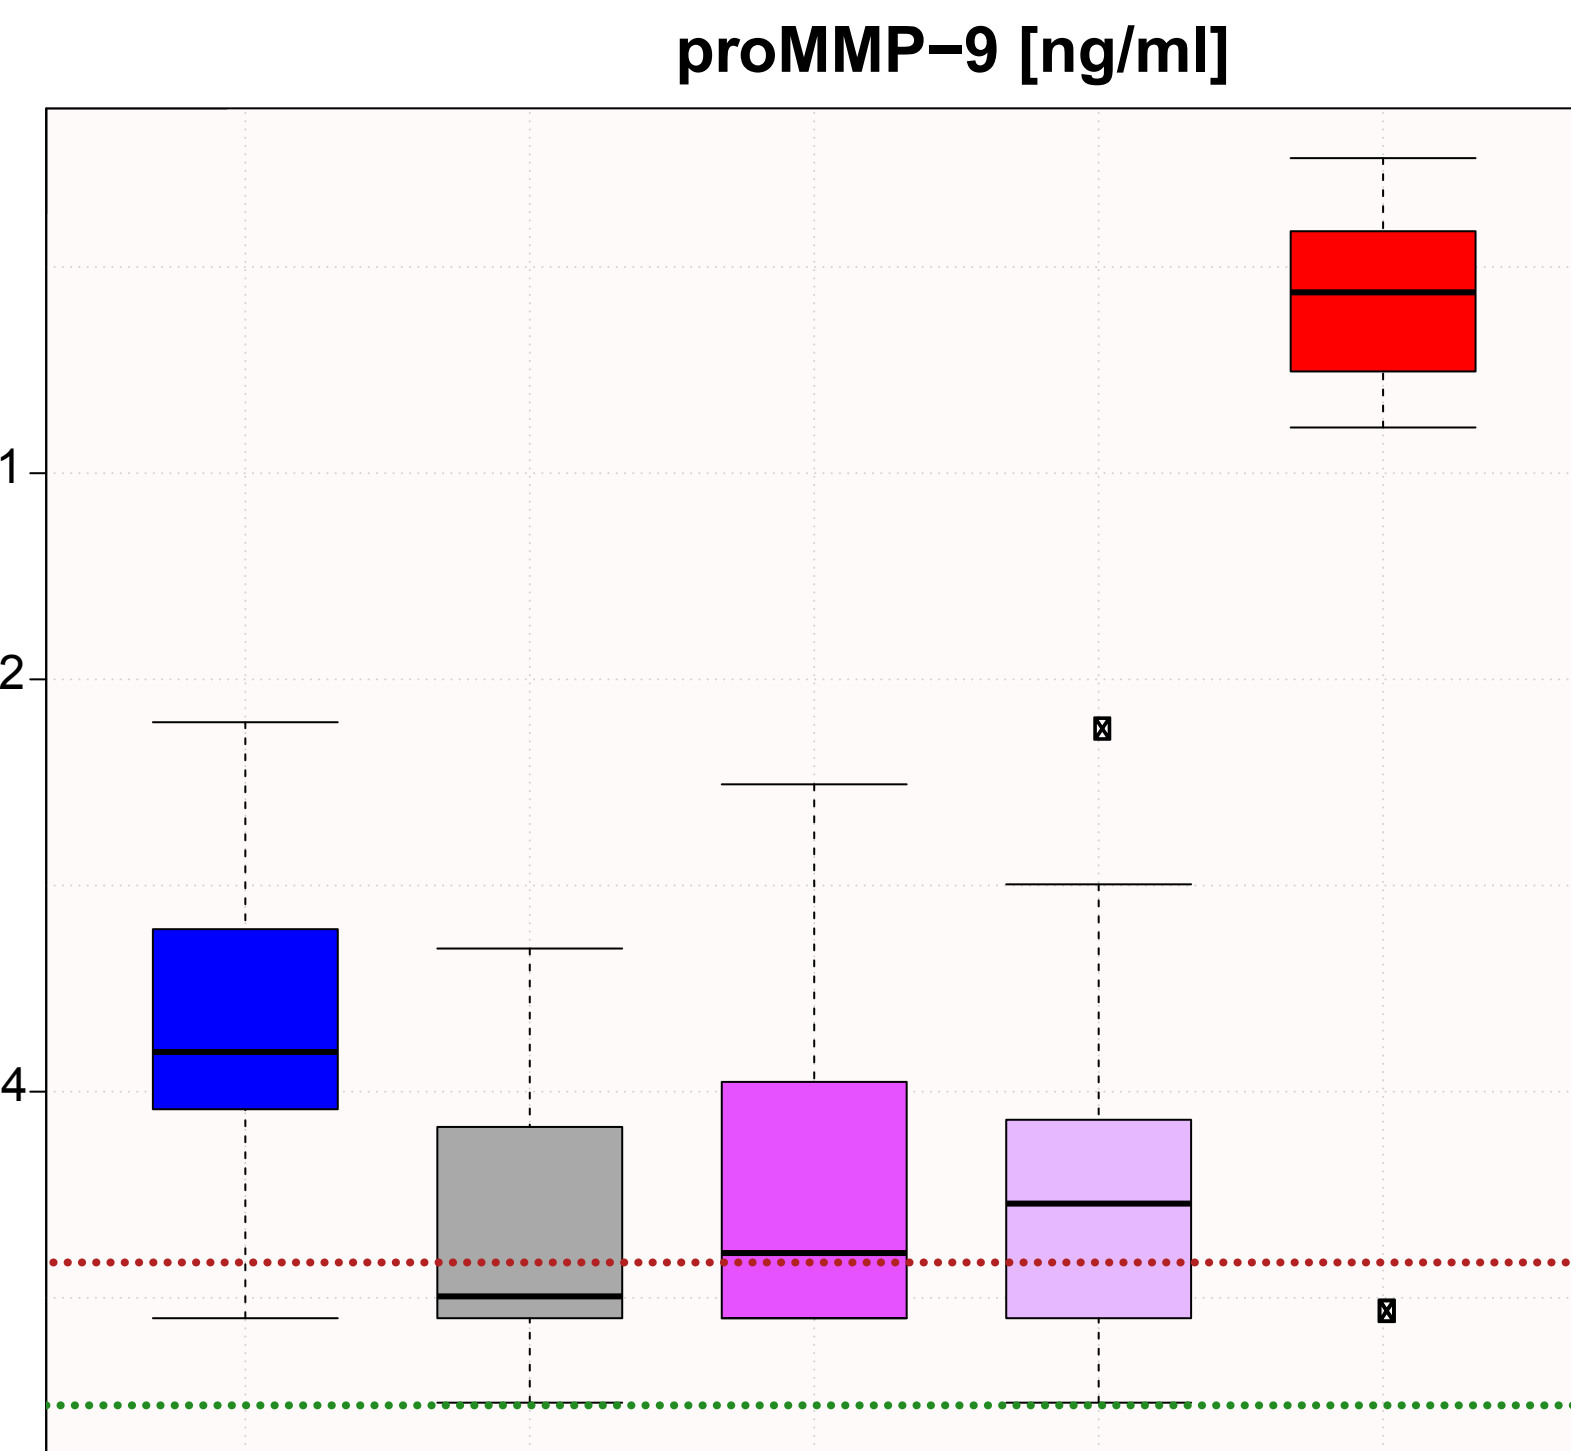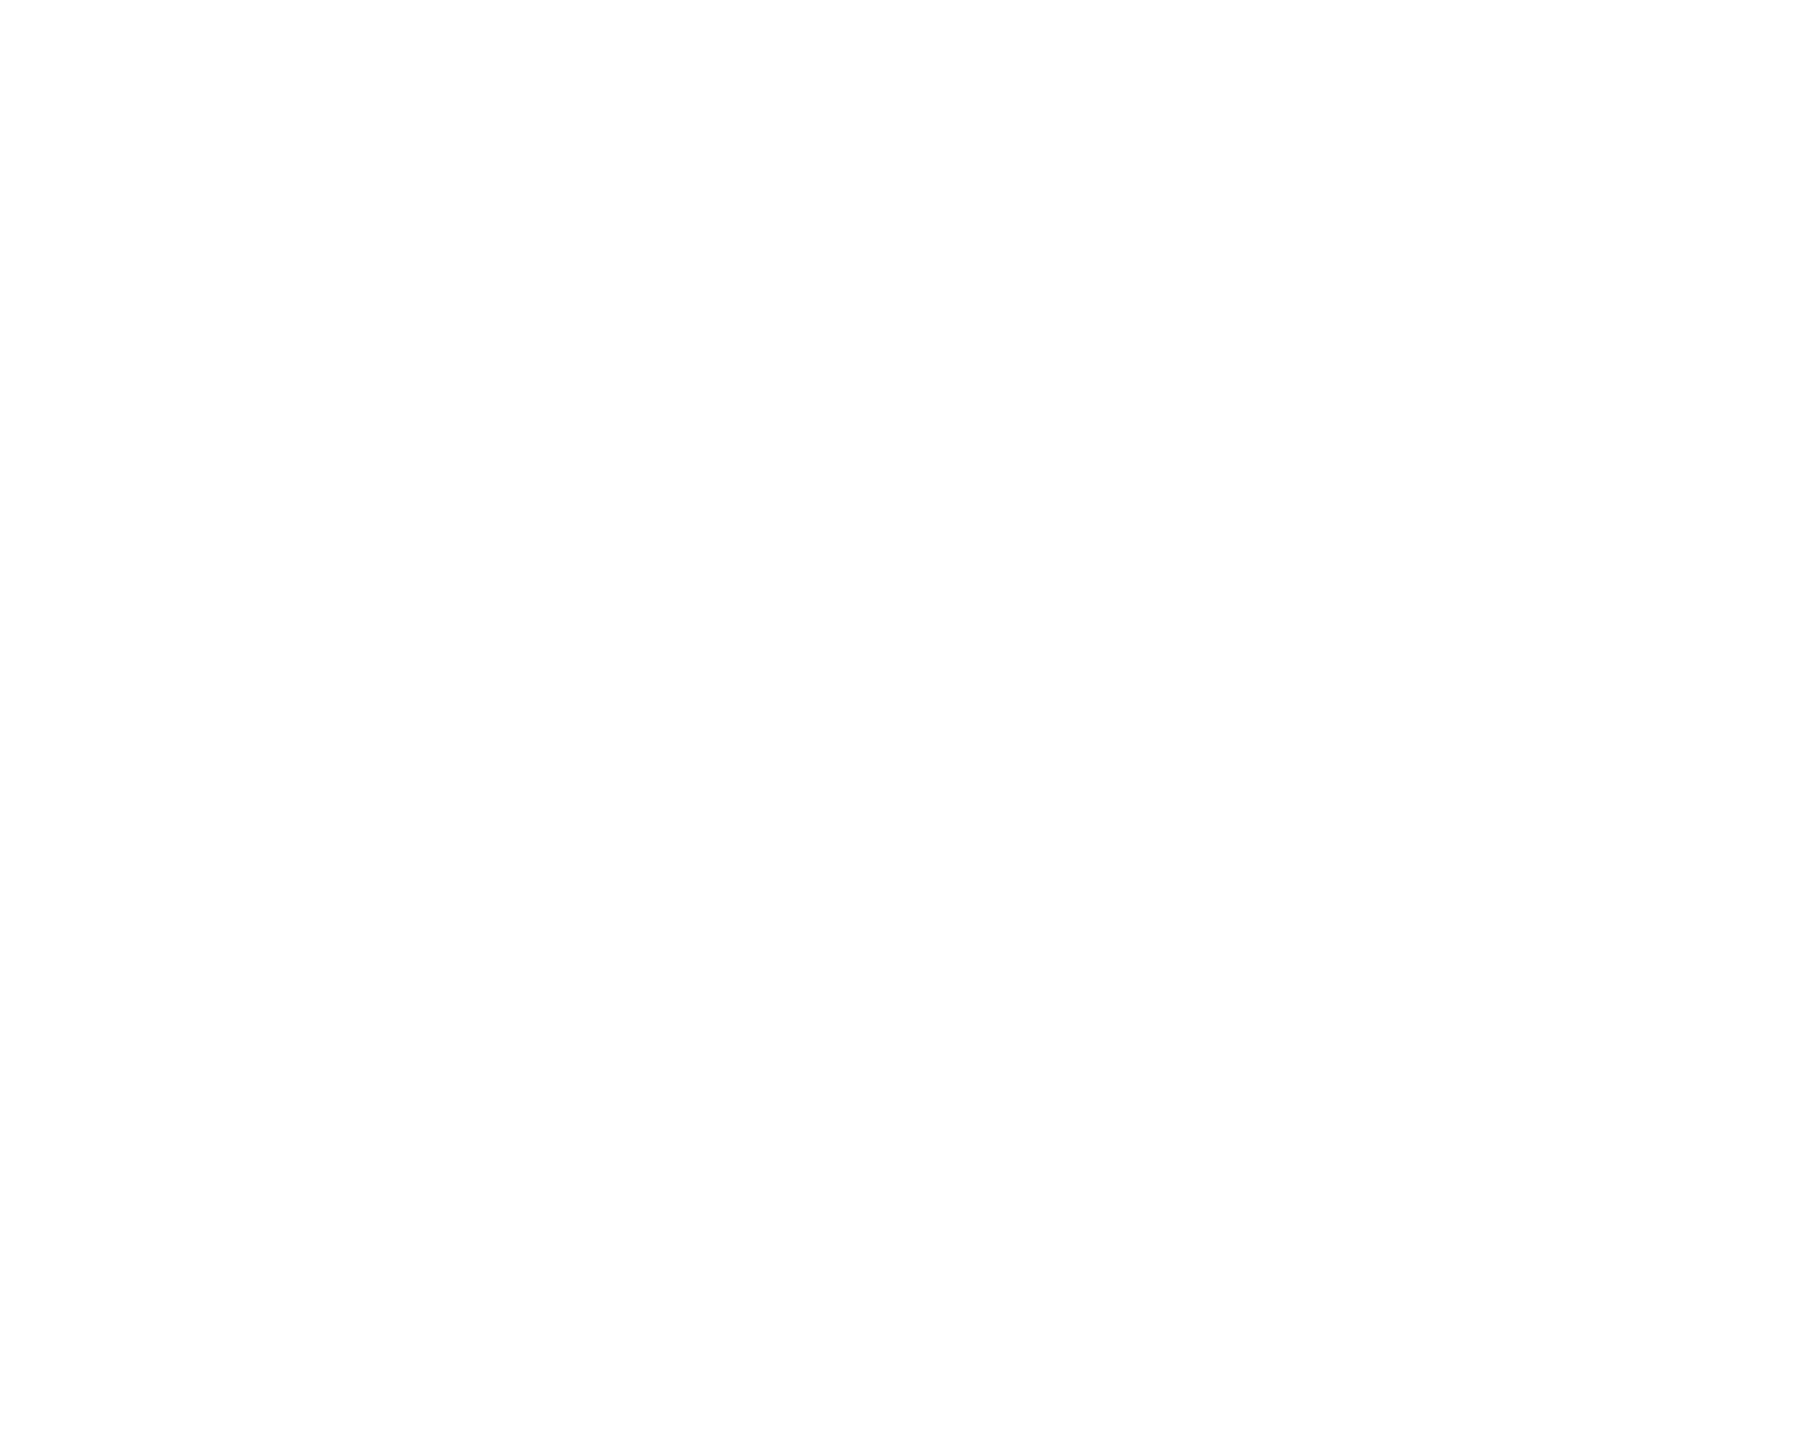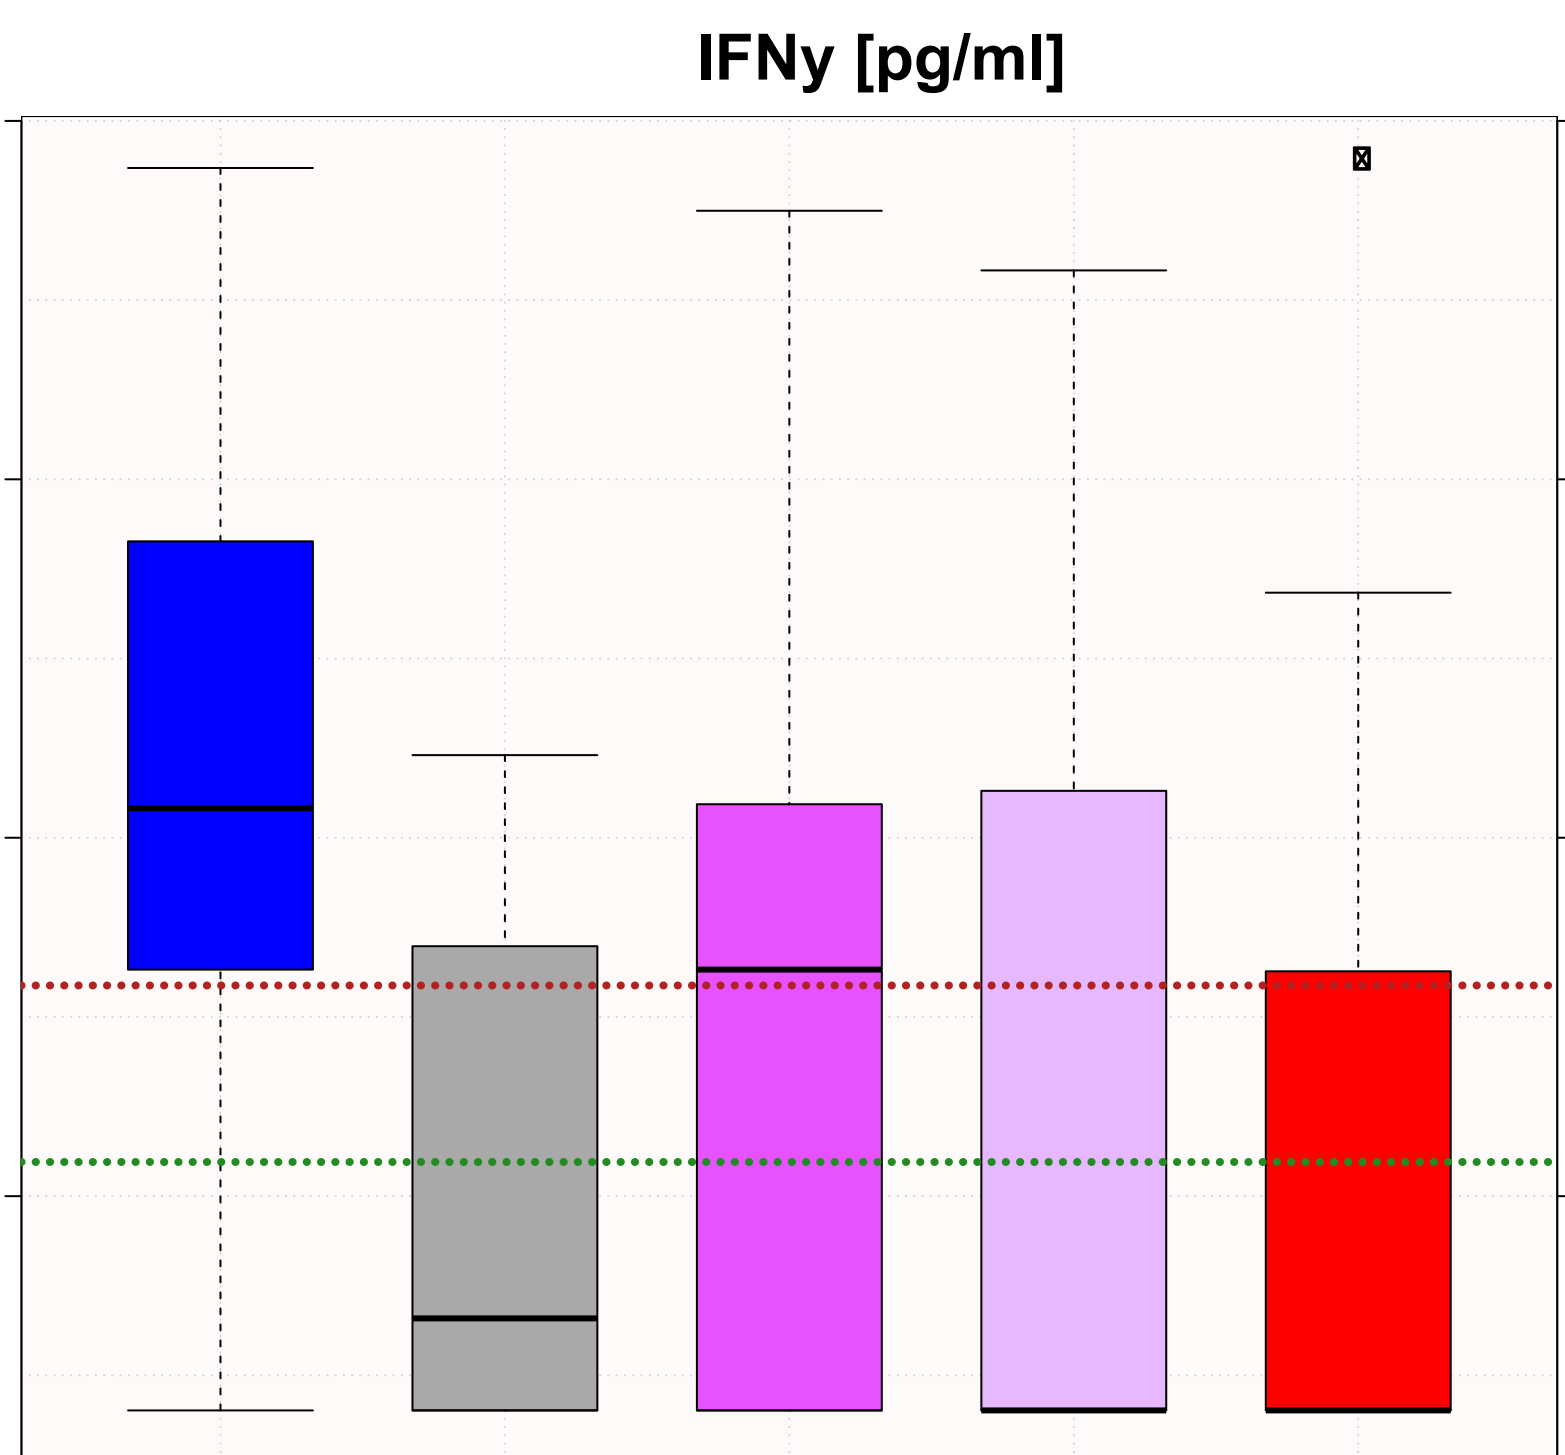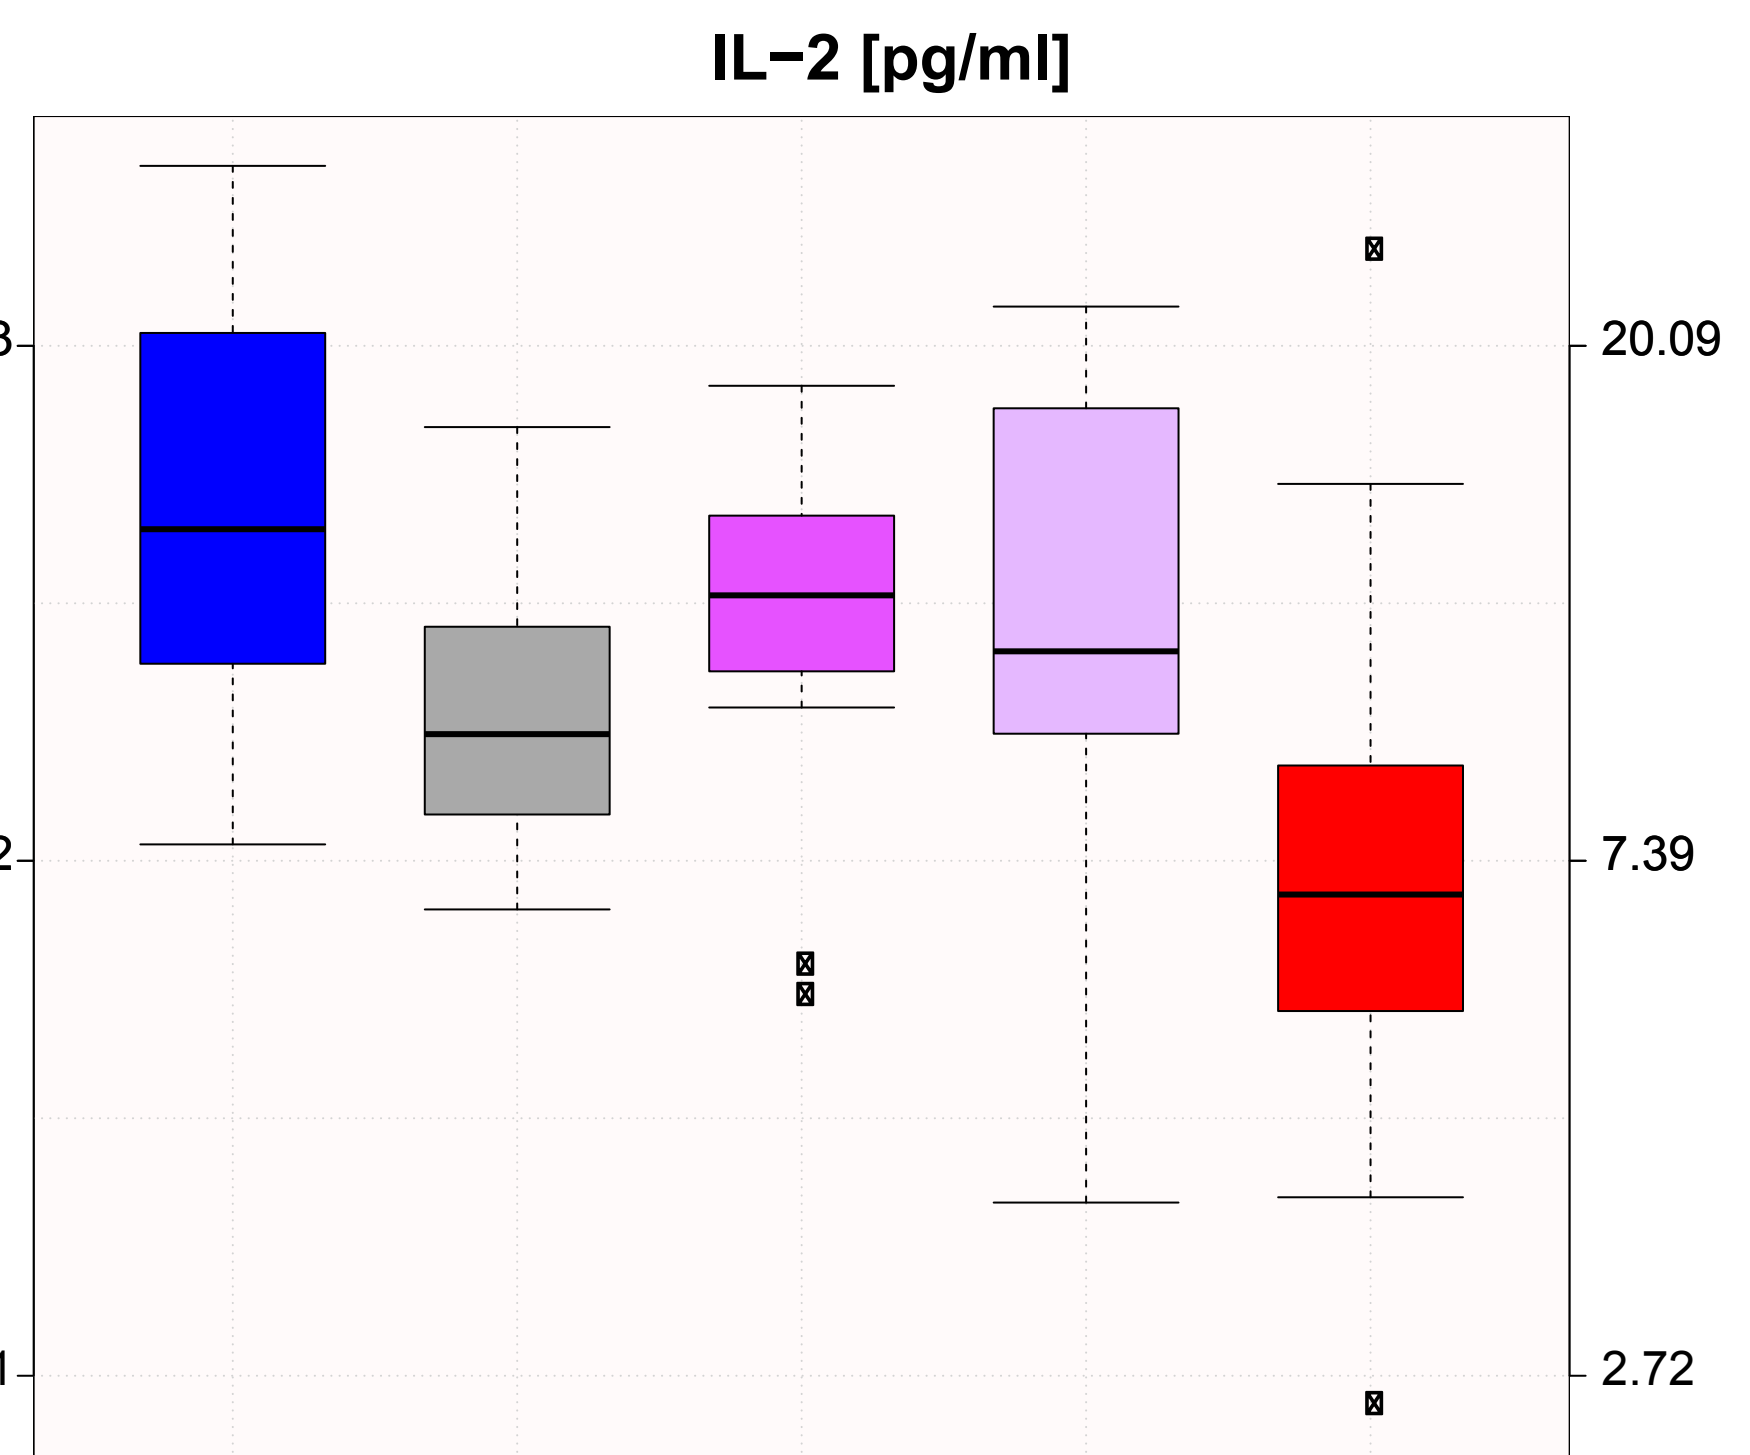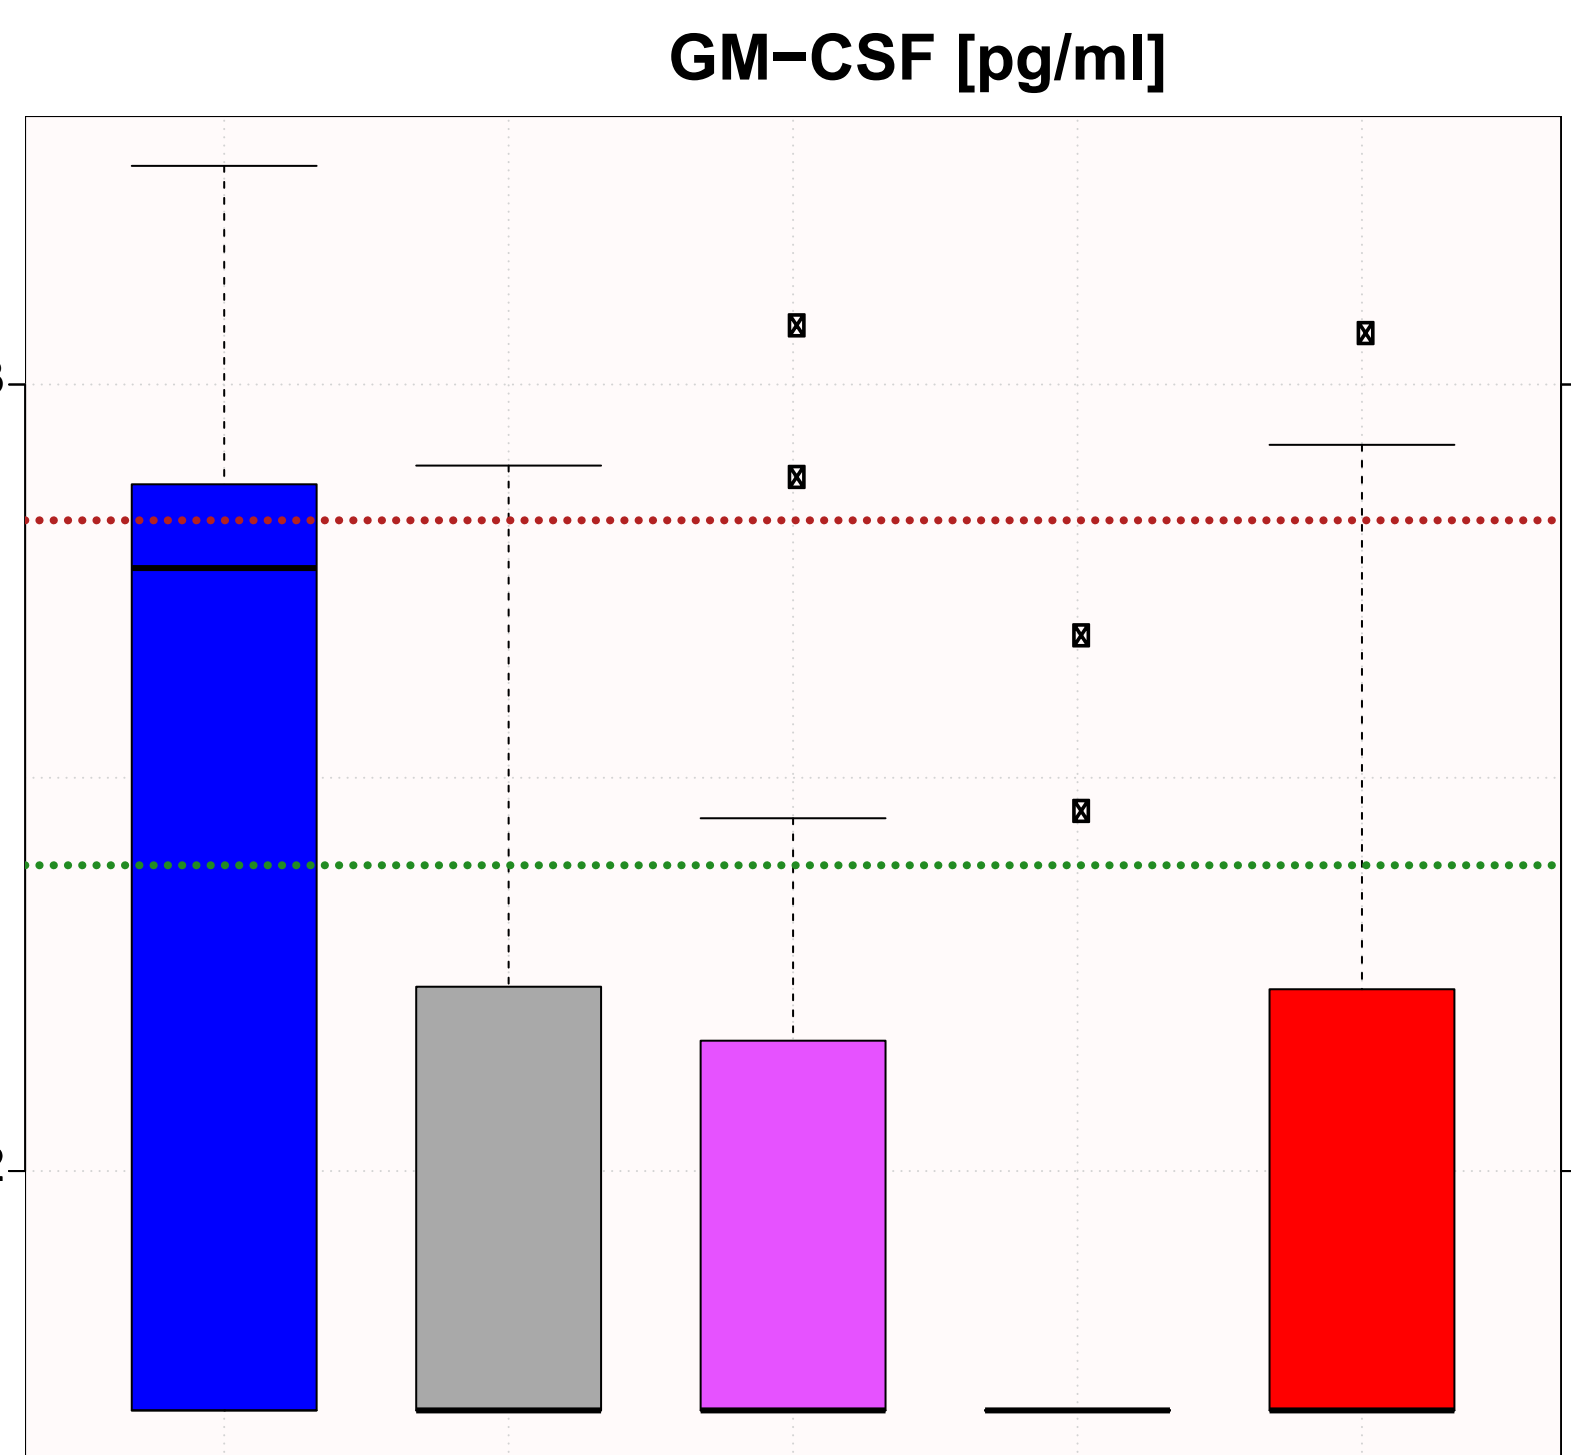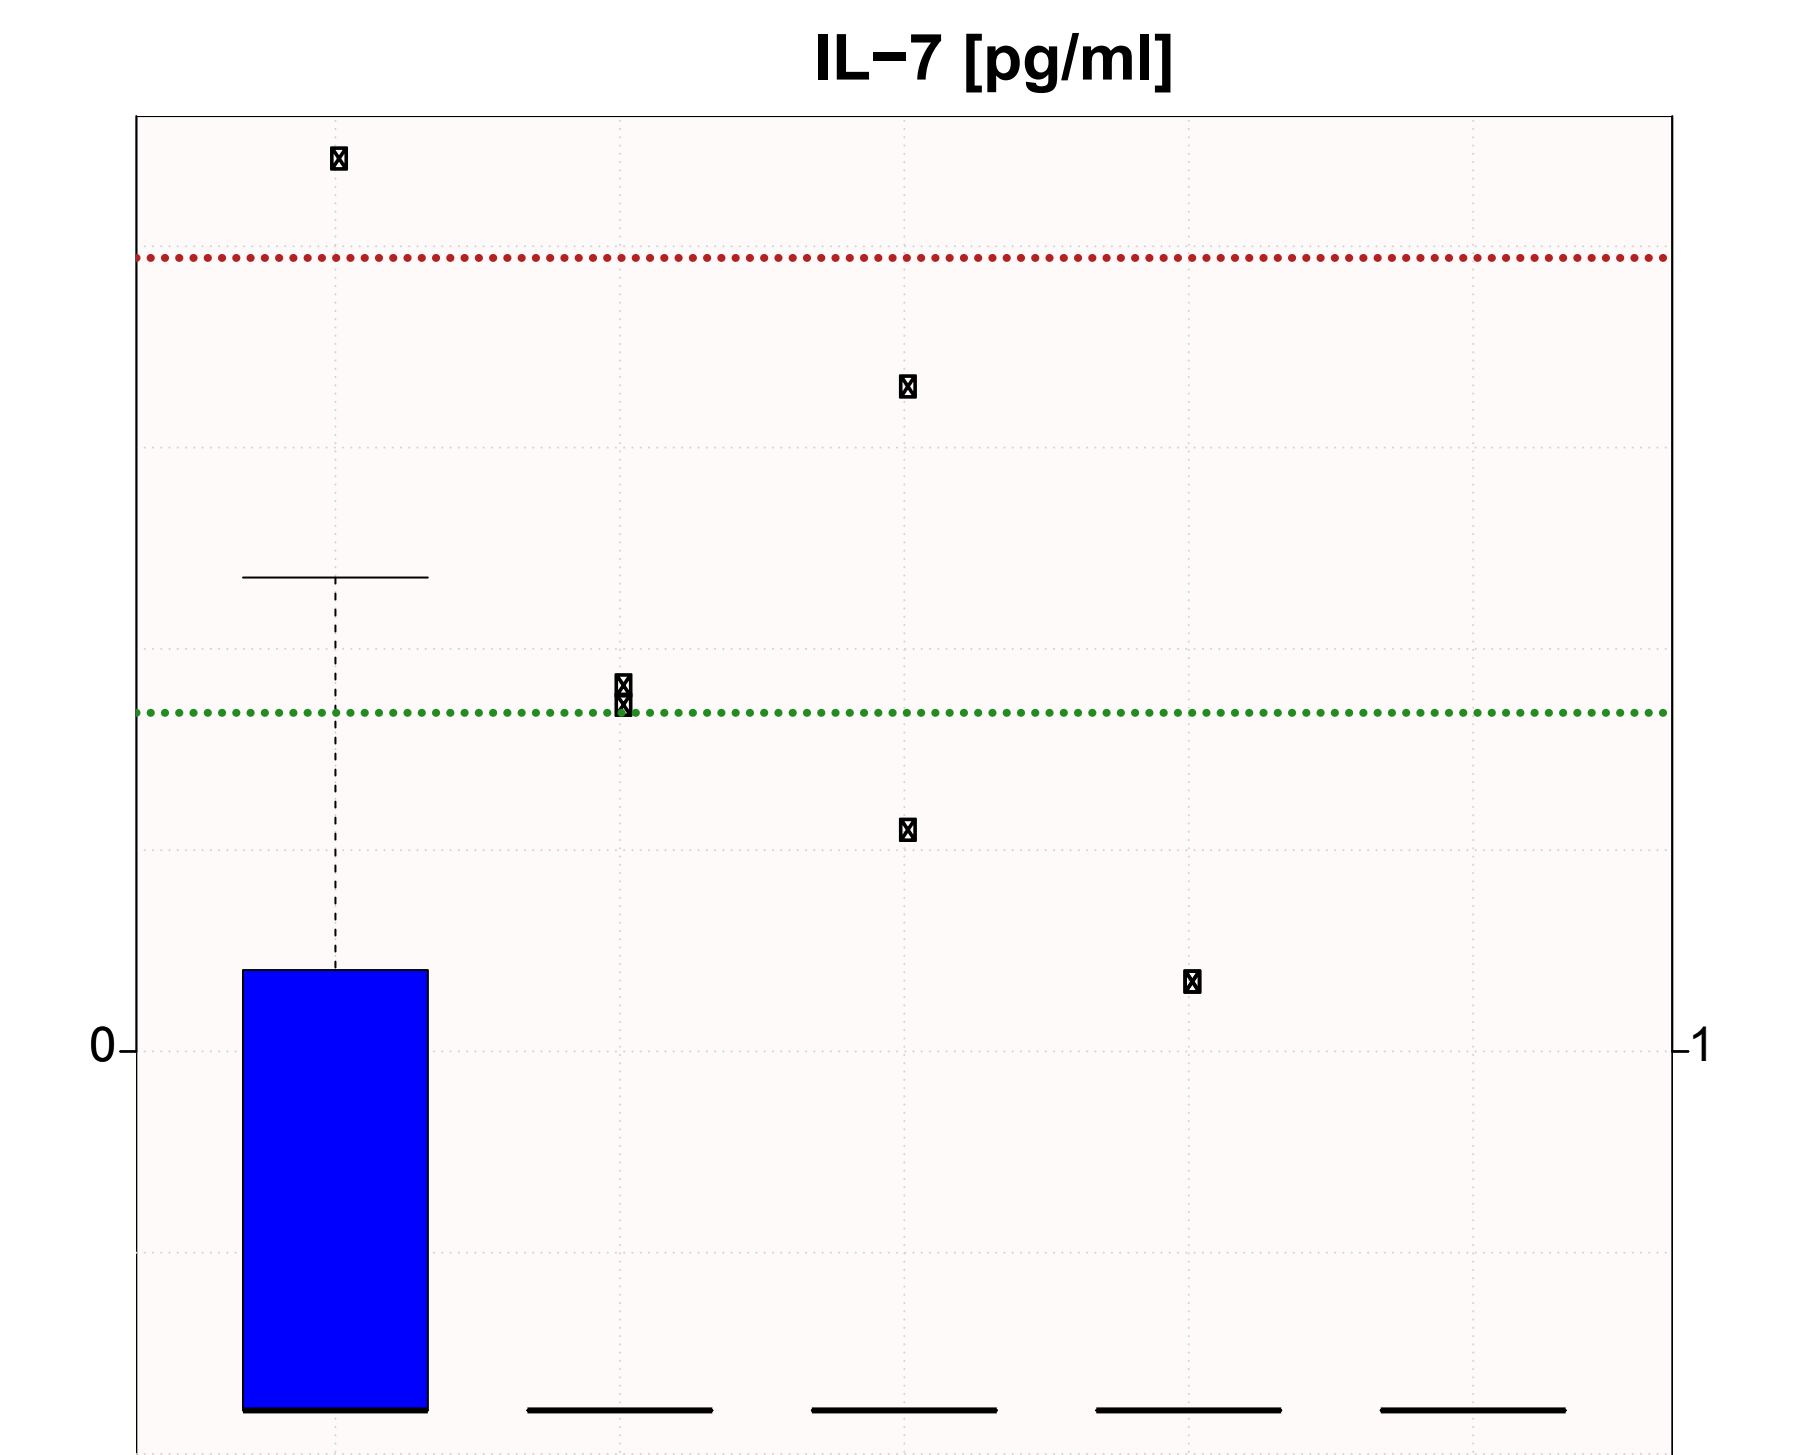

Supplement: Supplementary file 2 [file 1]
